# Supplementary material for: A Critical Role for Fas-Mediated Off-Target Tumor Killing in T-cell Immunotherapy
Source: Oxford University Press journal article supplement (doi:10.1158/2159-8290.cd-20-0756), 2021-01-14
Supplement: 21598290cd200756-sup-244200_2_supp_6718608_qj4yrp.xlsx [file 21598290cd200756-sup-244200_2_supp_6718608_qj4yrp.xlsx]

## Sheet: Median % Reads
Target		Iteration 0		Iteration 1				Iteration 2				Summary
Gene.guide	sgRNA	0G	0R	1GC	1RC	1GJ	1RJ	2GC	2RC	2GJ	2RJ	G/R Ratio (Ctrl)	G/R Ratio (Jedi)	Jedi/Ctrl
Tap1.4	GTCTCTAGCAAAGTCCACGC	0.138441	0.193729	0.0923845	0.178232	2.62509	0.218494	0.162519	0.250224	13.9031	0.139749	0.714611	99.486	139.217
Rps6ka5.1	CCACATGGCCGTTAGAATCC	0.0368518	0.0365074	0.0455323	0.0286738	0.019327	0.0200161	0.0168878	0.001	0.0175012	0.001	1.00943	17.5012	17.3376
B2m.2	CACGCCACCCACCGGAGAAT	0.925363	0.98149	1.11602	1.1037	1.0762	1.00775	1.37911	1.36494	11.2751	1.30145	0.942814	8.66343	9.18891
Fas.3	GGCGTCCCAAAGCTTACCAG	0.688285	0.632153	0.706427	0.708456	1.07706	0.605227	1.05168	0.863309	9.69898	1.00004	1.0888	9.69863	8.90767
Wdpcp.4	TTGATAAGCTGCCACCCAAG	0.179717	0.225412	0.138617	0.126528	0.321044	0.169439	0.0917108	0.107276	0.412762	0.0679629	0.797283	6.07334	7.61755
B2m.1	AGTATACTCACGCCACCCAC	0.843272	1.08391	0.897426	1.00726	1.03655	1.04123	1.52527	1.33882	7.36058	1.25887	0.777989	5.84696	7.51547
Wbp5.1	CCGAAGAAACTTTTCGGGAG	0.0694537	0.107206	0.0904686	0.101034	0.0932111	0.0874236	0.0781395	0.0731532	0.11653	0.0383445	0.647852	3.03902	4.69091
Nlrc4.3	CGAGCCCTTATTCAAAGGAT	0.0798664	0.117541	0.0347374	0.146032	0.132898	0.0287814	0.112521	0.0245117	0.0385519	0.0123693	0.679475	3.11676	4.587
Nedd1.1	AAGAGACCGATGAAGTCGTT	0.0361018	0.122989	0.0752771	0.112412	0.110711	0.129424	0.100646	0.1586	0.0822658	0.0658297	0.293536	1.24968	4.25732
Tnfaip3.3	GCTGTCATAGCCTAGGACGA	0.173814	0.147806	0.129859	0.100626	0.161422	0.166355	0.0822045	0.0822182	0.0578264	0.0133081	1.17596	4.34521	3.69503
Lclat1.3	TGATGTCATGAACAGCATCG	0.0297295	0.0594695	0.047159	0.0295826	0.136918	0.0291786	0.0397143	0.0334929	0.072976	0.0425047	0.499913	1.71689	3.43438
Cd86.2	GTGACCTTGCTTAGACGTGC	0.259436	0.410282	0.298674	0.311997	0.475229	0.218909	-	-	-	-	0.632335	2.1709	3.43314
Cyth3.1	CTCCGATGACGGTCTTGTTC	0.066539	0.0920339	0.0847705	0.0711462	0.152301	0.0514398	0.0424319	0.0318924	0.0641559	0.026009	0.722984	2.46668	3.4118
Isg20.4	CCTGGCTTCACCAAATGGCG	0.216188	0.206003	0.186026	0.146242	0.176481	0.129819	0.127514	0.118477	0.205251	0.0574041	1.04944	3.57554	3.40708
Irf1.3	CCCCAAGTACAAACCTTCGG	0.115446	0.0943535	0.196919	0.0838152	0.157889	0.135869	0.220667	0.178751	0.326756	0.0803098	1.22355	4.0687	3.32532
Bag6.4	GAAGCTCCAGGAGTACAGTA	0.161382	0.24231	0.194375	0.181134	0.214312	0.20512	0.16559	0.0711785	0.206459	0.100412	0.666013	2.05612	3.08721
Tnfrsf14.4	CAGGATGGGGGTCGGCACCC	0.209855	0.430756	0.256204	0.458738	0.435354	0.409874	0.320626	0.335834	0.435399	0.292344	0.487179	1.48934	3.05706
Inppl1.1	GCTGCCGATCACCCAACGAG	0.470502	0.547737	0.691632	0.565152	0.726123	0.421891	0.604591	0.437068	0.727856	0.285712	0.858991	2.54752	2.96571
Acvr1b.3	GACTCACCCTGGATCCCCCG	0.612697	0.430923	0.519017	0.332874	0.808406	0.229736	0.398916	0.314944	1.30278	0.324861	1.42182	4.01027	2.82051
Il10rb.1	TGAAAGTCAGGTTCGTTTTG	0.179489	0.127869	0.309746	0.194591	0.254479	0.110338	0.22393	0.134628	0.326602	0.0833844	1.4037	3.91682	2.79036
Cnr2.1	CAAGCCACCGTTGGAGCCGT	0.143901	0.183967	0.122823	0.158433	0.248575	0.247721	0.333864	0.251751	0.19519	0.0912737	0.782212	2.13852	2.73393
Mdk.3	CCGCGGACGTGACCACCAAG	0.463803	0.463029	0.536803	0.422108	0.55063	0.267139	0.357032	0.515893	0.742231	0.275541	1.00167	2.69373	2.68923
Cmtm3.2	GGGCAGCGGTGACACAGCGC	1.00201	0.809863	0.928202	0.783501	0.918178	0.594727	0.791471	0.547624	1.53022	0.460677	1.23726	3.32168	2.68469
Cmtm4.2	TAGAGCAGCCAACACGATTG	0.199394	0.135528	0.154579	0.106439	0.192584	0.101293	0.265039	0.111044	0.393082	0.0998159	1.47123	3.93807	2.67671
Tap1.2	GGTGCCAACGAGCCACTGAG	0.183779	0.0924456	0.137186	0.0626813	0.16227	0.0850054	0.130592	0.155487	0.594535	0.113707	1.98797	5.22865	2.63014
Ifnar2.1	ACATAACAATACGAAATTCC	0.185262	0.20351	0.2035	0.190471	0.336324	0.146535	0.286412	0.194919	0.264549	0.115432	0.910337	2.29181	2.51754
Vav2.2	AAAATGATGACGACGTCTAC	0.268202	0.319096	0.34169	0.256371	0.427074	0.213551	-	-	-	-	0.840505	1.99987	2.37936
Ifngr1.2	GCCAGAGTTAAAGCTAAGGT	0.0958326	0.312556	0.199112	0.176582	0.147665	0.254182	0.0693871	0.167408	0.130641	0.179144	0.30661	0.72925	2.37843
Lax1.2	GGACACTCTATGCATCTGAA	0.11725	0.0871137	0.121859	0.130506	0.240548	0.075662	-	-	-	-	1.34594	3.17924	2.3621
Akap17b.1	CTCACAGGTTCTATACATTC	0.0840796	0.124291	0.116746	0.0912977	0.135278	0.086766	-	-	-	-	0.676476	1.55911	2.30475
Nlrc4.4	TCCACCTGAGAAGCGCCAGG	0.200631	0.338904	0.159853	0.344929	0.291992	0.285476	0.230865	0.233839	0.354268	0.263097	0.591999	1.34653	2.27455
Pycard.4	CTGACAGTGCAACTGCGAGA	0.172288	0.204042	0.141818	0.12186	0.0944677	0.207952	0.0970626	0.0797692	0.113854	0.0595728	0.844374	1.91118	2.26343
Cnr2.4	GCCCAAAGGAACTAACAGGG	0.177217	0.338516	0.195105	0.277719	0.220924	0.273766	0.26212	0.140701	0.243872	0.205918	0.523512	1.18432	2.26225
Lsp1.1	TTCCTCGCATCTGGGATCGA	0.0595038	0.0329998	0.030817	0.0438212	0.0975023	0.0717979	0.0517491	0.0621048	0.135462	0.03378	1.80316	4.01012	2.22395
Il10.1	GCTCTGGCCGACTGGGAAGT	0.547198	0.85993	0.789634	0.768753	0.77459	0.550539	-	-	-	-	0.636328	1.40697	2.21107
Gpd2.2	AGCACTAAATTGATCCACGG	0.0853943	0.146654	0.148469	0.128316	0.221857	0.143268	0.108905	0.187214	0.143877	0.11202	0.582283	1.28439	2.20579
Lclat1.1	TAAACCTGTCGTGGTATCGC	0.112552	0.113374	0.25364	0.112219	0.138997	0.0722676	0.192106	0.111701	0.138179	0.0648743	0.992752	2.12994	2.14549
Ly6e.4	AACTTCAGCGCAGCTGGCCT	0.0781734	0.131634	0.142122	0.123634	0.0883885	0.162526	0.0547963	0.0839309	0.0699538	0.0553678	0.593871	1.26344	2.12746
Il21r.3	CCCTCCAACTACGTGCTGAG	0.0840912	0.315089	0.0559984	0.274669	0.0962695	0.159289	0.07954	0.176416	0.0992174	0.17727	0.266881	0.559696	2.09718
Litaf.3	TGGGCCTGTAATGAGCCCTG	0.11523	0.180672	0.102684	0.176888	0.0665657	0.167627	0.144246	0.0939728	0.145298	0.109147	0.637783	1.33121	2.08725
Ifnar2.3	TCTGGGGACCTTCGTCTAGG	0.122655	0.200441	0.188645	0.0854967	0.128317	0.114048	0.142961	0.153712	0.12594	0.0996543	0.611923	1.26377	2.06525
Tank.3	TCCCCAGGAAAGGCTGTCCG	0.102525	0.144723	0.115203	0.188393	0.255535	0.137737	0.112584	0.161541	0.105161	0.0721755	0.70842	1.45701	2.0567
Tmem109.3	CGCCAGATAGAAGAGCTTAG	0.185028	0.231291	0.0860617	0.161217	0.191844	0.136623	0.112793	0.186453	0.144747	0.0898833	0.799979	1.61039	2.01305
Psen2.2	GGACCGCTACGCATGCAGTG	0.192219	0.173495	0.245254	0.13811	0.181929	0.0742137	0.176687	0.153424	0.168199	0.076577	1.10792	2.19646	1.9825
Il21r.1	CCAGGTGAGACTGAGTATGC	0.126481	0.0651429	0.090118	0.001	0.187728	0.0502634	0.0517749	0.001	0.120332	0.0312991	1.9416	3.84457	1.98011
Capzb.2	CGCCGCCGCCACCATGGTAA	0.140217	0.211276	0.205412	0.0720349	0.0479654	0.140631	0.153989	0.127869	0.13471	0.103184	0.663668	1.30553	1.96715
Nusap1.3	CGCCTTCACCTTAGACTCGG	0.104521	0.122103	0.151073	0.131732	0.12526	0.0899741	0.121997	0.160395	0.124095	0.0738905	0.856006	1.67945	1.96196
Skap2.2	TACCTGGAAAAACGCAGAAA	0.114638	0.220214	0.187311	0.198355	0.163554	0.161635	-	-	-	-	0.520577	1.01188	1.94376
Tgfb1.4	GCCACTCAGGCGTATCAGTG	0.427249	0.702158	0.423541	0.394045	0.547011	0.464443	-	-	-	-	0.60848	1.17778	1.93561
Il10.3	GGATCATTTCCGATAAGGCT	0.102043	0.2013	0.153101	0.16007	0.164732	0.167924	-	-	-	-	0.50692	0.980989	1.9352
Socs5.3	GGGCGTGATGGACCGATACG	0.323859	0.305604	0.405244	0.445348	0.357629	0.334133	0.257837	0.325061	0.635663	0.310178	1.05974	2.04935	1.93383
Cd22.4	TGTGAATCCGAGCTGCCCGG	0.620513	0.559703	0.604579	0.58174	0.597318	0.279046	-	-	-	-	1.10865	2.14057	1.93079
Klf6.1	ACCAAATTCATTCTAGCTCG	0.153744	0.18347	0.177378	0.184943	0.232035	0.14427	-	-	-	-	0.837978	1.60833	1.9193
Fyn.4	TCCATACAGGGCCGCTTCGG	0.089052	0.0984823	0.0742191	0.130672	0.0688181	0.10325	0.0386993	0.068281	0.0469692	0.0270691	0.904243	1.73516	1.91891
Aip.2	GAGCCTCCGCAACATCGCCG	0.540703	0.692565	0.703613	0.542786	0.826949	0.554985	-	-	-	-	0.780725	1.49004	1.90853
Cxcr5.3	GCCTTAAAGGACGTCAGTAA	0.0816466	0.158705	0.117839	0.121246	0.0929989	0.0977086	-	-	-	-	0.514455	0.951798	1.85011
Tnfaip3.1	CAGGACTTTGCTACGACACT	0.0343933	0.137541	0.0503202	0.135581	0.0339886	0.128007	0.0330699	0.0963165	0.0341997	0.0742621	0.250059	0.460526	1.84167
Il2rg.1	AACGGTACACATTTCGGGTT	0.106981	0.133528	0.133963	0.0665862	0.101595	0.0762478	0.089265	0.0622464	0.0625931	0.0427314	0.801187	1.4648	1.82829
Fadd.3	GCAGCGCCTGGACGACTTCG	0.575113	0.703455	0.703586	0.894521	0.780082	0.689871	0.5359	0.754337	0.70793	0.474309	0.817556	1.49255	1.82563
Pik3cg.2	TATCCGGGATGCCCTCACCG	0.283075	0.41281	0.517118	0.323643	0.550402	0.35482	0.724199	0.473973	0.534675	0.427382	0.685727	1.25105	1.82441
Tap1.1	AGTGATGCGGCCCGTGAAGA	0.168886	0.121551	0.113327	0.190922	0.233573	0.111601	0.162926	0.241472	0.473539	0.190074	1.38943	2.49134	1.79307
Skap2.3	ATCTTTATCGTAGCGCTCTG	0.269716	0.373606	0.278046	0.25348	0.296833	0.229498	-	-	-	-	0.721926	1.2934	1.7916
Card11.2	GAGAGGCGGGGGCTGACTCG	0.394265	0.409343	0.553954	0.382793	0.589165	0.343507	-	-	-	-	0.963165	1.71515	1.78074
Slc12a4.4	ATCCAGGGGGGCTTACCCGG	0.168161	0.139733	0.187547	0.138592	0.151015	0.117319	0.157781	0.122479	0.175962	0.0824534	1.20344	2.13408	1.77332
Crlf2.1	ATATCGCGGGCAGGGTTGCA	0.701923	0.664805	0.690945	0.638452	0.753945	0.691562	0.780571	0.446001	0.890855	0.479261	1.05583	1.85881	1.76051
Tnfrsf14.2	TGCGCTGCAGCAAGTTCAAA	0.112214	0.240763	0.218444	0.12162	0.186107	0.148993	0.227416	0.165582	0.114898	0.140186	0.466076	0.819612	1.75854
Tgfbr2.3	GTGCTGTGAGACGGGCTTCG	0.532438	0.806501	0.697514	0.779327	0.645499	0.77521	1.02844	0.812223	0.857673	0.739859	0.660183	1.15924	1.75594
Cd40.1	ACGTAACACACTGCCCTAGA	0.189786	0.152603	0.146968	0.22318	0.233996	0.10718	-	-	-	-	1.24366	2.18321	1.75547
Fas.4	TGTGCTGGTACCAATCTCAT	0.465947	0.392204	0.426066	0.402498	0.471972	0.455606	0.611807	0.619613	1.09871	0.531938	1.18802	2.06548	1.73859
Il3ra.1	GACAACAGCTGCGGTCCGTG	0.438274	0.3839	0.429471	0.249681	0.491763	0.335162	0.461985	0.247704	0.328497	0.165691	1.14163	1.98258	1.73662
Cd79a.1	TGGACCCCCTTCTACCCGCA	0.369409	0.47272	0.420752	0.458646	0.667165	0.491646	-	-	-	-	0.781453	1.357	1.73651
Cebpg.4	GCTGTAGTTTCCGTGCTGAT	0.33825	0.295759	0.291526	0.288488	0.423295	0.214897	-	-	-	-	1.14367	1.96976	1.72232
Tank.2	ACGTCGCTCTAAGATTTGAG	0.135489	0.208823	0.0714037	0.215369	0.148093	0.208923	0.183279	0.198219	0.132479	0.1203	0.648824	1.10124	1.69729
Atg12.4	TCGGCTCCTGTAGGAGCCGG	0.0636007	0.089507	0.0415358	0.0596433	0.0432212	0.0920934	0.104697	0.0255319	0.0311445	0.0262121	0.710567	1.18817	1.67214
Cmtm3.1	GGACACCACGTAGCAGATGA	0.323878	0.327352	0.269084	0.271126	0.315146	0.170135	0.47008	0.209997	0.316091	0.191101	0.989387	1.65405	1.6718
Prkd2.2	AAGATGCGCCCAGTGCCCCG	0.735652	0.797002	0.873567	0.533147	0.614388	0.509027	1.06166	0.48896	0.602228	0.392556	0.923024	1.53412	1.66206
Cdk2ap1.2	TCACTCACCGGCGTTGAGGG	0.153739	0.135821	0.106451	0.0775347	0.104789	0.075895	0.115027	0.0563175	0.0857074	0.0462936	1.13193	1.85139	1.63561
Ttc3.1	TAATCGTCAGTGGTAAAGTC	0.101248	0.180965	0.113865	0.146763	0.116469	0.214075	0.188482	0.163076	0.164584	0.180148	0.559491	0.913607	1.63292
Socs5.4	TACTCGCGGCACGCCCCGTG	0.662122	0.657364	0.747531	0.509738	0.515372	0.267756	0.569726	0.246953	0.429024	0.264863	1.00724	1.61979	1.60815
Gpr65.1	GGAACAAATAGTGTTCGAGG	0.131293	0.158231	0.112049	0.128769	0.146901	0.0595443	0.229199	0.0923001	0.130077	0.0984006	0.829755	1.32191	1.59313
Rps6ka4.1	GGAGAACTTCGCGCTGCTCA	0.610545	0.461632	0.750217	0.343961	0.453473	0.296112	0.537211	0.378825	0.631386	0.299945	1.32258	2.10501	1.59159
Nrp.2	CAGTGCGCTTAGCCCCTTTA	0.0470332	0.113495	0.0477324	0.130743	0.0504865	0.106801	0.001	0.0976259	0.0392561	0.0597236	0.414406	0.657296	1.58611
Adam19.1	GACTTCAGCGTGCTGGTTTG	0.198358	0.153761	0.134542	0.153199	0.182756	0.118764	0.114491	0.0907406	0.108608	0.0539779	1.29004	2.01208	1.55971
Aimp1.1	GCAGTACAGTTCGTCTGCAG	0.295186	0.371652	0.343896	0.389789	0.422521	0.233181	0.257976	0.455258	0.495833	0.400288	0.794253	1.23869	1.55957
Stat6.4	GTCGCTAAAGCGGAGGAGGA	0.449574	0.416394	0.361252	0.440607	0.505242	0.300863	-	-	-	-	1.07968	1.67931	1.55537
Ripk2.1	TGCAGGATGCGGAATCTCAA	0.303726	0.25419	0.338138	0.206167	0.292106	0.122765	0.229673	0.157036	0.36644	0.199166	1.19488	1.83987	1.5398
Ypel2.2	CCATTGGCGCTGCTGAGCGT	0.141463	0.236337	0.167588	0.150521	0.170445	0.162274	0.115659	0.160194	0.118258	0.128454	0.598567	0.920628	1.53805
Tnfrsf13c.1	ATGTCGCCGCCTCATGCAGC	0.486713	0.792834	0.585195	0.586722	0.497656	0.527283	-	-	-	-	0.61389	0.94381	1.53743
Pfn1.1	CCCATCAGCAGGACTAGCGC	0.0964796	0.0833905	0.143501	0.0243594	0.143305	0.125668	0.0476473	0.0514334	0.122397	0.0690883	1.15696	1.77161	1.53126
Ripk2.3	ACATCGACCTGACACCAGTG	0.0999315	0.0607354	0.140116	0.115769	0.123391	0.143743	0.0953463	0.0976581	0.299631	0.11908	1.64536	2.51622	1.52928
Sema4d.2	GGTAGTGTTGAGAACCGCGG	0.424053	0.565171	0.604992	0.532986	0.514522	0.448482	-	-	-	-	0.75031	1.14725	1.52904
Leprot.4	AGAGACATGGCGGGCGTTAA	0.256992	0.3838	0.21047	0.160325	0.386174	0.123483	0.229423	0.0845835	0.271208	0.267694	0.6696	1.01313	1.51303
Prkce.3	TGTGGCAGCGCAGAACGGGG	0.843115	0.85749	0.730797	0.867512	0.780712	0.890163	0.746718	0.655295	1.13789	0.766713	0.983236	1.48411	1.50942
Bag6.1	GCCATCACCAGCCGGACCCG	0.814917	0.661702	0.756083	0.563471	1.09765	0.572576	0.66282	0.515974	0.937539	0.504468	1.23155	1.85847	1.50906
Swap70.4	GCTGCGGTCCAGGTCGAGCG	0.612446	0.674735	0.719429	0.611698	0.739399	0.541366	-	-	-	-	0.907684	1.3658	1.50471
Ctrl40.1	CTCCGTGGGATATTGCTGGT	0.0467786	0.187039	0.0885422	0.147202	0.116309	0.196868	0.0368684	0.174237	0.0657972	0.176102	0.250101	0.373631	1.49392
Malt1.1	CGCTTCTCAACCCCCCAGGT	0.358916	0.557661	0.387306	0.428305	0.449927	0.472428	-	-	-	-	0.643609	0.952371	1.47973
Aoc2.2	CTGGGCTCCGCATGTCGTTC	0.126524	0.210014	0.199241	0.195615	0.236391	0.306048	0.295065	0.157855	0.194435	0.218778	0.602455	0.888735	1.47519
Syk.2	GGCACCTACGCCATCTCCGG	0.878949	0.930611	0.860977	0.768289	1.06694	0.765868	-	-	-	-	0.944486	1.39311	1.475
B4galnt1.1	CTAGCGCATAGAGGGCCCGG	0.202627	0.132585	0.203443	0.139851	0.20307	0.233324	0.17901	0.128059	0.256937	0.115068	1.52828	2.23291	1.46106
Prkcz.2	GCCAGGTGAGTCCATGGCCG	0.512392	0.46566	0.578924	0.49382	0.447568	0.530437	0.576493	0.347786	0.483214	0.302424	1.10036	1.59781	1.45208
Acat1.1	TGGATGCATAACTTCGTTCC	0.171513	0.153372	0.10783	0.135208	0.126441	0.139106	0.153179	0.223691	0.148224	0.0918783	1.11828	1.61326	1.44263
Tgfb1.3	CAACAGCACCCGCGACCGGG	0.734346	0.663242	0.917668	0.743726	1.07801	0.680692	-	-	-	-	1.10721	1.5837	1.43035
Mdk.4	AAAGGTCAGCGAATATGGTG	0.243764	0.350417	0.311899	0.178494	0.282726	0.344517	0.205491	0.215692	0.220963	0.223554	0.69564	0.988408	1.42086
Ube2n.2	ATCAAGGTAACCGCCCAGGC	0.450079	0.54694	0.602514	0.53321	0.575253	0.49209	-	-	-	-	0.822904	1.169	1.42058
Cd83.1	CAAGCAAAACAGCTCCTTCG	0.203161	0.257023	0.265754	0.183764	0.151991	0.241575	0.306167	0.237087	0.179133	0.159711	0.790439	1.12161	1.41897
Alcam.1	TGAGGTACATCGAGACGGCA	0.0538028	0.0960857	0.0929367	0.117362	0.248201	0.0838702	0.121638	0.118093	0.130625	0.164961	0.559946	0.791854	1.41416
Lat2.4	ATCAGTGGCGAGAGTCCAAG	0.455213	0.654032	0.437304	0.368132	0.398741	0.406524	-	-	-	-	0.69601	0.980853	1.40925
Icosl.3	AAACCTGTATAGCTTCGGTG	0.205536	0.193907	0.205498	0.198355	0.2424	0.162632	-	-	-	-	1.05997	1.49048	1.40615
Myb.1	AACGCTTCGGACCATATTTC	0.157603	0.184496	0.124473	0.161056	0.136522	0.163157	0.0428217	0.125915	0.136141	0.114195	0.854235	1.19219	1.39562
Wdpcp.3	GGCAGAAGATTACTCACCGA	0.142886	0.183207	0.118643	0.163358	0.130435	0.193742	0.162031	0.162241	0.152685	0.140435	0.779914	1.08723	1.39404
Lax1.3	CATCCAAGAGAATCGACCCA	0.25348	0.377311	0.367832	0.268381	0.256967	0.274816	-	-	-	-	0.671806	0.935052	1.39185
Stat5b.1	TCTGGTGAAGGGCATCGCCC	0.530913	0.659666	0.63076	0.690114	0.721345	0.645774	-	-	-	-	0.804821	1.11702	1.38792
Skap2.1	GAATATGACGATCCCTTTGC	0.425288	0.423012	0.279414	0.421592	0.43125	0.309156	-	-	-	-	1.00538	1.39493	1.38746
Leprotl1.3	AGCCGAGACGACGATGCCTG	0.261248	0.485122	0.424628	0.274731	0.32912	0.35551	0.374198	0.330262	0.229491	0.307292	0.538521	0.746817	1.38679
Bag6.3	GATTCACCCCGCGAGACATG	0.215313	0.529028	0.261499	0.419112	0.344298	0.548787	0.287947	0.808196	0.255191	0.453717	0.406997	0.562445	1.38194
Endod1.1	ACCTCCTCGAGGTTGCTGTC	0.0270045	0.0294577	0.042739	0.0213071	0.0507908	0.024036	0.100613	0.0285084	0.0400552	0.0319589	0.916721	1.25333	1.36719
Camk1d.3	GATATAGGCGATCACCCCGA	0.265659	0.226652	0.424806	0.148444	0.337262	0.118471	0.409654	0.193431	0.199994	0.125703	1.1721	1.59101	1.3574
Spp1.4	GTCGATGTCCCCAACGGCCG	0.44922	0.467654	0.351841	0.382586	0.34056	0.405363	0.313976	0.444814	0.447854	0.344014	0.960584	1.30185	1.35527
Acvr2a.4	CTTGCCAGCCTCGAACTTTA	0.0703079	0.144036	0.130058	0.12162	0.129202	0.0752085	0.0540861	0.0942881	0.0563392	0.0852104	0.488127	0.661178	1.35452
Atp5c1.3	CTGAAGCCTGCCCGAGTGTA	0.056962	0.131419	0.0661278	0.0924492	0.0665188	0.130252	0.101755	0.0734539	0.0430349	0.073417	0.433438	0.586171	1.35237
Bcr.4	GCGGCACAGCCATATCCAGG	0.622197	0.702499	0.697866	0.722234	0.669634	0.562384	-	-	-	-	0.885691	1.19071	1.34438
Cd48.2	TACGTTTATATGGTCCAAGT	0.199313	0.31176	0.270986	0.30196	0.275405	0.301637	0.514745	0.379642	0.297825	0.346998	0.639316	0.858291	1.34252
Prkcb.1	CTCCTGCCCCGGTGCGGACA	0.56739	0.37041	0.543241	0.531838	0.461041	0.495419	0.390546	0.420533	0.48356	0.235367	1.53179	2.05449	1.34124
Tgfb1.1	CTCTGCACGGGACAGCAATG	0.398934	0.512371	0.353398	0.45017	0.447194	0.430452	-	-	-	-	0.778604	1.0389	1.33431
Igbp1.2	AAGCAGATGATGAGCGCGTT	0.428061	0.474477	0.576254	0.432903	0.589991	0.49189	-	-	-	-	0.902173	1.19944	1.3295
Bank1.4	TCAGAGCACGGCCAGCACGT	0.746947	0.924731	0.74503	0.80061	0.866173	0.807484	-	-	-	-	0.807746	1.07268	1.32799
Pon2.3	ATGAAAGTGCTAATGCCATG	0.146321	0.164753	0.201421	0.240496	0.137311	0.176322	0.19686	0.185217	0.190882	0.16232	0.888119	1.17596	1.3241
Faim3.1	GAGTGGGCATTCGATGATAA	0.177356	0.199903	0.152244	0.111314	0.301614	0.240724	0.294337	0.186354	0.175356	0.149773	0.887209	1.17081	1.31966
Prkcb.3	CGTGCCGCCCGAAGGAAGCG	0.528419	0.554044	0.642768	0.455869	0.731229	0.456282	0.81201	0.491093	0.568054	0.451721	0.953749	1.25753	1.31852
Pfn2.1	ATTGTAGGAAAAGACCGGGA	0.062897	0.132355	0.0911199	0.143367	0.0772729	0.187417	0.177044	0.089538	0.0926022	0.148204	0.475214	0.624829	1.31484
Ticam1.3	TCCGGCCTCCACAAGGGACA	0.384072	0.460973	0.485198	0.434533	0.580773	0.530985	-	-	-	-	0.833176	1.09377	1.31277
Il6st.2	GCCCAGCATCTCCAGCAACG	0.390249	0.251644	0.33516	0.27382	0.548821	0.319036	0.205482	0.392077	0.597139	0.293533	1.5508	2.03431	1.31179
Ect2.4	GGTGAGCACCCTTGCGACCG	0.191781	0.283503	0.257502	0.259796	0.317317	0.180633	0.203138	0.110784	0.155789	0.176234	0.67647	0.88399	1.30677
Map4k2.1	GTTGCGGGACGTGTCGCTGC	0.682246	0.683127	0.758806	0.982138	0.876216	0.725208	0.779818	0.877307	1.23266	0.946369	0.99871	1.30252	1.3042
Cklf.2	CGACGGCTTACGACCGGCCG	0.35986	0.574969	0.318626	0.432139	0.283812	0.531643	0.398522	0.629485	0.372943	0.458435	0.625878	0.813513	1.2998
Tbc1d4.3	GAAGCCCATCAGCGACCAGG	0.119594	0.145521	0.286716	0.131086	0.208275	0.119843	0.172674	0.13175	0.189765	0.177652	0.82183	1.06818	1.29976
Naip6.1	CGGGATGAATCTAGTTCAGC	0.114091	0.248316	0.142884	0.0802499	0.11946	0.14527	0.129261	0.0662811	0.0556724	0.093557	0.45946	0.595064	1.29514
Hdac5.1	GCAGCCCACCACTCACCCGG	0.578507	0.723046	0.581435	0.557839	0.669894	0.649416	-	-	-	-	0.800098	1.03153	1.28926
Il6st.4	CCTATGGATCCGAGCAACGG	0.104358	0.180881	0.164095	0.116276	0.196762	0.158012	0.151731	0.182069	0.172865	0.232444	0.576945	0.743684	1.289
Bmpr2.4	CTCGCTGCATCGGCCCTTTC	0.240281	0.358316	0.255317	0.228434	0.212779	0.336696	0.301766	0.126764	0.175802	0.205287	0.670583	0.856371	1.27705
Rps6ka5.4	GCTCCAGATATTGTCAGAGG	0.307532	0.448741	0.262689	0.242621	0.299903	0.312926	0.231486	0.137512	0.194291	0.222463	0.685321	0.873363	1.27439
Tlr4.4	ATAAAAGCTCATTCATTACC	0.0391717	0.0931834	0.0852083	0.0964482	0.048445	0.0905778	-	-	-	-	0.420372	0.534843	1.27231
Lax1.4	TTCAGCAAACTCCAGCCGCA	0.674675	0.679129	0.534977	0.495371	0.589374	0.467806	-	-	-	-	0.993442	1.25987	1.26819
Isg20.2	GCACGACTTCAATGCCCTGA	0.136706	0.218276	0.22642	0.202783	0.125519	0.157205	0.162989	0.189232	0.180034	0.227355	0.626298	0.791863	1.26436
Syk.3	GCGCATGATCGGAATCTGCG	0.688911	0.820408	0.553697	0.634272	0.647408	0.611302	-	-	-	-	0.839718	1.05906	1.26121
Plagl1.2	GCTCCCGAGAACGGGCTTGA	0.0667867	0.0916365	0.0705729	0.0663057	0.0654366	0.0928199	0.0614091	0.0590349	0.0470074	0.051329	0.728822	0.915806	1.25656
Jak2.3	ACAACCTCAGCGGGACTAAG	0.208885	0.255012	0.171429	0.222962	0.262118	0.262459	0.181877	0.259837	0.236645	0.229972	0.819117	1.02901	1.25625
Tlr4.2	TGGCTGGTTTACACGTCCAT	0.462885	0.598816	0.517409	0.388571	0.443701	0.459061	-	-	-	-	0.773001	0.96654	1.25037
Tpd52.2	CATGCTAATCGAATGCTGAA	0.0641184	0.0996324	0.0604721	0.0708568	0.114442	0.142909	-	-	-	-	0.64355	0.800802	1.24435
Ier5.4	GAGGGGGACTACGCGTCACC	0.249092	0.251749	0.256801	0.145236	0.213764	0.179957	0.397278	0.195763	0.146781	0.119683	0.989449	1.22641	1.23949
Tlr4.1	TCTCTAGAAAGCTTCCCTAT	0.0625205	0.0652282	0.0725856	0.107095	0.138679	0.117182	-	-	-	-	0.958489	1.18345	1.2347
Lat2.3	GGACAGCTTTACCTGACTCG	0.323783	0.422526	0.431738	0.370319	0.358233	0.381278	-	-	-	-	0.766303	0.939557	1.22609
Icam1.3	TTTCTCATGCCGCACAGAAC	0.719846	0.683776	0.688024	0.682347	0.613434	0.848503	0.85107	0.976397	0.985671	0.76552	1.05275	1.28758	1.22307
Card11.1	TCCATGTAGTCATCCATAGC	0.124946	0.161052	0.160448	0.111124	0.129417	0.136418	-	-	-	-	0.775811	0.948682	1.22283
Socs6.2	GTCAGCCGTACCCCTGCCGG	0.814514	0.829588	0.894882	1.00574	1.17662	0.801058	0.867855	0.679415	0.868115	0.723996	0.98183	1.19906	1.22125
Tnfrsf13c.3	ATCTTCTTTGAGCGGAGGCC	0.499774	0.606007	0.448643	0.633505	0.537775	0.536408	-	-	-	-	0.824701	1.00255	1.21565
Ifngr1.4	TCGGAGAGATTACCCGAGGG	0.129948	0.212211	0.0787426	0.169065	0.0757257	0.0916527	0.108978	0.100211	0.10705	0.143846	0.612356	0.7442	1.21531
Cr2.1	TCTCCAATGAGGCGGTAGCT	0.493963	0.366632	0.461204	0.380611	0.528252	0.323362	-	-	-	-	1.3473	1.63362	1.21251
Il9r.1	CTGGGAAGATGCATTGCGGA	0.133654	0.437233	0.193197	0.324376	0.241491	0.241866	0.228453	0.361483	0.133641	0.361062	0.305682	0.370132	1.21084
Atg5.2	GCCTCAACCGCATCCTTGGA	0.287341	0.279633	0.238886	0.0698616	0.389285	0.173014	0.0964742	0.172223	0.163597	0.131596	1.02757	1.24317	1.20982
S100a1.1	GTTCCATGCCCATTCGGGCA	0.0578646	0.0816965	0.0939869	0.0894321	0.0377331	0.0505484	0.156679	0.11642	0.0429178	0.0501351	0.708287	0.856043	1.20861
Swap70.1	CAGCACCGTGCACAGGTTAT	0.419631	0.373356	0.292045	0.271386	0.512873	0.378346	-	-	-	-	1.12394	1.35557	1.20608
Irf1.2	CCTCACAGCCGCAACAGACG	0.148213	0.225365	0.217511	0.311901	0.210175	0.220488	0.21607	0.336099	0.202642	0.25638	0.657656	0.790397	1.20184
Bst2.4	GAACAGGACCACCAAGATCG	0.561861	0.597087	0.63639	0.627418	0.625799	0.553444	-	-	-	-	0.941002	1.13074	1.20163
Cd22.1	AGACGCCCCCAGAGACGTGA	0.695276	0.689291	0.670267	0.692851	0.770885	0.638621	-	-	-	-	1.00868	1.20711	1.19672
Card11.4	GCGCTACGCCCAGCTCAGTG	0.642172	0.535196	0.542076	0.543995	0.811563	0.565752	-	-	-	-	1.19988	1.43449	1.19552
Tnfrsf1b.4	GGGTTGAACCCAACGATGTA	0.257511	0.279898	0.403966	0.249199	0.394975	0.336433	0.436805	0.385518	0.450403	0.409965	0.920016	1.09864	1.19415
Bst2.1	GGAGCAGCAGGCCCGCATCA	0.726262	0.718627	0.609013	0.486944	0.638797	0.530843	-	-	-	-	1.01063	1.20336	1.19071
Stat5b.2	GTCCCTCGCTGACCGCCTGG	0.6202	0.554845	0.503776	0.545612	0.747058	0.561422	-	-	-	-	1.11779	1.33065	1.19043
Csf2ra.4	GCTGAGGACACGCGAGTGCC	0.669673	0.648635	0.681096	0.60219	0.62067	0.784189	0.661228	0.689363	0.742798	0.606391	1.03243	1.22495	1.18647
Rpa2.4	TGCCAGTGGTGAGAACGCCG	0.222363	0.214708	0.262834	0.218663	0.268678	0.221983	0.294438	0.236851	0.226066	0.184018	1.03565	1.2285	1.18621
Cd79a.4	CCTCCGCGTGCGCAGTGAGT	0.622818	0.639799	0.504671	0.665327	0.690008	0.597623	-	-	-	-	0.973458	1.15459	1.18607
Hdac9.4	GTCGGTGGCGGGGCAATTTG	0.672318	0.729283	0.937191	0.62489	0.747367	0.683609	-	-	-	-	0.92189	1.09327	1.1859
Stat5b.3	GGTCCCCCAGGCGGTCAGCG	0.521932	0.66922	0.637825	0.631888	0.583364	0.631925	-	-	-	-	0.77991	0.923154	1.18367
Nhej1.1	ACCAGCCGAGCTCTATGCAT	0.321359	0.386425	0.259672	0.230202	0.258452	0.265681	-	-	-	-	0.831619	0.972792	1.16976
Flt3l.4	TAGGGCTATGGGACTCCTTG	0.164082	0.208486	0.168071	0.262477	0.279705	0.20159	0.280153	0.13384	0.266025	0.28898	0.787017	0.920564	1.16969
Icam1.1	CAGGGATCACAACGGTGACC	0.838482	0.81121	0.864027	0.814947	0.919376	0.896355	1.22257	1.19235	1.52075	1.26061	1.03362	1.20636	1.16712
Cd19.1	TCACGTGCCTCTCGATGGTC	0.66429	0.598302	0.707524	0.570113	0.631737	0.488368	-	-	-	-	1.11029	1.29357	1.16507
Tgfbr1.3	ATGAGGAGCTGCGGACGACG	0.562258	0.659137	0.59965	0.590365	0.638846	0.590141	0.61306	0.75398	0.663058	0.670215	0.853021	0.989322	1.15979
Card11.3	GCAGCTGAGCCTGATACGGG	0.561532	0.443598	0.407517	0.444172	0.656448	0.447414	-	-	-	-	1.26586	1.46721	1.15906
Cd19.3	CCAGAAGTCCTTACTGGTGG	0.243065	0.370283	0.409507	0.294665	0.216469	0.2853	-	-	-	-	0.656429	0.758743	1.15586
Marcks.1	CGTCCCCGTTCACTTTTACG	0.107057	0.0543617	0.0863415	0.0751653	0.0982008	0.0389707	0.0513648	0.0864036	0.105808	0.0465278	1.96934	2.27408	1.15474
Aicda.2	GTAGGAACAACAATTCCACG	0.106601	0.0953414	0.0967832	0.174629	0.112367	0.0871078	-	-	-	-	1.11809	1.28998	1.15373
Dnase1.3	CTTCAACATTCGGACTTTTG	0.176263	0.146972	0.181359	0.0996773	0.177512	0.128852	-	-	-	-	1.1993	1.37764	1.14871
Lax1.1	TACAGGCAGCTATGATGACC	0.323459	0.370283	0.294315	0.43962	0.371675	0.371443	-	-	-	-	0.873544	1.00063	1.14548
Pik3cd.1	GGCCTGTGCCCTCCGAAAAA	0.644169	0.811303	0.631433	0.898802	0.646513	0.711175	-	-	-	-	0.793993	0.909078	1.14494
Aldh4a1.1	GGTGTGCTTCCATCGTAGCC	0.13803	0.116847	0.21405	0.114076	0.27967	0.161689	0.176882	0.147123	0.152685	0.112994	1.18129	1.35127	1.14389
Tnfrsf13b.1	CTGCCCCAAAGATCAGTACT	0.167792	0.225539	0.154063	0.219458	0.226348	0.266058	-	-	-	-	0.743961	0.850745	1.14353
Pik3r1.2	AAAGCGGAGAACCTATTGCG	0.503074	0.524806	0.656427	0.406707	0.531118	0.490819	-	-	-	-	0.958591	1.08211	1.12885
Syk.4	TGGCACCTACGCCATCTCCG	0.529517	0.498841	0.489667	0.430833	0.486359	0.406484	-	-	-	-	1.06149	1.1965	1.12718
Ap3d1.4	TGTGCAGAGCGCCGACCTGG	0.938417	0.963429	1.08651	0.878967	0.935245	0.854102	1.26516	1.35104	1.09607	0.999818	0.974038	1.09627	1.12549
Acvr1b.2	CACTGTGCGCTGGACAAAAA	0.10962	0.155271	0.117469	0.135522	0.109066	0.160175	0.118654	0.117874	0.126372	0.159422	0.705991	0.792688	1.1228
Cd40.4	CCTCGGCTGTGCGCGCTATG	0.483177	0.474815	0.438416	0.561679	0.501704	0.440339	-	-	-	-	1.01761	1.13936	1.11964
Casp3.3	GGCTTGCCAGAAGATACCGG	0.104863	0.110208	0.109301	0.189036	0.0814299	0.153925	0.0760057	0.12394	0.171125	0.161107	0.951495	1.06218	1.11633
Btla.3	CCAGATGCCACCAATGCCTC	0.587803	0.632605	0.521441	0.601515	0.664874	0.572215	0.752696	0.776146	0.643842	0.623025	0.929179	1.03341	1.11218
Mbp.2	GACAGGGGTGCGCCCAAGCG	0.955522	1.1228	1.01361	1.05929	1.00017	1.00869	1.46571	1.38066	1.27955	1.35864	0.851014	0.941789	1.10667
Atp5c1.1	CCTGTCCCATACACTCGGGC	0.0896469	0.104898	0.0631187	0.106711	0.0367403	0.0808743	0.0629138	0.0757519	0.0917733	0.0970961	0.854611	0.945179	1.10598
Csf2ra.2	GAGCCGGCGTCCGGTGTGGT	0.474353	0.854273	0.36117	0.721092	0.634929	0.644764	0.618159	0.544875	0.347122	0.565403	0.555271	0.613937	1.10565
Bank1.1	ACTGACACTTCTTTGGCGTC	0.355342	0.392916	0.349166	0.335402	0.363438	0.364166	-	-	-	-	0.904372	0.998001	1.10353
Sema4d.4	GGATGTGTGCCCCCGTTAGG	0.37674	0.357549	0.424456	0.398969	0.399431	0.344064	-	-	-	-	1.05367	1.16092	1.10178
Rnf11.2	CATCCGAAGTCGGGGATTTG	0.128913	0.0729938	0.136698	0.092924	0.0740206	0.0794926	0.149521	0.13008	0.116647	0.0599739	1.76609	1.94496	1.10128
Ccnd3.4	GACCAAAGCCTGCCGGTCAC	0.797766	0.892696	0.795137	0.83608	0.732558	0.733835	1.12269	1.11906	0.942174	0.959386	0.893659	0.982059	1.09892
Map4k2.3	GTGGCGGCATTCACGAAGGA	0.395486	0.478472	0.851395	0.594166	0.640309	0.58893	0.361358	0.508213	0.513018	0.56599	0.82656	0.906408	1.0966
Il22ra1.2	ATCTGAATGGACCTCACTTT	0.127815	0.177103	0.245937	0.214046	0.204282	0.24867	0.170199	0.113814	0.0673204	0.0851204	0.7217	0.790885	1.09586
Vav1.3	GCTCATCTGTAAACGCCGCG	0.773865	0.780138	0.540459	0.593064	0.62333	0.573603	-	-	-	-	0.991959	1.08669	1.0955
Cxcr4.4	AGCTTTTGAACTTGGCCCCG	0.559809	0.701518	0.631888	0.691534	0.782272	0.775738	0.944562	0.955478	0.688132	0.787497	0.797997	0.873821	1.09502
Akap17b.2	AACTCTCAAAGACTACTCGG	0.175186	0.199403	0.146834	0.251695	0.234588	0.244684	-	-	-	-	0.878553	0.958738	1.09127
Pml.3	GCTGGGCCAGGACTGCTCGG	0.440129	0.861408	0.509316	0.671892	0.475467	0.825357	0.662428	0.623441	0.388805	0.697747	0.510942	0.557228	1.09059
Mdk.2	CTTCCGCGAGGGTACCTGTG	0.195393	0.27803	0.228365	0.241483	0.125817	0.197059	0.249966	0.164429	0.172644	0.225543	0.702779	0.765457	1.08918
Tnfrsf8.2	GCTGTGTCGGAGACAACCCT	0.119045	0.211637	0.2229	0.153178	0.133947	0.18254	0.280361	0.235874	0.067759	0.110637	0.562495	0.612443	1.0888
Pik3r1.1	AGCGTTGCCCCTTCCTGACC	0.518889	0.616131	0.548169	0.735418	0.574556	0.626774	-	-	-	-	0.842173	0.916687	1.08848
Fth1.1	GGAAGATTCGGCCACCTCGC	0.231431	0.26557	0.32057	0.323746	0.191909	0.252749	0.452957	0.294683	0.20224	0.21384	0.871452	0.945754	1.08526
Acvr1b.1	CCCCACATGGAGGGGTGCGC	0.517175	0.653636	0.518641	0.402465	0.504248	0.498633	0.350533	0.501488	0.401765	0.468602	0.791227	0.85737	1.0836
Psmb9.4	CACCTACCGCCGGCTCGTTC	0.23306	0.296115	0.234892	0.264587	0.325669	0.367649	0.190919	0.271319	0.252136	0.295718	0.78706	0.852623	1.0833
Ly6e.3	TGTCAATCTCAATCTCGGTG	0.159129	0.190581	0.101394	0.17184	0.12544	0.156494	0.0813285	0.181698	0.0987401	0.109271	0.834969	0.903624	1.08222
Il10.4	CTTTAAGGTAAGAGTCCGGT	0.230135	0.279068	0.181669	0.232685	0.218939	0.245592	-	-	-	-	0.824658	0.891474	1.08102
Cd180.1	GTTGAGTTTGGTAAAGTGCC	0.164115	0.219301	0.164185	0.270705	0.178686	0.22095	-	-	-	-	0.748355	0.808716	1.08066
Hdac5.4	GCATCCCTGTGGCAGGTAAG	0.475227	0.486575	0.572258	0.405684	0.547011	0.520359	-	-	-	-	0.976679	1.05122	1.07632
Myd88.2	GGGACCCGGATCCCACGCGG	0.902932	0.741018	0.977286	0.758499	0.822452	0.720164	0.972906	0.788527	0.680312	0.518802	1.2185	1.31131	1.07617
Ctsd.3	GACCCAGAAGGGCAACCCGG	0.061475	0.10709	0.0591036	0.0950993	0.0541218	0.106899	0.0505535	0.0790838	0.0277118	0.0449058	0.574049	0.61711	1.07501
Cmtm3.3	CCCATGATGGTAAGGATCGG	0.204026	0.119358	0.17462	0.190943	0.237085	0.100263	0.24259	0.173892	0.140309	0.076477	1.70936	1.83466	1.0733
Ltb.1	GGCCTTGGTGCCGCAGGATC	0.17727	0.147091	0.159223	0.131726	0.127619	0.120477	0.0307244	0.074238	0.154562	0.119501	1.20518	1.2934	1.07321
Il10.2	GCTAACCGACTCCTTAATGC	0.125636	0.222505	0.127708	0.219077	0.103107	0.170377	-	-	-	-	0.564642	0.605172	1.07178
Pag1.3	CGGAGTGGAGGGGCCCTACG	0.93284	1.06721	1.00076	0.929154	0.990997	0.917144	1.28118	1.29769	1.09056	1.16417	0.874093	0.936769	1.0717
Inpp5b.4	CTTTCACGATACCCCAAAGG	0.11266	0.0983196	0.0489906	0.0696274	0.0646695	0.093147	0.0653996	0.0790219	0.0486258	0.0396994	1.14585	1.22485	1.06894
Ikbkb.1	TCCCTCCCAACCCAGACATG	0.709528	0.791586	0.695558	0.634625	0.670815	0.699214	1.02047	0.943257	0.817164	0.853653	0.896337	0.957255	1.06796
Ifnar1.4	GCTCGCTGTCGTGGGCGCGG	0.739141	0.865111	0.767428	0.821155	0.799959	0.766787	1.29774	1.01946	0.898854	0.986982	0.854388	0.91071	1.06592
Klf6.4	TCGCTGTCGGGAAAACAGGG	0.767076	0.804863	0.700455	0.684174	0.829538	0.820708	-	-	-	-	0.953052	1.01076	1.06055
Cd79a.2	TTACTTCGGGGAAGAACAGC	0.357739	0.405119	0.303262	0.320758	0.407243	0.434913	-	-	-	-	0.883047	0.936379	1.0604
Tcf3.4	ATCAGTAGCCGACGCCGAAG	0.485574	0.440321	0.62491	0.541718	0.52936	0.452705	-	-	-	-	1.10277	1.16933	1.06035
Tnfrsf13b.4	GTACTACGACCATCTCCTGG	0.347502	0.555742	0.496986	0.328432	0.348936	0.526997	-	-	-	-	0.625293	0.66212	1.0589
Bcl10.1	CAGCCACTCTTCCTCGACCT	0.515535	0.518319	0.469935	0.470311	0.548626	0.521314	-	-	-	-	0.994629	1.05239	1.05807
Vav1.1	TTTTGACCTCTTCGATGTGC	0.263536	0.279839	0.294085	0.329924	0.261482	0.262653	-	-	-	-	0.941742	0.995541	1.05713
Ikbkb.3	GCTTCACGGTAACCGCCTGA	0.589567	0.666544	0.619154	0.470209	0.518789	0.635268	0.777451	0.805761	0.62525	0.669717	0.884512	0.933603	1.0555
Traf3.2	GGCCCATGAGGCCAGCTCCG	0.457387	0.433717	0.505726	0.384541	0.465815	0.418551	-	-	-	-	1.05457	1.11292	1.05533
Traf3.3	AAAGGCCTGTAAATACCGCG	0.493564	0.651105	0.573617	0.746801	0.565839	0.707458	-	-	-	-	0.75804	0.79982	1.05511
Ticam1.1	TCCAGACTTGTCCTGGACGG	0.554529	0.544938	0.473744	0.468759	0.485896	0.452705	-	-	-	-	1.0176	1.07332	1.05475
Igbp1.1	GTGAGGGCTCCTTGCAACGC	0.344157	0.527177	0.371162	0.419221	0.404624	0.588207	-	-	-	-	0.652829	0.687895	1.05371
Vav2.4	CCTTAAGGTCGATGGAACCG	0.505765	0.526354	0.564143	0.374072	0.438238	0.433007	-	-	-	-	0.960884	1.01208	1.05328
Cd200.3	CGTCACCGAAATCAGGAGCG	0.170964	0.211177	0.184504	0.142933	0.0958492	0.164875	0.20251	0.135252	0.0925847	0.108611	0.809575	0.852441	1.05295
Il3ra.3	ATGAGCAGCGGGCAAGCCCG	0.859787	0.6063	0.696318	0.68214	0.840159	0.910707	0.941333	0.522022	0.80253	0.538597	1.41809	1.49004	1.05074
Hdac9.3	CGATTCAGGGGTCGGTGGCG	0.675499	0.714982	0.619863	0.551103	0.685867	0.691305	-	-	-	-	0.944778	0.992133	1.05012
Tcf3.3	GCGGGTCCGCGACATCAATG	0.640039	0.59718	0.576939	0.531924	0.527017	0.469542	-	-	-	-	1.07177	1.12241	1.04725
Traf3.4	CCAGCAGATCAAGGCCCATG	0.426278	0.530596	0.51617	0.622322	0.409331	0.487341	-	-	-	-	0.803394	0.839929	1.04548
Rpa2.3	GTCGCCCACACCGTCGCAGG	0.539129	0.553139	0.472812	0.536139	0.64189	0.612391	0.496166	0.629449	0.544949	0.536359	0.974671	1.01602	1.04242
Leprot.2	GATGTGCGTTGGAGGACTAT	0.366835	0.313309	0.423967	0.441885	0.294789	0.406272	0.312448	0.447722	0.334199	0.274074	1.17084	1.21937	1.04145
Tnfrsf13c.2	CCGACGAGCAGCGCCACGTC	0.992891	0.848149	0.815986	1.00557	1.14306	0.941338	-	-	-	-	1.17066	1.2143	1.03728
Auh.2	GGGCTAGGGGTACCGCCCCG	0.373436	0.331895	0.36664	0.302365	0.361131	0.325832	0.34737	0.502164	0.303139	0.259929	1.12516	1.16624	1.03651
Ap3b1.1	GATGCTATGAAGCGAATTGT	0.437385	0.502955	0.487216	0.410116	0.442783	0.468189	0.856624	0.757099	0.599506	0.665625	0.869631	0.900667	1.03569
Smad3.3	GCGGCTCTACTACATCGGAG	0.170263	0.165045	0.231046	0.223966	0.135562	0.207534	0.328806	0.144849	0.175216	0.164059	1.03162	1.06801	1.03527
B2m.3	GGTCTTGGGCTCGGCCATAC	0.824045	0.95345	0.780825	0.789755	0.712704	0.885895	1.04916	1.0036	0.882712	0.9871	0.864277	0.894248	1.03468
Apoe.4	GTACAAGGCAGGGGCACGCG	1.04322	1.20795	1.03775	1.1407	1.06943	1.0816	1.67173	1.5692	1.11422	1.25036	0.863627	0.891118	1.03183
Psmb9.2	ATGGCAGTGGAGTTTGACGG	0.293323	0.306527	0.287959	0.283497	0.318464	0.3356	0.180553	0.301354	0.128744	0.130486	0.956923	0.986654	1.03107
Ebi3.2	TGGGGGCTCCGTTGTAGGCA	0.658691	0.724302	0.652052	0.695059	0.64062	0.667028	0.953202	0.884637	0.831547	0.889891	0.909415	0.934437	1.02751
Cblb.2	GAGCTGGTCATAGTCCTGCG	0.289816	0.268998	0.258421	0.215128	0.205112	0.337944	0.233399	0.247904	0.214281	0.193627	1.07739	1.10667	1.02717
Map4k2.2	GTTCGGACGTGACGGTGTCA	0.742237	0.617462	0.445963	0.340147	0.536054	0.523717	0.646904	0.504822	0.388777	0.315178	1.20208	1.23352	1.02615
Lat2.1	ATGAGAAAATCTACGAGCAG	0.181966	0.144278	0.161293	0.116044	0.122743	0.0951683	-	-	-	-	1.26122	1.28975	1.02262
Mgat5.3	TCCGGCGAATGGCTGACGCG	0.970648	1.09214	1.18436	0.976436	1.0613	0.930295	1.58762	1.46104	1.09075	1.20168	0.888759	0.907685	1.0213
Atg5.4	GATGAAAGGCCGCTCCGTCG	0.662572	0.546017	0.724863	0.723006	0.730824	0.748303	0.772714	0.765472	0.802111	0.64842	1.21346	1.23702	1.01941
Tcf3.1	AAACTGGGTTCCCCCGAGGG	0.700258	0.904489	0.563655	0.620025	0.544921	0.693478	-	-	-	-	0.774202	0.78578	1.01495
Socs4.2	AGTAACAATCCGTGCTACTG	0.158887	0.148968	0.133535	0.0865477	0.126369	0.117731	0.137224	0.158984	0.0851638	0.0788279	1.06658	1.08038	1.01293
Aip.4	GAGGACAAAGCTCGCTTCCG	0.46394	0.501442	0.34678	0.383869	0.468982	0.501291	-	-	-	-	0.925211	0.935549	1.01117
Tmbim1.1	AGGCGGGATAACCACCTGGC	0.19292	0.21623	0.170058	0.196405	0.296095	0.156268	0.276517	0.102598	0.192595	0.214401	0.892197	0.898292	1.00683
Tnf.3	AGAAAGCATGATCCGCGACG	0.81022	0.806889	0.821962	0.773075	0.808327	0.887798	1.10647	1.06441	0.881168	0.872532	1.00413	1.0099	1.00574
Stat5a.3	ATCAAGCGCGCCGACAGGCG	0.554529	0.604863	0.434146	0.633084	0.519099	0.563244	-	-	-	-	0.916785	0.921624	1.00528
Itgb2.3	GTGACTTTCCGGCGGGCCAA	1.13026	1.04812	1.14512	1.07283	1.1478	0.994905	1.87487	1.58227	1.38664	1.27998	1.07837	1.08333	1.00459
Eno3.1	CCATGCAAAAAATCTTCGCC	0.186326	0.182773	0.13872	0.160058	0.103789	0.21154	0.131759	0.184459	0.13184	0.128838	1.01944	1.0233	1.00379
Cd86.3	AACTGTCAGTGATCGGTATG	0.290472	0.178918	0.30415	0.207699	0.241782	0.148522	-	-	-	-	1.62349	1.62793	1.00273
Aicda.4	TTCACAGAAGTAGAGGCGCG	0.436602	0.416013	0.583447	0.578929	0.546152	0.521128	-	-	-	-	1.04949	1.04802	0.998595
Tgif1.4	TGAAATCTTGGCCCCACGGC	0.489765	0.626779	0.434213	0.641643	0.495051	0.418757	0.406702	0.477887	0.36337	0.466049	0.7814	0.779682	0.997802
Tubb2a.3	AGCCCACCTTAGCGCCGATC	0.136843	0.234392	0.152952	0.149572	0.081535	0.128873	0.15072	0.122308	0.0881514	0.151325	0.583821	0.582532	0.997791
Il3ra.4	TGTCGTGATGTCAGCGCCGG	0.44554	0.575062	0.423463	0.626471	0.302221	0.539893	0.415636	0.625154	0.467661	0.604993	0.774768	0.773002	0.997721
Cd274.4	GTATGGCAGCAACGTCACGA	0.795908	0.941565	0.880624	0.914409	0.892388	0.826419	1.44901	1.10402	0.774288	0.918742	0.845303	0.84277	0.997004
Nlrc4.2	TGGTCCTTCTTCCACATGAT	0.0462737	0.0774897	0.0752205	0.141208	0.0820627	0.1874	0.102321	0.0891141	0.0600568	0.101027	0.59716	0.594461	0.995481
Vav1.4	GAAGCTGTGCAAGTTCACCG	0.486005	0.478866	0.434146	0.394171	0.586286	0.580808	-	-	-	-	1.01491	1.00943	0.994605
Gdi1.2	ATATAAGCGCTTTCAGATAC	0.124572	0.127548	0.148643	0.16259	0.110805	0.181985	0.244971	0.125707	0.153744	0.158272	0.976668	0.971394	0.994599
Stat6.3	TTTAGCGACTCTGAGATCGG	0.526422	0.567518	0.490013	0.472687	0.409095	0.443807	-	-	-	-	0.927588	0.921787	0.993746
Itgb2.2	TTGTCCAGCCGATGATATCA	0.469724	0.547235	0.504517	0.440598	0.402298	0.419019	0.616795	0.622866	0.556182	0.652575	0.858359	0.852288	0.992928
Malt1.4	GAGCTTGGACCGCGCTCCGG	0.654859	0.674983	0.715462	0.948097	0.628391	0.654238	-	-	-	-	0.970187	0.960493	0.990009
Blnk.4	GTCTGTGACTAGACCCTCGG	0.413398	0.331358	0.407649	0.441579	0.392426	0.318001	-	-	-	-	1.24759	1.23404	0.98914
Hdac7.2	GTGCCCCGCCCAGCCTTCGG	0.567468	0.88778	0.614142	0.829206	0.526399	0.835139	-	-	-	-	0.639199	0.630314	0.986099
Bub1.1	TACCCGTGTAGCTTTGCATA	0.0741116	0.0983196	0.0771231	0.12244	0.179534	0.0886356	0.0586797	0.0580625	0.112196	0.151627	0.753783	0.739944	0.981641
Bcr.2	GTGGGTTTTGTCCGGAATCC	0.491594	0.545293	0.314729	0.455375	0.355853	0.402195	-	-	-	-	0.901523	0.884777	0.981425
Ap3d1.1	GCTTGATCTCGTCAATGCAC	0.288091	0.307421	0.346635	0.289448	0.259612	0.238293	0.356965	0.404582	0.345041	0.375333	0.937123	0.919295	0.980976
Map3k5.3	GCTGAACGAAACGGTCCACG	0.239223	0.233215	0.324456	0.323465	0.310371	0.283992	0.47991	0.24365	0.294801	0.293087	1.02576	1.00585	0.980589
Itgb2.1	GACTGTATCCAGTCGGGGCC	0.902711	0.96082	0.938846	1.08914	1.06855	1.06386	1.52125	1.4317	1.09073	1.18421	0.939522	0.921057	0.980347
Blnk.3	GCTGGCCTTCAGCGAAAGCG	0.248439	0.255555	0.253874	0.298563	0.293112	0.308768	-	-	-	-	0.972155	0.949295	0.976486
Ctrl40.3	GTGACGACGACAATGTGGGC	0.676007	0.604501	0.535696	0.543503	0.654424	0.556148	0.51353	0.329397	0.505493	0.463049	1.11829	1.09166	0.97619
Tnfrsf13c.4	GCTGCATGAGGCGGCGACAT	0.671733	0.572681	0.705718	0.494073	0.599338	0.524206	-	-	-	-	1.17296	1.14333	0.974734
Atp5c1.2	TGGCTTACCAGCAGTCGCAA	0.24967	0.268294	0.355789	0.206335	0.203986	0.16074	0.317165	0.362969	0.173351	0.191128	0.930583	0.90699	0.974647
Il9r.3	TTTACAGGATCGACTGCCAC	0.0593112	0.102447	0.210721	0.11156	0.0841442	0.0775299	0.149916	0.0744471	0.0279857	0.0496151	0.578948	0.564056	0.974277
Cmtm4.3	CCCAAGTGGTAGGTGCCGGG	0.196318	0.232882	0.211101	0.193887	0.275466	0.278814	0.178942	0.214611	0.206278	0.251212	0.842993	0.821128	0.974063
Prkcb.2	AGGTAGGACTGGAGTACGTG	0.168494	0.241238	0.0867737	0.150583	0.138973	0.224041	0.0308003	0.208636	0.139705	0.205602	0.698457	0.679495	0.972851
Ada.2	CGCCCTCCCGGCAGATACAG	0.48082	0.555997	0.667468	0.592768	0.54986	0.65392	-	-	-	-	0.864787	0.840868	0.972341
Icam1.2	ATGGATACCTGAGCATCACC	0.574854	0.494238	0.514436	0.54112	0.595497	0.592043	0.822032	0.76746	0.755206	0.668299	1.16311	1.13004	0.971567
Cd47.4	TTATACCAGCTTCCAACCAG	0.3617	0.379167	0.375586	0.383792	0.462484	0.429509	0.625912	0.536312	0.456262	0.492749	0.953934	0.925951	0.970666
Ada.1	GGTAGAGTTACACGTCCACC	0.312739	0.338626	0.291922	0.403258	0.293026	0.327151	-	-	-	-	0.923552	0.895689	0.969831
Hdac7.3	GCCCAAGAGCGCCTGCCATG	0.607261	0.509885	0.69414	0.653282	0.559176	0.484196	-	-	-	-	1.19098	1.15485	0.969671
Aip.3	ATAGATGACAGCCGAACACG	0.369245	0.4823	0.397832	0.473896	0.360093	0.485102	-	-	-	-	0.765592	0.742305	0.969583
Stat5a.2	GGACGATAACGACCACAGGG	0.420458	0.385666	0.401913	0.492684	0.413266	0.392635	-	-	-	-	1.09021	1.05254	0.96545
Cd74.4	ACCGCCCTAGAGAGCCAGAA	0.447955	0.499262	0.538974	0.469954	0.491124	0.45327	0.549298	0.649462	0.47527	0.551015	0.897233	0.862535	0.961328
Ikbkb.2	GTGCCCTCTCTGTAGGCGAC	0.75545	0.739361	0.690313	0.650873	0.753428	0.663346	1.14972	1.04326	0.844705	0.862165	1.02176	0.979748	0.958883
Cd40.3	TCTTGCCGTCGAGCCGCAGG	0.857493	0.708119	0.778163	0.789576	0.868418	0.749646	-	-	-	-	1.21095	1.15844	0.956638
Mbp.4	GACTATAAATCGGCTCACAA	0.460939	0.499569	0.489372	0.478145	0.520958	0.480671	0.652977	0.718035	0.520621	0.591525	0.922674	0.880132	0.953894
Eif2ak2.2	TTGTTCGTTGGTAACTACAT	0.103637	0.0591289	0.1024	0.142614	0.0296862	0.0956907	0.0664563	0.10689	0.105849	0.0633499	1.75273	1.67087	0.953293
Cd86.4	ACTATCCCGCTCTAACTTAG	0.0885704	0.0286578	0.0967869	0.0524809	0.139474	0.0473772	-	-	-	-	3.09062	2.94391	0.952532
Dnase1.2	CAGCGATGTCATAGCGACTC	0.509357	0.46002	0.518649	0.534828	0.644681	0.611749	-	-	-	-	1.10725	1.05383	0.951757
Pml.4	GGTATGCGTTCCCGGATGAG	0.120224	0.164971	0.137261	0.079617	0.0819233	0.129046	0.180079	0.121746	0.09827	0.141749	0.728758	0.693268	0.951301
Ldlr.4	GACATCCGCCGTCCGGCCTG	1.32785	1.46327	1.2096	1.46632	1.31231	1.35816	1.86474	1.8687	1.43338	1.66124	0.907453	0.862834	0.95083
Hipk2.1	GTTCCAACTGGGACATGACT	0.149109	0.255343	0.121529	0.191506	0.147655	0.16518	0.0952309	0.119119	0.087925	0.158444	0.583955	0.55493	0.950295
Il9r.4	TCCTCTTTACCAGGTGAGGG	0.217037	0.141925	0.152105	0.19649	0.28725	0.110833	0.217884	0.109955	0.222759	0.153402	1.52924	1.45213	0.949577
Il16.1	AGCGAAATTTCGTGGATTTC	0.272222	0.0596393	0.137642	0.0397503	0.0994538	0.0793649	0.0628196	0.0704095	0.162732	0.0375589	4.56448	4.3327	0.949221
Tox.1	AGGTCCCAGACAAGGAGCGG	0.128021	0.168148	0.117882	0.207395	0.130812	0.13787	0.114678	0.239521	0.122802	0.170061	0.76136	0.722106	0.948443
Ttc3.3	CCTTGGAATAGGACGACCAG	0.121913	0.0935635	0.0551184	0.0956892	0.0762458	0.101739	0.132005	0.0660067	0.0411033	0.0332751	1.303	1.23525	0.948008
Bst2.2	CACTTTGAGCACCAGTAGGC	0.300985	0.298105	0.294659	0.45045	0.519791	0.544098	-	-	-	-	1.00966	0.955325	0.946185
Ddit4.4	TCGGCATGAGCAAACGCGCA	0.149481	0.08851	0.139456	0.113592	0.102773	0.136046	0.159172	0.123304	0.182547	0.114497	1.68886	1.59433	0.944027
Cdkn1b.4	CAATTAAAGGCACCGCCTGG	0.14021	0.160309	0.126746	0.168039	0.164485	0.08865	0.122239	0.141921	0.0670548	0.0813171	0.874621	0.82461	0.94282
Nrp.4	ATGGCAGCCTCCGCCATAAA	0.0735635	0.106647	0.0765715	0.0750342	0.0585662	0.0356272	0.0815097	0.113071	0.0312878	0.0481369	0.689788	0.649976	0.942284
Ddost.2	TTTTGGAGGCAACATCAACG	0.376627	0.427288	0.348837	0.399295	0.40034	0.323649	0.555866	0.539304	0.420237	0.505996	0.881437	0.830516	0.94223
Ddit4.2	AGCCCAATCGCGCCTGGGAC	0.324066	0.424032	0.305722	0.414513	0.503071	0.30483	0.182102	0.347526	0.305011	0.423618	0.764249	0.720014	0.94212
Rabgap1l.3	CTTAATGAAGAAACGCCCAA	0.122071	0.162654	0.078657	0.119538	0.202798	0.195879	0.0783073	0.103343	0.0660238	0.0936139	0.750498	0.705278	0.939746
Ap3d1.3	TCTCCCCACGGAGAGCGATG	0.775529	0.778673	0.652163	0.81178	0.72762	0.619388	1.04885	1.07699	0.874802	0.935015	0.995962	0.935602	0.939396
Cd19.4	TGATTCAAACTGCTCCCCCG	0.488931	0.482711	0.505724	0.497083	0.482565	0.507278	-	-	-	-	1.01289	0.951282	0.93918
Plp1.4	GTCCTTAAACTCATGGGCCG	0.4534	0.518124	0.482952	0.54136	0.550231	0.613628	0.892296	0.810384	0.630467	0.76749	0.875079	0.821466	0.938734
Bst2.3	GCTGGGGGCCGCGATCTTGG	0.650337	0.351145	0.482111	0.57249	0.677285	0.389806	-	-	-	-	1.85205	1.73749	0.938148
Pag1.4	GCTTAACCGGGACAGGAGGT	0.481614	0.529353	0.492287	0.469567	0.584101	0.475534	0.833482	0.655573	0.548118	0.642266	0.909817	0.853412	0.938004
Tpd52.1	AATCGGGGGAACATACGCAT	0.508474	0.538294	0.436326	0.380264	0.392426	0.444658	-	-	-	-	0.944603	0.882534	0.934291
Bank1.3	AACGTGCTGGCCGTGCTCTG	0.636961	0.749917	0.579714	0.777689	0.484513	0.610756	-	-	-	-	0.849375	0.7933	0.933981
Ebi3.4	GCAGGCGCACGCCTTCCGGA	1.06811	0.908412	1.05194	0.876003	1.02628	0.87705	1.40894	1.06611	1.08809	0.992207	1.1758	1.09663	0.932666
Mgat5.4	TCTCAAGCGACACCAAGCTG	0.579134	0.544106	0.564398	0.670851	0.620046	0.531338	0.793061	0.829938	0.583213	0.588472	1.06438	0.991063	0.93112
Sphk2.3	CTGACAGAGGCACTCCTCGG	0.723667	0.709428	0.81023	0.680873	0.732521	0.583058	1.01646	0.864182	0.727059	0.765751	1.02007	0.949472	0.93079
Hmgb3.2	AGACCTCCGTAAGTGCCTAT	0.112821	0.183091	0.119725	0.22318	0.09867	0.172521	-	-	-	-	0.616201	0.571931	0.928157
Stat6.1	AGGAGATGCCGTAGGCGTTG	0.579863	0.544938	0.664667	0.655613	0.515033	0.521616	-	-	-	-	1.06409	0.987379	0.927909
Cd48.4	GACCATATAAACGTATCACC	0.519021	0.474519	0.545292	0.588118	0.591941	0.515326	0.678984	0.735015	0.606811	0.598682	1.09378	1.01358	0.926672
Bcr.3	GTACTCCAGGGGCGGCCAAG	0.705645	0.583994	0.546858	0.524314	0.683037	0.611076	-	-	-	-	1.20831	1.11776	0.925062
Ctrl1.3	TGTCCACCATTTTGGCAACC	0.45922	0.467066	0.329412	0.352686	0.506643	0.557291	-	-	-	-	0.9832	0.909118	0.924652
Ldlr.1	AAAATGCATCGCTAGCAAGT	0.571132	0.539888	0.497774	0.598442	0.491855	0.480769	0.875754	0.772641	0.708101	0.724933	1.05787	0.976781	0.923346
Sema7a.3	CTGGGGGCGGCACGTCCGGG	0.489765	0.515085	0.478332	0.6258	0.798704	0.56755	0.441502	0.521706	0.41661	0.474531	0.950843	0.877941	0.923328
Btla.1	TAACCGAGGAGTCCCAAGCA	0.584704	0.571645	0.678405	0.654347	0.608584	0.58421	0.845824	0.659904	0.700494	0.742482	1.02285	0.943448	0.922376
Hmgb3.3	GGCACTTACGGAGGTCTTTT	0.559478	0.479747	0.457656	0.53282	0.535008	0.497401	-	-	-	-	1.1662	1.07561	0.922321
Ifngr2.1	CTTACAAGCTATATTCCACC	0.259472	0.0835172	0.278161	0.120743	0.230902	0.128592	0.179556	0.12633	0.308686	0.107831	3.10681	2.86268	0.921421
Ly6e.2	CATGCAGGGAATGTCAACCT	0.0866722	0.0710685	0.100482	0.112284	0.13263	0.110519	0.131059	0.0838861	0.0983379	0.08753	1.21956	1.12348	0.921215
Hdac9.2	GCGACAGCAAAAGCTTCTCG	0.360231	0.435768	0.346788	0.401655	0.312217	0.410136	-	-	-	-	0.826656	0.761253	0.920882
Ets1.3	GAGAGTCGGCTTGAGATCGA	0.376034	0.477266	0.225759	0.455869	0.253265	0.308859	0.201695	0.484913	0.235027	0.323933	0.787893	0.725542	0.920864
Hmgb3.1	GCACTTACGGAGGTCTTTTG	0.559079	0.479747	0.457149	0.50596	0.532933	0.496729	-	-	-	-	1.16536	1.07289	0.920645
Ifnar2.4	CCAACGATCTCAAATTCTGG	0.0525622	0.1312	0.164208	0.263424	0.121883	0.168912	0.117981	0.195028	0.0480887	0.130522	0.400626	0.368433	0.919645
Ddit4.1	AGTTCGAGACGAGGACGAAG	0.202107	0.173786	0.151709	0.153126	0.109825	0.219852	0.0858234	0.255067	0.0738881	0.0690988	1.16296	1.06931	0.919471
Rpa2.1	GTAGCCGCCTGCTCCGCCAT	0.177461	0.184889	0.171396	0.20681	0.16133	0.22123	0.133818	0.209312	0.111694	0.126611	0.959825	0.882182	0.919107
Ctrl65.3	CCTGAACACCTCCTCGAATA	0.396239	0.417464	0.372352	0.360369	0.334011	0.442411	0.529247	0.566025	0.432716	0.49632	0.949159	0.871849	0.918549
Ddost.3	AGGCCACACCCGGTGCGCAG	0.896603	0.935342	0.762417	0.869869	0.875893	0.873838	1.63202	1.16413	0.969314	1.10108	0.958583	0.880327	0.918363
Il21r.2	GTCAATGTGACGGACCAGTC	0.201516	0.370099	0.0921581	0.19161	0.225176	0.302077	0.112373	0.132705	0.186144	0.373058	0.544494	0.498968	0.916389
Nusap1.2	CAAGCTGAGACGGAATCAGG	0.181647	0.183619	0.0887958	0.13773	0.1521	0.136505	0.0765661	0.128929	0.142703	0.157616	0.989256	0.905384	0.915217
Il16.2	ACTCAGCGCCCCCACATCGA	0.549049	0.412539	0.765497	0.503144	0.438811	0.308692	0.457984	0.323316	0.374489	0.307481	1.3309	1.21793	0.915113
Atg5.3	CCCTATAGACCACGACGGAG	0.24592	0.0707118	0.251769	0.144697	0.227056	0.1605	0.213954	0.115401	0.337477	0.106117	3.47778	3.18023	0.914442
Rcn1.3	AAGCCAAGCTACCAACTACG	0.22589	0.170516	0.234566	0.185113	0.203884	0.206311	0.237939	0.170476	0.222387	0.183626	1.32474	1.21109	0.914207
Tnfrsf13b.2	ATCAATTGCCGAAAAGAGCA	0.212673	0.205172	0.135207	0.207521	0.184306	0.194894	-	-	-	-	1.03656	0.945674	0.91232
Cr2.4	TTTTCACACACTGGTACCGG	0.414466	0.358353	0.426252	0.484568	0.397564	0.377246	-	-	-	-	1.15659	1.05386	0.91118
Stat5a.4	GGTAGTGCCGGACCTCGATG	0.405758	0.325846	0.437831	0.32879	0.342257	0.301656	-	-	-	-	1.24524	1.13459	0.911143
Leprot.3	GAAATACGCCAGTTCCCGAC	0.382393	0.321257	0.366332	0.192904	0.231309	0.178696	0.294088	0.0973294	0.274337	0.253456	1.19031	1.08239	0.909334
Blnk.1	TCCCTTCGAGGAACACTTGG	0.345444	0.396662	0.343112	0.321401	0.337478	0.426247	-	-	-	-	0.870876	0.791742	0.909133
Dnase1.1	TCTCACAGGATGCGGTACAC	0.557409	0.4046	0.596347	0.626353	0.585669	0.468038	-	-	-	-	1.37768	1.25133	0.908286
Casp3.4	GAAATTCAAAGGACGGGTCG	0.0993848	0.238774	0.140275	0.258464	0.110805	0.246679	0.191916	0.230947	0.125106	0.331118	0.41623	0.377829	0.907741
Ddost.4	TCCAGCAGCACGAGGGTGCG	1.25456	1.23842	1.23467	1.24505	1.11749	1.05345	1.98964	1.59658	1.3494	1.46899	1.01303	0.918589	0.906771
Cd22.2	GCATCCCTAAAGTCTCCCCG	0.416532	0.518319	0.312571	0.401124	0.319192	0.438031	-	-	-	-	0.803621	0.728697	0.906766
Cd180.4	GCCCACAGCTGCCATACTAC	0.27431	0.271351	0.457939	0.315789	0.273576	0.298769	-	-	-	-	1.0109	0.915676	0.905799
Aicda.3	AAAAATGTCCGCTGGGCCAA	1.04062	1.09544	0.900976	0.881403	0.905771	1.05277	-	-	-	-	0.949952	0.860365	0.905693
Cnr2.2	GTGACCAACGGCTCCAACGG	0.60355	0.51851	0.588408	0.521012	0.556948	0.669172	0.610759	0.408334	0.322022	0.305461	1.16401	1.05422	0.905679
Cd180.3	GAAGGCGTGCTGGTCAATGG	0.543487	0.578742	0.735541	0.685462	0.61594	0.724402	-	-	-	-	0.939085	0.850273	0.905427
Rhoh.3	GGTGAAGCGCACCAACAGTG	0.41426	0.488565	0.435611	0.463785	0.424875	0.501111	0.690313	0.575733	0.544163	0.709344	0.847911	0.767135	0.904735
Cxcr4.1	ACGTTTTCATCCCGGAAGCA	0.321303	0.310166	0.273262	0.412969	0.400622	0.318958	0.565429	0.495116	0.426723	0.455312	1.03591	0.937211	0.904725
Il4ra.2	CAGCAGCAATGGCATCCGCG	0.185415	0.172634	0.198231	0.297174	0.203411	0.172282	0.228643	0.206935	0.167609	0.17267	1.07403	0.970689	0.903779
Trim26.3	GAACATTGAACGGCTGAAGG	0.172068	0.246047	0.186548	0.238046	0.236672	0.196348	0.27606	0.337784	0.174847	0.276711	0.699329	0.631875	0.903545
Il22ra1.1	TGTTCTCAAAGTTGCTGGAC	0.179252	0.157593	0.259079	0.283186	0.223505	0.158563	0.268067	0.151932	0.168024	0.163544	1.13744	1.02739	0.903253
Traf6.3	GCCACGAAGTACTGATGCGG	0.414741	0.348406	0.556322	0.348466	0.451023	0.328183	0.359265	0.301507	0.220158	0.20476	1.1904	1.0752	0.903232
Ddb2.3	GAGGAGCACCGCAACGTCGG	0.255751	0.222931	0.285408	0.182319	0.296994	0.218821	0.247959	0.117408	0.147406	0.142881	1.14722	1.03167	0.899276
Irak4.3	GGAGCTGATAACCGGGCTGG	0.25435	0.283923	0.204117	0.325988	0.197781	0.247115	0.291537	0.211607	0.106913	0.132759	0.895842	0.805315	0.898948
Swap70.3	GCAGCGCGGCCGCGGCCATG	0.42906	0.553541	0.440988	0.664432	0.428159	0.61622	-	-	-	-	0.775118	0.694816	0.8964
Itga3.1	CGGACCACATCGTGCTGCTG	0.643478	0.648688	0.598777	0.797842	0.590342	0.632475	0.990228	0.877917	0.622138	0.699667	0.991969	0.889191	0.89639
Socs5.1	TGACAGACGGACATCTGTTG	0.260307	0.411197	0.281792	0.311452	0.072374	0.239008	0.263925	0.274189	0.128299	0.226243	0.633048	0.567085	0.895801
Tnfsf9.2	TCTGAGGAGCGCCGCATCCG	0.933718	0.9485	1.01917	0.95963	1.03636	1.21865	1.59716	1.47984	1.15234	1.30772	0.984415	0.881184	0.895134
Map3k5.2	CCCAGCAGGAGCTCGAAGTT	0.220957	0.128081	0.148299	0.0982777	0.12865	0.0841695	0.179402	0.122325	0.12891	0.0835861	1.72513	1.54225	0.893988
Hdac5.3	CAGTTGAGATCACCGGCACG	0.925805	0.644766	0.763805	0.802338	1.02278	0.79707	-	-	-	-	1.43588	1.28318	0.893653
Cd48.1	CCGGTGGTGGCATTTATATC	0.278457	0.28509	0.318478	0.226431	0.270014	0.23273	0.420399	0.365887	0.313022	0.359473	0.976733	0.870779	0.891522
Ebi3.1	CCACGGGATACCGAGAAGCA	0.515577	0.440875	0.618262	0.423096	0.526758	0.433809	0.681364	0.548632	0.556905	0.534539	1.16944	1.04184	0.89089
Tnfrsf1b.3	GGACCGAAGGGCGCCCCCTG	1.1037	1.0788	1.1387	1.18957	1.05144	1.14585	1.64101	1.62439	1.31973	1.44894	1.02308	0.910821	0.890278
Bcl6.3	TCACGGGGAGGTTTAAGTGC	0.352245	0.335184	0.533709	0.278101	0.312217	0.334535	-	-	-	-	1.0509	0.933288	0.888085
Tnfrsf1b.2	GTCCGCACACACGGTGTCCG	1.44529	1.42588	1.44319	1.38418	1.38953	1.41993	1.99766	1.83451	1.55294	1.73978	1.01361	0.892603	0.880616
Ccnd3.2	TGCTGGAGGTAAGGCCCGAA	0.80839	0.733266	0.733251	0.717388	0.744376	0.771582	1.0615	1.08643	0.924614	0.953492	1.10245	0.969713	0.879598
Ttc39b.3	GGCGCTCGTGGGCAGCCGAG	0.601598	0.512657	0.507193	0.628295	0.610611	0.522391	0.460786	0.522833	0.48418	0.469306	1.17349	1.03169	0.879166
Tpd52.4	TGGACCGCGGCGAGCAAGGT	0.427625	0.447831	0.447304	0.481786	0.575178	0.685784	-	-	-	-	0.954881	0.838716	0.878347
Tnfrsf10b.3	GAACCAGGAGTCCTATCCAG	0.225577	0.166505	0.300202	0.316406	0.237418	0.25942	0.191801	0.155201	0.166387	0.140219	1.35478	1.18663	0.875885
Itch.3	TTTTAGCTGGGAACGGCGTG	0.85253	0.910669	0.786084	0.773627	0.813945	0.826956	1.20421	0.987259	0.864641	1.05453	0.936157	0.819928	0.875844
Tnfrsf14.1	CAGGGTGCCGACCCCCATCC	0.32266	0.462442	0.341762	0.511554	0.399628	0.402984	0.388681	0.320816	0.297317	0.487429	0.697731	0.60997	0.87422
Syk.1	AATTGCGGCTCTGGCGTAGC	0.632854	0.610776	0.638043	0.557475	0.685696	0.757037	-	-	-	-	1.03615	0.905763	0.874164
Tgfbr1.1	ATGGCCTGTCTCGAGGAATT	0.239274	0.266334	0.156317	0.112077	0.0684026	0.188912	0.160905	0.161353	0.112861	0.143826	0.898397	0.784705	0.87345
Tlr4.3	ACACGTCCATCGGTTGATCT	0.421657	0.387698	0.269423	0.309468	0.409095	0.431545	-	-	-	-	1.08759	0.947979	0.871632
Atp7a.2	CCAAGAAGCTATCGATGACA	0.384883	0.381857	0.391631	0.384248	0.391691	0.321058	0.631687	0.484151	0.420363	0.479822	1.00793	0.876081	0.869192
Fadd.2	AGCCCGGCGTACCACTGCCA	0.569239	0.534611	0.560912	0.593738	0.668573	0.652682	0.564898	0.459096	0.466654	0.505229	1.06477	0.92365	0.867463
Igbp1.4	TACGGAGTATTACCCGACCG	0.489149	0.349284	0.470955	0.380611	0.506026	0.417124	-	-	-	-	1.40043	1.21313	0.866253
Cap1.3	GAACTGAGTGGATTGCCATC	0.264264	0.277419	0.184048	0.271157	0.312761	0.212766	0.316999	0.157542	0.222356	0.269752	0.95258	0.824299	0.865334
Ptprc.4	GGCTAATACTTCAATTTGTT	0.120845	0.0986269	0.154063	0.136683	0.137503	0.129921	-	-	-	-	1.22528	1.05836	0.863769
Cdkn1b.1	CTCCACAGTGCCAGCGTTCG	0.0854559	0.157285	0.101946	0.105933	0.0755353	0.117758	0.0337694	0.180479	0.0431043	0.0918504	0.543319	0.469288	0.863742
Cd81.4	TTGGTACTCACCCACGTAGA	0.316992	0.255442	0.509167	0.273177	0.35278	0.331	-	-	-	-	1.24095	1.0658	0.858859
Mif.1	GCAAACCTGTGCGGGCTTGC	1.01446	0.888605	0.919441	0.940884	0.901919	0.975276	1.53183	1.2535	0.958738	0.979384	1.14163	0.978919	0.857473
Rabgap1l.2	AGGCGGCTTAGTTGTTTGGC	0.0739446	0.101401	0.0641382	0.122824	0.0957762	0.0692628	0.0659596	0.0999084	0.0470473	0.0753549	0.729231	0.624343	0.856166
Bdh1.2	TGGTGCGCACGGTTCCCCAG	0.421323	0.533022	0.413609	0.454154	0.303341	0.691464	0.329854	0.49248	0.3032	0.448663	0.790443	0.675786	0.854946
Il10rb.3	GAACACCTCGGCCTCCTCGG	1.20848	1.35813	1.34944	0.818094	1.21119	0.991871	1.15074	1.02879	0.692943	0.911133	0.889814	0.760529	0.854705
Ctrl40.4	CAATGTGGGCGAGGGATTCA	0.112601	0.177429	0.112325	0.150236	0.134921	0.132164	0.0991331	0.163299	0.0647515	0.119441	0.634625	0.54212	0.854236
Icam1.4	GGACCTCACCGAAAGTCCGG	0.979811	0.996041	1.08778	0.971471	1.0297	1.03019	1.76898	1.2846	1.10382	1.31533	0.983705	0.839201	0.853102
Itgal.3	TGCTTGTTCGGCAGTGATAG	0.600452	0.50796	0.586728	0.624007	0.612249	0.662655	0.908702	0.816107	0.783813	0.779214	1.18209	1.0059	0.850956
Klf6.3	TGGAGGTGTGGAAATGACGG	0.490378	0.48911	0.439811	0.47119	0.456017	0.53481	-	-	-	-	1.00259	0.852671	0.850465
Bub1.3	GGAAGCAGTGTTCGGCCTTG	0.211688	0.182819	0.247756	0.206821	0.370887	0.110644	0.285531	0.123059	0.156508	0.158996	1.15791	0.984354	0.850113
Ap3b1.3	GCCTACAACGAGCAGTCGGG	0.818369	0.997524	0.850556	0.892281	0.888878	0.948988	1.31051	1.25335	0.939984	1.35056	0.8204	0.695995	0.84836
Mgat5.1	GGATGGCTACCCCCACTGCG	0.98453	0.963139	1.08022	1.03166	0.918443	0.91874	1.6947	1.55223	1.23963	1.42948	1.02221	0.867189	0.848348
Cd74.2	TGTCTAGGCGGCCCTGTTGC	0.772592	0.861243	0.897662	0.90209	0.787726	0.933699	1.41141	1.23036	0.750251	0.987895	0.897066	0.759444	0.846587
Prkce.1	GTACGTGATCATCGATCTCT	0.262502	0.293558	0.150905	0.087344	0.11105	0.250951	0.0876025	0.11777	0.0955752	0.126292	0.894209	0.756782	0.846314
Tgfb1.2	AACAATTCCTGGCGTTACCT	0.188358	0.327246	0.167878	0.183031	0.127585	0.262653	-	-	-	-	0.575586	0.485754	0.84393
Ap3b1.2	GAGTGGAGACACAGGCACCG	1.00103	0.90951	1.01033	1.01212	1.11357	0.925256	1.47158	1.28797	1.19167	1.2833	1.10062	0.928595	0.843698
Litaf.2	GGTGAGGGCTCCCGCATTGT	0.157173	0.131273	0.109373	0.159438	0.073407	0.103574	0.109219	0.28422	0.145558	0.14438	1.1973	1.00816	0.842029
Mbp.1	CAGCCGAGGTCCCATTGTTC	0.783874	0.829632	0.837802	0.687533	0.785932	0.86992	1.40536	1.09156	0.878942	1.10489	0.944846	0.795504	0.84194
Il2rg.4	GCGAGATTCCCCCCAAAGGA	0.264247	0.158285	0.32738	0.275468	0.243772	0.261652	0.251045	0.173725	0.260883	0.18562	1.66944	1.40547	0.841878
Blnk.2	TCGGAGTCCGAATGTTCATC	0.319397	0.300627	0.395822	0.295876	0.29429	0.329372	-	-	-	-	1.06244	0.893486	0.840978
Havcr1.3	ACAACGACATGTTGGGGCCG	1.07265	1.19398	0.989103	0.949982	0.973597	1.0656	1.63773	1.49817	1.0849	1.44054	0.89838	0.753121	0.83831
Ms4a1.2	GCAGTCCCCCCAGGGTAATA	0.433053	0.438018	0.42015	0.356442	0.346964	0.418795	-	-	-	-	0.988666	0.828481	0.837978
Fcgr2b.1	TGGGGATCAGTAGGAACGGC	0.539866	0.542377	0.647825	0.612476	0.405391	0.487275	-	-	-	-	0.995371	0.831955	0.835824
Ap3d1.2	GCTTGGGTACGACATCAGCT	0.711728	0.663078	0.751801	0.650777	0.694313	0.721978	1.19357	1.14761	0.815049	0.909509	1.07337	0.896142	0.834887
Bcl2l1.2	GTTCCTGACGGGCATGACTG	0.716095	0.69291	0.745591	0.613972	0.798833	0.615923	1.12651	0.980392	0.732825	0.850339	1.03346	0.861803	0.833901
Sphk2.2	GGGGCCGGCGCAGAGCTACG	1.07719	1.00279	0.831028	0.956004	0.846748	0.950632	1.32374	1.19004	0.916637	1.02332	1.07419	0.895745	0.833883
Vav1.2	AGCGCTGTCCTCTGTTGGGA	0.768808	0.509473	0.65746	0.639025	0.751747	0.599906	-	-	-	-	1.50903	1.25311	0.830409
Itgal.1	AAACTCATCTGCGCTTAGGA	0.52501	0.457056	0.494757	0.661631	0.573217	0.531425	0.702284	0.7988	0.512434	0.537443	1.14868	0.953467	0.830056
Leprotl1.1	CAGCCCGATCGCTCCTCCAA	0.287353	0.390924	0.251523	0.228274	0.264391	0.329222	0.221374	0.276331	0.161337	0.264451	0.735061	0.610083	0.829976
Ube2n.1	GATCATCAAGGTAACCGCCC	0.466551	0.479378	0.373641	0.553809	0.428852	0.53113	-	-	-	-	0.973242	0.807432	0.829631
Ada.3	GGATCCCAAAACGACGCATG	0.528945	0.416892	0.460989	0.431465	0.457252	0.434953	-	-	-	-	1.26878	1.05127	0.828564
Klf6.2	GGTATGCTTTCGGAAGTGTC	0.386102	0.387193	0.246901	0.365061	0.291791	0.353394	-	-	-	-	0.997185	0.825681	0.828012
Cd200.1	ATGTGTCTCTTCAACACGTT	0.0428413	0.0642423	0.0267076	0.111946	0.0999679	0.0806372	0.001	0.0476229	0.0405501	0.0735134	0.666871	0.551601	0.827148
Casp3.2	CACCCAGGCCTGCCGGGGTA	0.256374	0.188355	0.241352	0.268309	0.119557	0.192792	0.245472	0.24776	0.165244	0.146829	1.36112	1.12541	0.826827
Socs4.4	AAGGGGAACGTCCGGATTAA	0.27376	0.192387	0.199794	0.173164	0.13662	0.0968474	0.0682291	0.173571	0.0844487	0.0718136	1.42297	1.17594	0.826402
Tnfsf9.4	TTCGGGATCGCGAGGCCGCG	1.14124	1.13666	1.10595	1.17622	1.16123	1.29517	1.67646	1.53171	1.19106	1.4357	1.00404	0.829599	0.826264
Map3k5.4	GGATGTCGAAGATGAACACG	0.158103	0.248385	0.197366	0.192091	0.118401	0.244288	0.175317	0.231049	0.157327	0.299247	0.636526	0.525742	0.825955
Fcgr2b.2	TGGTCAAACTCGAGCCCCCG	0.567359	0.447111	0.618828	0.520269	0.618792	0.59054	-	-	-	-	1.26895	1.04784	0.825757
Cxcr4.3	GCACTCAACTCCATGAGCAG	0.468521	0.530606	0.547143	0.601439	0.501104	0.495412	0.634996	0.762773	0.472654	0.649284	0.882993	0.727962	0.824426
Aimp1.3	GCCCCGCGCACGGTCGTCAG	0.619947	0.940862	0.777461	0.955477	0.740626	0.775601	0.605326	0.646761	0.419365	0.773669	0.658914	0.542047	0.822636
Ect2.3	TCAGCTGAGGGCCGCTTCCG	0.236681	0.309634	0.278814	0.241685	0.223393	0.303614	0.243145	0.281116	0.242071	0.385936	0.764391	0.627232	0.820564
Ada.4	AACCCAAAGTAAGCACCGAG	0.401682	0.354939	0.466725	0.522523	0.331666	0.357938	-	-	-	-	1.1317	0.926601	0.818773
Eif2ak2.1	TGGCTACTCCGTGCATCTGG	0.339793	0.204319	0.345939	0.212452	0.329651	0.19879	0.473621	0.171289	0.190421	0.139969	1.66305	1.36045	0.818049
Rhoh.1	GGTTGGGGAGCATCTAACCG	0.520788	0.497581	0.453034	0.472481	0.417881	0.509106	0.690698	0.821743	0.498455	0.582719	1.04664	0.855395	0.817279
Socs4.3	TAAACATCCCCTCAGCGTGG	0.20886	0.35771	0.199794	0.150656	0.203561	0.225666	0.185385	0.41265	0.124013	0.261642	0.583881	0.473979	0.811773
Cebpg.1	AATCAGAGCAATGTGATCCG	0.213863	0.21458	0.255204	0.196627	0.163391	0.20256	-	-	-	-	0.996661	0.806633	0.809335
Itch.4	GGAACCTGCCGATTGCCAGT	0.657094	0.545536	0.674885	0.503141	0.690023	0.596553	1.04114	0.875096	0.685461	0.703303	1.20449	0.974631	0.809163
Cebpg.2	AATACCGCCAGCGCAGAGAG	0.58086	0.643085	0.640622	0.82917	0.53155	0.727384	-	-	-	-	0.903241	0.730769	0.809052
Sphk2.1	CCAAACTCGCCGTGCAGGAT	0.788067	0.758852	0.692554	0.689022	0.739472	0.772164	1.03399	0.972475	0.712112	0.847651	1.0385	0.8401	0.808956
Aimp1.4	CCCGCTGACGACCGTGCGCG	0.982979	1.04883	0.828128	1.12862	0.87947	1.01069	0.934973	1.22672	0.939592	1.24122	0.937212	0.756989	0.807703
Jak3.1	GAGAATGACAATCGCTGGGG	0.668212	0.596348	0.582011	0.576836	0.555194	0.476853	0.910791	0.772621	0.661696	0.731327	1.12051	0.904788	0.807481
Ptpn2.3	TCTACGGAAACGTATTCGAG	0.162633	0.18568	0.108014	0.13983	0.0668803	0.14106	0.0455197	0.100099	0.0689102	0.0974874	0.875878	0.706862	0.807033
Tgif1.2	GACGGGTGATCTCGGCCCCC	0.417617	0.437411	0.592639	0.42231	0.37408	0.434893	0.592581	0.313248	0.325505	0.422565	0.954749	0.770309	0.806819
Gaa.1	TAAGCGCTACGAAGTGCCCC	0.151285	0.152613	0.191476	0.132166	0.0826989	0.20452	0.25286	0.161726	0.102452	0.128191	0.9913	0.799215	0.806229
Icosl.1	CACCTCTGATAGCTCCAACC	0.350802	0.172687	0.365378	0.236917	0.466513	0.285685	-	-	-	-	2.03143	1.63296	0.803845
Atf1.1	GCGGACAGTACAGTACGTAT	0.158958	0.216811	0.151466	0.119827	0.231479	0.149712	0.248492	0.136889	0.0838274	0.142267	0.733166	0.589226	0.803673
Pik3cd.4	GCTGCGCCTCGTGGCCCGAG	0.710504	0.499975	0.468445	0.480367	0.449341	0.394498	-	-	-	-	1.42108	1.13902	0.801516
Jak3.2	TTATCATTCGCTTTTCGCTC	0.514303	0.498328	0.461365	0.376492	0.41519	0.422137	0.711715	0.647323	0.461802	0.558907	1.03206	0.826259	0.800594
Il22ra1.4	GCTGGTGGCCATCTTCCGAG	0.463108	0.63576	0.465925	0.443662	0.389613	0.633158	0.498596	0.528186	0.286713	0.492132	0.728432	0.582593	0.799791
Plp1.3	AAAGATCTGCCTGACAGCGC	0.714919	0.832157	0.662851	0.875681	0.771477	0.803157	1.20491	0.83091	0.7178	1.04633	0.859116	0.686014	0.798512
Il10rb.4	TCCACGGCTCCAGGTTCCGG	0.815741	0.657814	0.774843	0.543825	0.669767	0.526401	0.838611	0.394535	0.428522	0.432984	1.24008	0.989694	0.79809
Tnfrsf10b.1	TGGGCTGGGTTAGCTGTTAC	0.132163	0.283065	0.233834	0.244918	0.172052	0.258219	0.272362	0.109495	0.0814684	0.219144	0.466902	0.371757	0.796222
Camk1d.2	AGAACTCTTCGATCGGATAG	0.103637	0.0537665	0.197374	0.0339619	0.166757	0.0772872	0.157466	0.107373	0.0942849	0.0616364	1.92754	1.5297	0.793598
Ctrl65.1	TGGTCCAGATCCCTCAGATA	0.429204	0.397668	0.284871	0.448579	0.404644	0.313931	0.564731	0.561311	0.43954	0.513483	1.0793	0.855997	0.793101
Vmp1.1	CTTTGCATCACGGGCTAAAC	0.117082	0.173772	0.0954048	0.176967	0.178307	0.237284	0.0799319	0.112061	0.111424	0.208695	0.673769	0.533907	0.792419
Tcta.2	CATCAGGTGTGGATCCATTC	0.0735834	0.12736	0.0970337	0.0762227	0.101694	0.0475599	0.101049	0.0530414	0.0470473	0.102982	0.577759	0.456848	0.790725
Jak3.4	TCATGCTAAGGCCCACCGGG	0.863339	0.787722	0.796787	0.796326	0.828586	0.88313	1.32347	1.19158	0.850168	0.982788	1.09599	0.865057	0.78929
Stat5a.1	GCAGTGGTTCGACGGGGTGA	0.559646	0.528561	0.52253	0.663968	0.501704	0.600868	-	-	-	-	1.05881	0.834965	0.788587
Inppl1.4	TTAATGAGCTGCCGGACTGG	0.376034	0.298677	0.200853	0.322097	0.369933	0.314347	0.351822	0.352922	0.28391	0.285986	1.259	0.992739	0.788515
Atg12.3	TCCGGGCGAAACTGCAGCCG	0.601855	0.517793	0.713613	0.731306	0.731609	0.893325	0.518555	0.630337	0.663364	0.723944	1.16235	0.916319	0.788335
Ctsd.1	ATAGATGTGAACTTGCGCAG	0.135418	0.107812	0.120701	0.191145	0.139915	0.166338	0.18364	0.112819	0.0921101	0.093049	1.25605	0.98991	0.788111
Cebpg.3	GCGCAGAGAGCGGAACAATA	0.441317	0.313226	0.298039	0.370319	0.392644	0.354164	-	-	-	-	1.40894	1.10865	0.786868
Il2rg.2	TGGGGGGAATCTCGCTGACG	0.292205	0.437289	0.373815	0.414656	0.437035	0.317254	0.397382	0.475715	0.269228	0.512068	0.66822	0.525766	0.786816
Tnfsf9.1	TGTGCAATACAACTCTGAAC	0.319664	0.276277	0.272787	0.28759	0.372766	0.305789	0.392642	0.362649	0.323715	0.355696	1.15704	0.910089	0.786566
Ptprc.1	TCAGTGGTGCGAGCAGGTAA	0.687193	0.826135	0.693333	0.765155	0.536713	0.823083	-	-	-	-	0.831816	0.652076	0.783919
Ptprc.2	GCAGAGGGCGTCTGCGAGTC	0.557082	0.448647	0.517829	0.524762	0.562897	0.579221	-	-	-	-	1.24169	0.971817	0.782656
Tnf.1	CCATAGAACTGATGAGAGGG	0.308261	0.319655	0.322515	0.308198	0.310391	0.322805	0.509488	0.424769	0.253548	0.337011	0.964357	0.752344	0.780151
Cd22.3	GTCCAGAGACCATCGGCAAG	0.475187	0.343164	0.509537	0.335507	0.418356	0.388244	-	-	-	-	1.38473	1.07756	0.778175
Cd274.2	CTGGTTGATTTTGCGGTATG	0.331682	0.388621	0.412046	0.317008	0.360446	0.410318	0.514145	0.50939	0.334127	0.50415	0.853486	0.662753	0.776526
Aoc2.1	GTAGCCAGGTAAAGGTATCG	0.266859	0.204309	0.352239	0.254036	0.236766	0.141482	0.2789	0.257615	0.121028	0.119707	1.30615	1.01104	0.774056
Ceacam1.2	GATGTTGGGCTTTAATAATA	0.312345	0.301904	0.21501	0.309159	0.242226	0.321691	0.435378	0.388933	0.296354	0.370416	1.03458	0.800057	0.773313
Cblb.4	CCCCCAAACCACGACCCCGA	0.170801	0.147756	0.179497	0.145572	0.0872285	0.11463	0.202053	0.168234	0.123917	0.138887	1.15596	0.892215	0.771838
Nfatc1.1	ATGTCGGGGTCGCGCGGCAC	0.78534	0.812075	0.878689	0.912009	0.820122	0.87138	0.624874	0.884535	0.596322	0.799337	0.967079	0.74602	0.771417
Itgav.1	CTGGGTCGTGTTCGCTTTGG	0.138263	0.172585	0.173499	0.173292	0.100496	0.111764	0.139512	0.138559	0.0627064	0.101594	0.80113	0.617227	0.770445
Itgal.4	GAAACTCATCTGCGCTTAGG	1.10671	0.99801	1.08815	1.09555	1.03736	1.01649	1.72483	1.46164	1.02798	1.20324	1.10892	0.85434	0.770428
Cd274.1	GTTTACTATCACGGCTCCAA	0.386817	0.481137	0.43452	0.420018	0.368721	0.431467	0.437914	0.629562	0.384064	0.620351	0.803965	0.619108	0.770069
Btg2.3	GGAGAGGAAACCCACGGCGG	0.206717	0.178349	0.228082	0.085625	0.196998	0.177606	0.290714	0.171003	0.148992	0.167972	1.15906	0.887	0.765279
Bcl2l1.4	CTTTGGCGGGGCACTGTGCG	1.07097	1.14023	1.05994	0.904241	1.06431	1.09277	1.47157	1.40441	0.985768	1.37188	0.939256	0.718551	0.765021
Aldh4a1.2	GTCCCCGACAACGCAGGGGA	0.112103	0.196999	0.084163	0.144255	0.152281	0.15818	0.177172	0.209088	0.0840178	0.193192	0.569055	0.434892	0.764235
Hdac7.4	CCAACCCATGGACCTGCGGG	0.965354	0.768907	0.769417	0.758678	0.709402	0.740221	-	-	-	-	1.25549	0.958365	0.76334
Cd47.1	CCACATTACGGACGATGCAA	0.604155	0.643247	0.598363	0.632275	0.650692	0.626351	0.84457	0.870381	0.625181	0.872379	0.939227	0.716639	0.763009
Prkd2.4	GATCCCGGCTCCGGGTTCGG	0.789471	0.667874	0.935973	0.757545	0.781323	0.608522	0.868083	0.917936	0.903533	1.00185	1.18207	0.901863	0.762955
Apoe.2	CTCCATGTCGGCTCCGAGTC	0.974363	0.875947	0.855273	0.86911	0.775236	0.812907	1.33884	1.23127	0.904167	1.06605	1.11235	0.848145	0.762477
Bcl6.2	GGAGGATGCAAAACCCCTCA	0.302683	0.362088	0.375727	0.380013	0.272829	0.428266	-	-	-	-	0.835936	0.637054	0.762084
Cd79a.3	CACGCGGAGGTAAGTACCAC	0.614332	0.675001	0.672553	0.581995	0.449401	0.649454	-	-	-	-	0.91012	0.691968	0.760304
Cat.3	AATTTCACTGCAAACCCCCG	0.0835718	0.0955601	0.145208	0.0844946	0.0838385	0.0785463	0.139512	0.0688495	0.0587721	0.0884135	0.874547	0.664742	0.760098
Tnfrsf8.3	GCGCCCTACTCACCGCAGCG	1.13716	0.97155	1.1569	1.13737	1.22315	0.925384	0.673794	0.855063	0.675937	0.761204	1.17045	0.887985	0.758667
Sema4d.3	GCGAGTCCTCACGATCCGTG	0.561076	0.405683	0.430794	0.534828	0.430795	0.410632	-	-	-	-	1.38304	1.0491	0.758548
Dgkz.2	GAGGCTCGACGCAGGCAGCG	0.644111	0.687482	0.737728	0.686019	0.529617	0.553036	0.567739	0.539687	0.313235	0.441259	0.936914	0.709867	0.757666
Ctrl1.1	GGTGGAGCAGGGCTTGTGGG	0.330918	0.402772	0.402158	0.407445	0.307066	0.493429	-	-	-	-	0.821601	0.622311	0.757438
Ddb2.2	CAAGAAGAAAGTAGCCCACG	0.164373	0.14369	0.108513	0.120989	0.0999731	0.13971	0.0790085	0.140423	0.0688958	0.0795503	1.14394	0.866065	0.757091
Cd74.3	GCCATCCGCATCTGGCTCAC	0.85253	0.756253	0.853174	0.910074	0.79711	0.749246	1.14227	1.33177	0.941869	1.10579	1.12731	0.851759	0.755569
Cd40.2	ACATGCCTCGCAATCCTTGC	0.345145	0.300385	0.371517	0.389239	0.349317	0.40256	-	-	-	-	1.14901	0.867739	0.755206
Pag1.2	GCAGGAAGCGTACTGAGCAG	0.474108	0.423528	0.604146	0.519723	0.448501	0.454049	0.68759	0.556623	0.480405	0.568932	1.11943	0.844397	0.754312
Itch.1	TTTCATGGTCAGACTACCCA	0.385594	0.461901	0.452308	0.488759	0.559891	0.562095	0.652171	0.710823	0.487484	0.775886	0.834798	0.628292	0.752628
Crlf2.4	GTGGCCTTGGCACGGTGCAG	0.818161	0.883191	0.833719	0.772776	0.723536	0.656903	0.6135	0.485847	0.481275	0.691511	0.926369	0.695976	0.751294
Litaf.4	GTTCTGCGTAGACGCCCTAC	0.124749	0.155895	0.122061	0.105854	0.059995	0.173227	0.0923385	0.0857865	0.0693326	0.115399	0.800208	0.600807	0.750814
Vav2.3	CCAGCTCCTCGCCAGCCGAG	0.679861	0.761833	0.628536	0.914226	0.608481	0.909724	-	-	-	-	0.892402	0.668864	0.74951
Atp7a.1	CTGTTCAATGGTCCGGACAC	0.858783	0.821239	0.964187	0.870083	0.954508	0.930446	1.54069	1.17006	0.833274	1.06721	1.04572	0.780793	0.746659
Tcta.3	ATGACTGGCCAGCGCCCCAC	0.506704	0.504997	0.604792	0.476147	0.346126	0.45484	0.5695	0.467381	0.303386	0.405706	1.00338	0.747796	0.745276
Mxi1.3	CCTGCGCTCCAAAAACTCCG	0.184847	0.105302	0.109068	0.126635	0.244691	0.110416	0.190449	0.0843247	0.134319	0.10291	1.75541	1.3052	0.743534
Tcf3.2	CCCAGGCGTCTTACCCGGCT	0.710994	0.576862	0.466151	0.570956	0.570978	0.624233	-	-	-	-	1.23252	0.914687	0.742127
Traf3.1	CTAAAGCTGCAGCCTGATCG	0.708299	0.547304	0.686177	0.501202	0.564678	0.588068	-	-	-	-	1.29416	0.960226	0.741968
Tnfrsf14.3	GCATGGGCGGTATATGTCTG	0.277957	0.384157	0.251447	0.373458	0.127664	0.390677	0.135458	0.382963	0.11506	0.214887	0.723549	0.535445	0.740026
Leprotl1.2	GAAGAGGGGCCAGTATTGGC	0.205868	0.276393	0.401079	0.312534	0.277616	0.361441	0.240101	0.422342	0.19174	0.347965	0.744838	0.551032	0.739802
Sphk2.4	TCCACGGTAGGTATGCAACG	0.495088	0.450332	0.519813	0.417087	0.486299	0.455392	0.685678	0.734647	0.492488	0.609341	1.09938	0.80823	0.735167
Ticam1.4	GCTGGGCCAACTCCAGAATG	0.393944	0.396917	0.2458	0.375208	0.21011	0.288186	-	-	-	-	0.99251	0.729077	0.734579
Atp7a.4	CGGCTGGTACTTCTACATTC	0.487043	0.391769	0.51716	0.407745	0.485396	0.381142	0.68257	0.713685	0.554883	0.60866	1.24319	0.911646	0.733313
Pik3cd.3	GGTCCCCCTCTCGGGCCACG	0.652851	0.437422	0.709337	0.595064	0.593113	0.543549	-	-	-	-	1.4925	1.09118	0.731115
Inpp5b.1	CCCTACTTACGCATGCTCCT	0.146438	0.120172	0.130725	0.145504	0.102821	0.0995786	0.114388	0.144104	0.0780739	0.0879004	1.21858	0.888208	0.728889
Apoe.1	CTACACAGGATGCCTAGCCG	0.502422	0.444806	0.520007	0.481412	0.46885	0.52472	0.74315	0.558907	0.46453	0.564397	1.12953	0.823054	0.728668
Flot2.2	CCACACGGTGGGCCCCAACG	0.569471	0.40222	0.425601	0.456221	0.470654	0.483537	0.702139	0.439748	0.346261	0.335815	1.41582	1.03111	0.728277
Cd47.3	CCACATCTCCGCGCCGCCGG	1.49813	1.20665	1.44327	1.36041	1.23429	1.27056	1.9061	1.72584	1.36602	1.51092	1.24156	0.904097	0.728193
Nhej1.2	CCCTATGCATAGAGCTCGGC	0.508707	0.577407	0.428297	0.514271	0.391131	0.611932	-	-	-	-	0.88102	0.639173	0.725491
Pold4.2	CCTGGGTGGCCGCCATGGGT	0.215761	0.243186	0.250331	0.286922	0.248525	0.285816	0.217487	0.305889	0.150035	0.233392	0.887226	0.642845	0.724556
Tgfbr1.4	GGCGGCGACGCTGCTCCCGG	0.489297	0.415991	0.427483	0.639308	0.435981	0.424186	0.486399	0.38472	0.401229	0.471386	1.17622	0.851168	0.723646
Ticam1.2	GTACAGGCGAGCCACCGTCC	0.43018	0.395263	0.56257	0.437043	0.39613	0.50312	-	-	-	-	1.08834	0.787347	0.723439
Casp3.1	GTCCAGCTCCGTACCCCGGC	0.495822	0.686122	0.481927	0.479306	0.530415	0.499352	0.452217	0.546328	0.336024	0.643466	0.722644	0.522209	0.722636
Itch.2	CCAGGGGGCAACGGACCAAG	0.714896	0.642128	0.763006	0.766967	0.814872	0.766557	1.15129	0.95371	0.661506	0.823233	1.11332	0.803546	0.721755
Jak2.4	CAGATACGGAGTGTCCCGTG	0.240969	0.142529	0.134534	0.162081	0.15556	0.0641826	0.211309	0.0565723	0.205014	0.168117	1.69066	1.21947	0.721298
Stat5b.4	CAAGAGGTCTGACCGCCGTG	0.588241	0.423038	0.584364	0.498826	0.505956	0.505431	-	-	-	-	1.39052	1.00104	0.719905
Cxcr5.1	TAACTTCTGCTCTACAGTCG	0.345581	0.29085	0.28835	0.264306	0.246721	0.29011	-	-	-	-	1.18818	0.85044	0.715753
Pik3r1.4	AGCAACAGGAAGCGGTCGAG	1.39674	1.00591	1.52991	1.30678	1.21224	1.22515	-	-	-	-	1.38853	0.989466	0.712601
B4galnt1.4	GATGATGGTGGGTACAGCCG	0.18811	0.159509	0.148733	0.168082	0.339806	0.132127	0.162559	0.142751	0.120191	0.143201	1.17931	0.839316	0.711699
Ttc39b.1	CCGCTGGTGGCCATGTCCGA	0.224848	0.276119	0.205282	0.32283	0.29491	0.22529	0.285709	0.293972	0.152892	0.264071	0.814314	0.578982	0.711005
Pik3cd.2	GAGACCTGTGCGGTCCCCGG	0.217905	0.158705	0.242266	0.177325	0.19987	0.204965	-	-	-	-	1.37302	0.975145	0.710219
Mif.2	CACGTGCACTGCGATGTACT	0.475706	0.42776	0.489135	0.468721	0.350991	0.455148	0.667987	0.647976	0.437258	0.556179	1.11209	0.786182	0.706943
Smad3.4	AGCAGGCGCTTCACGATCGG	0.144297	0.148453	0.140137	0.147205	0.048529	0.156524	0.143939	0.162241	0.109577	0.159527	0.972005	0.686888	0.706671
Tubb2a.2	CTAAGGTGGGCTCACCCCTA	0.0756768	0.0697648	0.0647433	0.0595939	0.0258917	0.0639088	0.0328979	0.0710487	0.0260553	0.0340466	1.08474	0.765282	0.705497
Pbx3.4	TCCGCCCCTTCGTGGCCGTG	0.703684	0.653133	0.863207	0.607467	0.826808	0.701219	0.880475	0.671156	0.503555	0.6634	1.0774	0.759052	0.704524
Cd81.3	CGGAACAGCTCCGTGTACTG	0.487988	0.455818	0.468806	0.493847	0.440098	0.58355	-	-	-	-	1.07058	0.754174	0.704455
Pik3r1.3	GAGCAACAGGAAGCGGTCGA	1.39629	1.00477	1.52991	1.31642	1.21224	1.23977	-	-	-	-	1.38965	0.977798	0.703628
Ap3b1.4	GAAGAGGCCGAAGGCGCCCG	0.997511	1.06185	0.950463	1.1423	1.01804	1.08556	1.49276	1.50822	0.987727	1.49479	0.939412	0.660778	0.703396
Ect2.1	AAGTTGTCCTGGAAAATCGG	0.18062	0.210516	0.115967	0.116917	0.122351	0.132261	0.0403398	0.279992	0.0868804	0.143991	0.857987	0.603375	0.703245
Ptprs.3	GATGCGCTACGAGGGCGTGG	0.202734	0.261838	0.214314	0.261497	0.295246	0.308456	0.247273	0.317195	0.14388	0.264598	0.774273	0.543767	0.702293
Plp1.1	GATCTGCCTGACAGCGCCGG	1.16677	1.21399	1.05407	1.00889	1.12097	1.16151	1.5378	1.65447	1.02608	1.52048	0.961105	0.674842	0.702152
Plp1.2	AAGGACGGCGAAGTTGTAAG	0.603277	0.556788	0.671859	0.708869	0.548234	0.580518	0.808476	0.754812	0.582541	0.766114	1.0835	0.760384	0.701788
Cst3.3	ATTGGCATCTGCCTCCTCCG	0.0562012	0.0895438	0.0526681	0.0519484	0.103889	0.0376057	0.110583	0.0482801	0.0195621	0.0444278	0.627639	0.440313	0.701538
Bcl2l1.3	GATCCAGGAGAACGGCGGCT	0.740284	0.762681	0.764031	0.777877	0.717178	0.867003	1.15927	1.0824	0.706754	1.03795	0.970633	0.680915	0.701517
Fn1.2	GCAGGTACAGTCCCAGATCA	0.388178	0.461478	0.431435	0.504916	0.399748	0.447432	0.721168	0.696907	0.372301	0.632204	0.841164	0.588894	0.700094
Malt1.2	AAACTGTGCTGCCGGGCAAC	0.697744	0.468013	0.633628	0.568586	0.616538	0.592209	-	-	-	-	1.49086	1.04108	0.698308
Icosl.4	CATCCCCACGAGATGTCCAA	0.583904	0.498522	0.430989	0.343567	0.406608	0.497443	-	-	-	-	1.17127	0.817396	0.697871
Cd74.1	GGTTAGAGATGAGGTCGCGT	0.628299	0.59013	0.578577	0.561729	0.571099	0.658047	0.933162	0.856465	0.638494	0.859441	1.06468	0.742918	0.697785
Ebi3.3	GCTCACCTGGCGGAAGTGAG	0.91572	0.877234	0.802214	0.876945	0.873677	0.900245	1.31776	1.28923	0.941535	1.2938	1.04387	0.727731	0.697146
Ldlr.2	CATCCTGGGAGCACGTCTTG	0.680371	0.794983	0.700808	0.743772	0.581307	0.866152	0.996221	1.00528	0.499187	0.836708	0.855832	0.596609	0.69711
Marcks.3	GGACGCCGCGGCCTCGTCGG	0.727676	0.659899	0.838354	0.717235	0.77701	1.01879	0.651016	0.797993	0.63335	0.824711	1.10271	0.767967	0.696437
Ifnar1.3	GCGGTGACAGTAATGACCGG	0.75352	0.723652	0.840591	0.671913	0.701825	0.698134	1.16333	0.951137	0.745477	1.02885	1.04127	0.724576	0.695855
Akap17b.4	GAGAGATGTCTACGCTAAGG	0.206282	0.119163	0.156091	0.168158	0.138679	0.115193	-	-	-	-	1.73109	1.20389	0.695453
Apoe.3	ACTCGGGCAGTACCGCAACG	1.08965	0.966517	1.04275	1.04307	1.0691	0.968282	1.54989	1.41946	1.0754	1.37223	1.1274	0.783689	0.695132
Faim3.2	TGTTCACTCCCGTGGAGCCA	0.27146	0.181839	0.15713	0.136224	0.1887	0.179353	0.170765	0.168659	0.0727262	0.0701539	1.49285	1.03667	0.694418
Fadd.4	GAGCAGAACGACCTGGAGCG	0.431753	0.336395	0.274495	0.298635	0.224793	0.199838	0.301082	0.248644	0.119106	0.133878	1.28347	0.889662	0.693169
Faim3.4	GTGCGGGCCGACTAGCGATG	0.657209	0.694058	0.656389	0.766627	0.623595	0.742936	0.820023	0.543476	0.363422	0.553764	0.946908	0.656275	0.693072
Rpa2.2	CGATATGACAGCTCCGCCCA	0.162825	0.0895783	0.178437	0.155507	0.166566	0.16982	0.0690396	0.088181	0.145558	0.115551	1.81769	1.25969	0.69302
Igbp1.3	TGACAGCAATCCACCTCCGA	0.514206	0.430423	0.479916	0.565361	0.483466	0.58453	-	-	-	-	1.19465	0.827103	0.692338
Tnfrsf13b.3	TCCTCTACGCCTGAGGAAGG	0.342316	0.284675	0.40917	0.382389	0.335101	0.403906	-	-	-	-	1.20248	0.829652	0.689949
Csf2ra.3	AACCAGCAGCGGCAACCGAA	0.322659	0.271725	0.375069	0.257433	0.371204	0.283255	0.281527	0.260285	0.202668	0.248176	1.18745	0.81663	0.687719
Litaf.1	CTGGTCCCGGCATAGGTGCT	0.122266	0.112694	0.177503	0.113825	0.0733268	0.110657	0.159772	0.12007	0.0465548	0.0625086	1.08493	0.744775	0.68647
Smad3.2	GCCACGCCACACCGAGATCC	0.163645	0.199895	0.182191	0.184848	0.109519	0.160379	0.113776	0.258732	0.0921097	0.164103	0.818654	0.561291	0.685626
Ifnar1.2	AGACTTCTGCCAGATTCGTA	0.540356	0.403636	0.560151	0.532228	0.56095	0.379319	0.847851	0.564145	0.592554	0.645952	1.33872	0.917334	0.685231
Dnase1.4	GCGGCTCACTGACTACATAG	0.42987	0.324859	0.426108	0.298032	0.289391	0.319287	-	-	-	-	1.32325	0.906365	0.684952
Fas.2	CTGGTAAGCTTTGGGACGCC	0.777168	0.656354	0.674543	0.749283	0.752958	0.744263	1.0322	0.952188	0.753146	0.928976	1.18407	0.810727	0.684696
Tmem109.1	GGGCTGATGCGGAGTGGACG	0.299814	0.361081	0.290513	0.341086	0.351988	0.33165	0.334323	0.403861	0.308497	0.543256	0.830322	0.567866	0.683911
Ttc3.2	ATCACAGTAATCTTGCAGGA	0.120044	0.187084	0.0939063	0.171698	0.175687	0.216073	0.0687369	0.146537	0.0564944	0.129244	0.64166	0.437114	0.681224
Car2.3	CATGGTCACGCCGGTGATTG	0.0150923	0.0286807	0.0219788	0.0412624	0.0310579	0.0444655	0.0321916	0.0167835	0.0187294	0.0523093	0.526216	0.358052	0.680428
Malt1.3	GCCAAGCTAGACATGCACCG	0.463551	0.354898	0.561134	0.377104	0.401956	0.452307	-	-	-	-	1.30616	0.88868	0.680379
Cst3.1	TTGTTTTGGGGTCGCCGCCC	0.70538	0.713928	0.623362	0.860109	0.788852	0.600471	0.670229	0.76293	0.523772	0.780157	0.988026	0.671368	0.679504
Ltb.2	AGCCAATGATCTTCTCAACC	0.175914	0.172041	0.232384	0.207106	0.206048	0.110988	0.132721	0.159063	0.072976	0.105105	1.02251	0.694316	0.67903
Sema4d.1	CAAGAACAGCCCCCTAACGG	0.548427	0.593464	0.446318	0.666352	0.402435	0.642017	-	-	-	-	0.924112	0.626829	0.678304
Ifngr2.2	CTCGCTTGGCTCGCACCCGC	0.580672	0.428469	0.593447	0.361477	0.596016	0.397328	0.511849	0.31401	0.517587	0.5636	1.35522	0.91836	0.677644
Pag1.1	TGCTCAGTACGCTTCCTGCA	0.554661	0.505799	0.527395	0.472174	0.518742	0.467753	0.729187	0.829087	0.562078	0.756651	1.0966	0.74285	0.677409
Ctrl1.4	CCTGTCCAGCCGGCTTGACC	0.497699	0.402772	0.491961	0.412847	0.394589	0.47176	-	-	-	-	1.23568	0.836419	0.676887
Flt3l.3	AACAGTCAGGTGTCCCCCGC	0.468675	0.425909	0.319054	0.307248	0.355859	0.416318	0.356629	0.245652	0.306979	0.413763	1.10041	0.74192	0.674221
Fadd.1	CCCGCTCACTCAGACTTCGG	0.168308	0.220682	0.312128	0.305535	0.266741	0.252343	0.265599	0.25027	0.120763	0.235159	0.762672	0.513538	0.673341
Bcl6.4	TGGTGATGGCGCCGTGCTTC	0.701335	0.415956	0.729872	0.591015	0.636912	0.561422	-	-	-	-	1.68608	1.13446	0.67284
Ikbkb.4	TCACACATACCCCGTGACGG	1.09538	1.14036	1.11551	1.08025	0.956359	1.18032	1.84322	1.54403	1.07603	1.66934	0.960551	0.644586	0.671059
Pfn2.3	CGTCTGGGCAGCCACGGCCG	0.779487	0.760581	0.800844	0.815376	0.811264	0.777226	0.785734	0.78747	0.521192	0.758899	1.02486	0.686774	0.670117
Inpp5b.2	TCATCCCGCCGCCCGGCGAG	1.18747	1.11255	1.2085	1.09653	0.841394	0.945203	1.17663	1.10763	0.584348	0.817165	1.06734	0.715092	0.669973
Psmb9.3	TGACATGGCCGCCTACCAGC	0.427905	0.541906	0.361445	0.570126	0.468655	0.52287	0.408788	0.746248	0.280916	0.531071	0.789628	0.528961	0.669886
Rhoh.2	GGTCCAGCCGCAGAACCAGA	1.16462	1.05112	1.02252	1.17018	1.0879	1.12537	1.91566	1.66269	1.13944	1.53575	1.10798	0.74194	0.669635
Ctsd.2	TGCCGATATCGCCATAGTAC	0.0970869	0.16621	0.134859	0.139909	0.0723874	0.143469	0.0600796	0.179052	0.061464	0.157157	0.584121	0.391098	0.66955
Smpd1.4	GATCCACTTTGCTGCCGCCG	0.181269	0.150801	0.242286	0.217107	0.246357	0.225204	0.273539	0.0694181	0.116751	0.145307	1.20204	0.803478	0.668429
Rbm39.4	TGTAATGCTTGTTGTGCGGC	0.143787	0.162393	0.139955	0.214112	0.0966368	0.241082	0.147306	0.202767	0.126753	0.214183	0.885426	0.591799	0.668378
Cd81.1	TGATCCTAGGTGTAGCTCTG	0.146454	0.128843	0.185487	0.189076	0.148917	0.196306	-	-	-	-	1.13669	0.758595	0.667372
Cd48.3	TTACCTCACACGATAGCCTC	0.403854	0.261147	0.320972	0.281997	0.3536	0.324635	0.546065	0.435345	0.43531	0.421977	1.54646	1.0316	0.66707
Aoc2.3	TCTCCTCTTTGGGAACCGTG	0.111247	0.0728397	0.0922894	0.0797964	0.0424631	0.0965197	0.001	0.0391811	0.0693326	0.0681503	1.52728	1.01735	0.666117
Itgav.3	CCACAGCAGCCAAAACGGCG	0.157961	0.172426	0.19771	0.164296	0.1196	0.146211	0.184857	0.143332	0.0950646	0.155797	0.91611	0.610181	0.666056
Cd180.2	GTCCAGAAGGCAATTCACTC	0.248439	0.243659	0.283305	0.208061	0.184233	0.271398	-	-	-	-	1.01961	0.678832	0.665773
Ddost.1	GGTTTCTTTCCTCCAGACCG	0.377972	0.390917	0.426957	0.344099	0.410854	0.367798	0.477671	0.496103	0.314168	0.489178	0.966886	0.642237	0.664232
Nlrc4.1	ACAGACGAGCCCTTATTCAA	0.165327	0.228582	0.236708	0.171919	0.102995	0.237222	0.160754	0.165521	0.0904094	0.188724	0.723271	0.479057	0.662348
Tnf.4	TGGGCCATAGAACTGATGAG	0.394214	0.321327	0.354913	0.442511	0.50612	0.461055	0.757636	0.597985	0.52898	0.652518	1.22683	0.810674	0.660786
Ceacam1.1	TGAAAACTATCGTCGTACTC	0.337749	0.290358	0.382545	0.293079	0.309667	0.403534	0.558499	0.477387	0.342959	0.44911	1.16322	0.76364	0.65649
Itgb2.4	TAATCCTGAGTTCGACCAAC	0.569915	0.433948	0.518094	0.383167	0.532844	0.504959	0.684759	0.661623	0.516949	0.599991	1.31333	0.861595	0.656041
Havcr1.2	GGAATCACAACGACATGTTG	0.571367	0.482622	0.475881	0.410162	0.433096	0.397256	0.696617	0.517929	0.434746	0.560711	1.18388	0.775347	0.65492
Smad3.1	GTCACTGGATGGTCGGCTGC	0.189101	0.167011	0.200652	0.171748	0.213002	0.256745	0.248655	0.235907	0.133994	0.181384	1.13227	0.738728	0.652432
Il16.3	ACTGTTGACTACACAATCCG	0.108129	0.0404582	0.099544	0.0394287	0.0673844	0.0350715	0.0671993	0.0658283	0.0548459	0.0314751	2.67261	1.74252	0.651989
Fn1.3	GGTGACCTACTCGAGCCCTG	0.380251	0.409433	0.32992	0.361544	0.423016	0.400367	0.614587	0.59364	0.349986	0.578006	0.928727	0.605506	0.651975
Ctrl65.2	CTCGTAGCCATTGGGATAGC	0.473011	0.386103	0.453034	0.420863	0.481804	0.411235	0.680179	0.526304	0.40009	0.502156	1.22509	0.796744	0.650355
Pfn1.4	CCCGGGGACGGCGGCCCAGA	0.812804	0.848796	0.911087	0.770058	0.998656	0.817053	0.783405	0.838428	0.446452	0.717305	0.957596	0.622402	0.649963
Ddit4.3	GGAGCGCGGCGGCCGATCAG	0.651332	0.64508	0.607578	0.700985	0.691444	0.701628	0.755757	0.606718	0.361006	0.550579	1.00969	0.655684	0.64939
Isg20.3	CTACAGAACCCAAGTCAGCG	0.198185	0.46593	0.294647	0.487813	0.233115	0.344027	0.294227	0.428412	0.135224	0.489715	0.425353	0.276129	0.649175
Eea1.3	GGAGACCGAGCGCCAACTGG	0.219163	0.274078	0.265704	0.286878	0.183326	0.240975	0.261126	0.27334	0.113103	0.218139	0.799636	0.518489	0.648406
Crlf2.3	GGCACTGCGCGACGGAGGCG	0.653031	0.657046	0.844133	0.429343	0.733698	0.560578	0.62857	0.674137	0.471498	0.732157	0.993889	0.643985	0.647944
Atp5c1.4	GGGCTTACAAGCGTTCTTGC	0.242449	0.172333	0.259982	0.189329	0.200292	0.213595	0.273539	0.166291	0.143159	0.157137	1.40686	0.911042	0.64757
Havcr1.4	CAACGACATGTTGGGGCCGA	0.859201	0.77138	0.875116	0.85799	0.864315	0.833005	1.20998	1.11417	0.77855	1.08106	1.11385	0.720174	0.646563
Map4k2.4	CGTGTCGCTGCAGGATCCGC	0.466035	0.679867	0.549228	0.535026	0.400482	0.59216	0.42041	0.550549	0.303863	0.685933	0.685479	0.442992	0.646252
Tnfaip3.2	GCCCGGCAGCGCTGTTTAGG	0.798414	0.676799	0.906462	0.679862	0.792526	0.497874	0.861003	0.682314	0.636097	0.8345	1.17969	0.76225	0.646143
Tpd52.3	AGCGGGAACACCTCGCCGCC	0.595003	0.550572	0.669907	0.615605	0.478979	0.687249	-	-	-	-	1.0807	0.696951	0.644907
Rps6ka4.3	GGAGAACACTCAGCGAGAGG	0.382593	0.2931	0.460907	0.30533	0.518297	0.219676	0.635539	0.241914	0.242279	0.288771	1.30533	0.839	0.64275
Mbp.3	TTTCCCATGGCGACCCAATG	0.762846	0.692673	0.699569	0.765999	0.667392	0.722669	0.976652	1.11874	0.658698	0.933468	1.10131	0.705646	0.640735
Acvr2a.1	GAGAACATACTACAGTTCAT	0.161068	0.199866	0.157624	0.294847	0.246695	0.20508	0.0856883	0.214888	0.0742683	0.143915	0.805882	0.516056	0.640362
Ifngr1.1	ATTAGAACATTCGTCGGTAC	0.124338	0.140127	0.150101	0.140987	0.0696244	0.141014	0.093648	0.109248	0.0506719	0.0892774	0.887327	0.567578	0.639649
Dgkz.3	CATTTCCAACGAAAGGCACG	0.0817838	0.0910683	0.0943471	0.0913147	0.0920135	0.0975823	0.0964494	0.0823057	0.0440877	0.0769777	0.898049	0.572733	0.637753
Leprot.1	TTTAACGCCCGCCATGTCTC	0.339175	0.632053	0.472997	0.585367	0.283407	0.733274	0.474694	0.412703	0.167897	0.490943	0.536625	0.341989	0.637297
Socs6.3	GCACCACTCGCCCCCGGCAG	1.99547	2.14834	1.76622	2.45918	1.90284	2.62448	1.76911	2.88736	1.75814	2.97358	0.928842	0.591252	0.636548
Btla.4	TGGGACTCCTCGGTTATTTA	0.447444	0.339869	0.369397	0.395389	0.362126	0.333547	0.633379	0.482822	0.366149	0.437012	1.31652	0.837848	0.636411
Socs6.4	GGCACCACTCGCCCCCGGCA	1.99491	2.1477	1.76622	2.45792	1.90326	2.62427	1.76896	2.8862	1.75732	2.97297	0.92886	0.591101	0.636372
Gnpat.4	GGAGTCCACCACTGTACGTG	0.264859	0.339058	0.190566	0.211525	0.148096	0.265585	0.222402	0.143352	0.102671	0.206928	0.78116	0.496167	0.635167
Tgif1.3	TGGGTTCCGCCAGCGCGTAG	0.282145	0.361963	0.298321	0.393608	0.323579	0.280018	0.374593	0.459774	0.223676	0.451829	0.779485	0.495045	0.635093
Ceacam1.3	TCCAATGTCATTCGACAAGC	0.597441	0.626442	0.515096	0.68081	0.478459	0.619113	0.77198	0.812577	0.486614	0.804746	0.953705	0.604681	0.634033
Icosl.2	GCTCCCTTGGACATCTCGTG	0.561861	0.56017	0.642232	0.644829	0.463426	0.728827	-	-	-	-	1.00302	0.635851	0.633938
Ctrl66.1	CATTCGCCTGGCTATCCCAA	0.122848	0.053577	0.0642655	0.0538126	0.0671831	0.0559448	0.120913	0.051215	0.0861141	0.0592756	2.29292	1.45277	0.633592
Hdac5.2	GCAAAGAGAGTAAGGCCCGT	0.215523	0.201886	0.177378	0.100873	0.0998468	0.14772	-	-	-	-	1.06755	0.675919	0.633152
Tap1.3	TATCGGCGATGCCTACTGTG	0.109306	0.0604732	0.07804	0.121569	0.101107	0.0653811	0.06883	0.111334	0.0864715	0.0757898	1.80751	1.14094	0.63122
Wdpcp.1	TCACTTACCCGCAATGTGTA	0.135596	0.149576	0.113349	0.167865	0.12526	0.144475	0.175859	0.0502762	0.056958	0.0996712	0.906535	0.571459	0.630377
Bub1.2	GGATTCCAGTAAGGCGTGCT	0.169789	0.192585	0.143709	0.152834	0.108993	0.164682	0.258104	0.196915	0.0691255	0.124925	0.88163	0.553337	0.627629
Aldh4a1.4	GGTGGGCCAGCAGCCCTTCG	0.233624	0.200585	0.256184	0.193448	0.316853	0.223329	0.248627	0.304573	0.192376	0.263281	1.16471	0.730688	0.627354
Vmp1.4	AAGTGAAGCGGGCACACCGC	0.363025	0.394358	0.324234	0.398792	0.222604	0.264932	0.2836	0.340142	0.132683	0.229838	0.920546	0.577291	0.627118
Akap17b.3	GACTGCATTGAAATCACCCG	0.220945	0.228474	0.267128	0.366738	0.175159	0.289487	-	-	-	-	0.96705	0.605066	0.625683
Faim3.3	GCTTACCTGCGGAGAAGCGG	0.324082	0.408187	0.303911	0.582689	0.359802	0.434016	0.55681	0.405728	0.199187	0.401533	0.793956	0.496067	0.624804
Pde6d.4	GGCTTCAAACTGTATCCGCC	0.493155	0.463805	0.485851	0.422268	0.311254	0.357585	0.467456	0.403951	0.255861	0.385936	1.06328	0.662962	0.623506
Ceacam1.4	ACCTGCTTGTCGAATGACAT	0.327819	0.265944	0.285571	0.391776	0.335093	0.378385	0.45797	0.400388	0.288588	0.3756	1.23266	0.768337	0.623316
B2m.4	CCGAGCCCAAGACCGTCTAC	0.646912	0.6489	0.76776	0.642883	0.797814	0.704239	1.21087	0.99661	0.584921	0.947061	0.996936	0.617617	0.619515
Cxcr4.2	CTTTGCCGACGTCAGCCAGG	1.15497	0.965458	1.11055	0.948553	1.08848	0.928285	1.57356	1.40719	1.00753	1.36043	1.19629	0.740592	0.619075
Psen2.4	GAGCCCCACTGCATGCGTAG	0.166	0.182722	0.227624	0.236808	0.158174	0.16147	0.234301	0.154476	0.0678641	0.120817	0.908486	0.561708	0.61829
Ccnd3.1	GCTTTGCATCTATACGGACC	0.409975	0.316682	0.354774	0.460729	0.470193	0.337587	0.658654	0.498335	0.414838	0.518334	1.29459	0.80033	0.618209
Nrip1.1	GCTGTGCTAAGGAAGTTGCG	0.175601	0.239563	0.222429	0.205849	0.252171	0.249453	0.136427	0.260825	0.11192	0.247745	0.733006	0.451756	0.616306
Btg2.2	GTGGCTCATACCGGTGGCTG	0.172642	0.230142	0.169192	0.174834	0.157326	0.15248	0.139762	0.177068	0.0777385	0.168211	0.750155	0.462148	0.616069
Tnfrsf10b.4	TGCGCTTCGGGAGTGGCCGG	0.7703	0.616775	0.869434	0.819005	0.937839	0.744957	0.763343	0.716932	0.586275	0.763089	1.24892	0.768292	0.615167
Nrp.1	AGCGCACTGCGTTCCAGTAC	0.103058	0.115309	0.0840339	0.0533938	0.0353297	0.0329694	0.0765436	0.0315524	0.0258482	0.0470914	0.893756	0.548895	0.614144
Ets1.2	TCTGCAGGTCGCACACAAAG	0.505191	0.553415	0.362163	0.386895	0.383627	0.460802	0.522428	0.273781	0.309164	0.551672	0.912862	0.560413	0.613908
Ifnar2.2	CACGTCACATGATGACTTCG	0.0417705	0.0695038	0.0516222	0.0388739	0.113089	0.0492243	0.0357179	0.0996815	0.0243701	0.0662574	0.600981	0.367809	0.612014
Ptprc.3	CAGGGGAGAGGACTGTACCG	0.634132	0.357549	0.592186	0.539222	0.596858	0.550108	-	-	-	-	1.77355	1.08498	0.611757
Fth1.3	GAACTACCACCAGGACGCGG	0.124658	0.187619	0.157652	0.198868	0.11826	0.225372	0.209319	0.188926	0.0529372	0.130316	0.664419	0.406221	0.611392
Ttc3.4	CCATGAGGATCCCGGACTGG	0.101826	0.0524765	0.0566204	0.0534071	0.149408	0.0538189	0.102271	0.0673827	0.109297	0.0923771	1.94041	1.18316	0.609746
Tbc1d22a.3	CCACTCCGGTGAAGGCCAAG	0.079869	0.0918122	0.103533	0.0572947	0.0723538	0.0882597	0.0439192	0.0671925	0.0411033	0.0775291	0.869917	0.530166	0.609444
Cd19.2	TGGGTCCCGTTTCCCGAGGG	0.712481	0.532316	0.817262	0.646447	0.445096	0.546091	-	-	-	-	1.33846	0.815059	0.608955
Cmtm3.4	GAAGGCGCGCGCGGGCAACA	0.912402	0.975679	1.10184	1.22724	0.966565	1.24805	0.762134	1.08252	0.706937	1.24245	0.935146	0.568988	0.608448
Tnfsf9.3	GGTACCCAGGTTGGGCGAGG	0.788388	0.861059	0.716602	0.801715	0.715328	0.711088	1.14944	1.02277	0.628062	1.13321	0.915602	0.554233	0.605321
Ldlr.3	TGTGGTGGCTCTCGACACGG	0.867862	0.828921	0.856315	0.833729	0.855947	0.961121	1.05862	1.31112	0.837024	1.32201	1.04698	0.633147	0.604737
Cdk2ap1.1	CTCACCGGCGTTGAGGGCGG	0.359271	0.346101	0.448913	0.410756	0.381732	0.338213	0.314629	0.460375	0.246835	0.394692	1.03805	0.625387	0.602462
Gpd2.4	CCGCAGAGTTCCAATCCCCG	0.191383	0.156502	0.124951	0.13904	0.0776736	0.186886	0.168477	0.200758	0.148847	0.202931	1.22288	0.733486	0.599805
Cyth3.3	GGTGATGAAGCGCTCAGCGG	0.418007	0.273274	0.298519	0.219795	0.39619	0.27785	0.354498	0.212349	0.240034	0.262074	1.52963	0.915902	0.598775
Fas.1	AACAACCATAGGCGATTTCT	0.247694	0.245188	0.240542	0.220365	0.275202	0.222961	0.346871	0.398164	0.212674	0.351654	1.01022	0.604781	0.598662
Sema7a.2	TGAACATCGGCTCCACAAAG	0.120483	0.141929	0.116923	0.140337	0.126266	0.242843	0.162519	0.168193	0.0492162	0.0970224	0.848895	0.507267	0.597561
Ifngr1.3	GGCTCGGAGAGATTACCCGA	0.188023	0.187205	0.218654	0.101962	0.128026	0.163136	0.119865	0.112478	0.0659708	0.110084	1.00437	0.599278	0.596673
Cpsf2.1	CGGCGAATGGGAGGGCACCG	0.336321	0.375515	0.416435	0.321793	0.3912	0.292802	0.481057	0.444742	0.211045	0.394952	0.895624	0.534355	0.596629
Bcl2l11.2	GTTTGCAAATGATTACCGCG	0.248316	0.210836	0.270464	0.180548	0.348747	0.159686	0.192239	0.221641	0.155148	0.221148	1.17777	0.701557	0.595667
Fyn.2	GGGACCCTACGCACGAGAGG	0.1644	0.097588	0.172734	0.1746	0.0664819	0.0756734	0.149657	0.128472	0.0542166	0.0540486	1.68463	1.00311	0.595447
Fn1.4	GAGGGTGATGGAATTCCGCG	0.761947	0.652798	0.59734	0.608331	0.635652	0.724746	1.08231	0.895671	0.584176	0.842698	1.1672	0.693221	0.593917
Eno3.2	CAGCTGCTCGGAATCGACCT	0.0669645	0.0913266	0.117023	0.158759	0.128	0.110474	0.11405	0.0739048	0.034131	0.0784204	0.733242	0.435231	0.593571
Sema7a.1	CAAGCTCACCGTGCGCACAG	0.183946	0.145037	0.121672	0.131329	0.221548	0.163239	0.160739	0.137457	0.099967	0.132931	1.26827	0.752024	0.592953
Jak3.3	CCTGGGAAAGGACTACTACG	0.363457	0.337047	0.381757	0.39868	0.357862	0.430671	0.593638	0.501048	0.396778	0.621049	1.07835	0.638884	0.592461
Rbm39.3	AAGAATTCGACCGAGAGATT	0.0944204	0.15136	0.150304	0.178706	0.113032	0.173914	0.161859	0.163991	0.0687092	0.185926	0.623814	0.369552	0.592407
Tnf.2	TTACCTACGACGTGGGCTAC	0.631021	0.494772	0.525266	0.734157	0.668567	0.578589	0.894981	0.83274	0.642876	0.852604	1.27538	0.754015	0.591209
Prkcb.4	GTCAATCATGGAACACAATG	0.260319	0.454537	0.275495	0.32946	0.146411	0.371508	0.231841	0.246614	0.102109	0.301901	0.572713	0.338219	0.590557
Elf1.3	GTTCAGCGCGACGACACCTG	0.249745	0.242043	0.184504	0.258199	0.133103	0.306695	0.170507	0.242565	0.103318	0.169797	1.03182	0.608478	0.589714
Cr2.3	CACCTCCTGTTATACACAAC	0.0715054	0.104259	0.0712317	0.130952	0.0569491	0.141402	-	-	-	-	0.685842	0.402746	0.587228
Ypel2.1	GGAAATGAGTTCGTCGTGAT	0.276748	0.28987	0.201351	0.248713	0.297692	0.17458	0.188267	0.292929	0.120564	0.215212	0.954733	0.560208	0.586769
Traf6.1	CGCAGCAGTCACTGGACGAC	0.381682	0.298581	0.299214	0.25617	0.272987	0.180793	0.325769	0.298663	0.120763	0.161004	1.27832	0.750064	0.586757
Tgfbr2.1	GACCGCACCGCCATTGTCGC	0.857288	1.1842	0.791637	0.934085	0.740592	1.12851	0.793627	0.670974	0.299826	0.708208	0.72394	0.423358	0.584798
Bcl6.1	CACTAGCGTGCCGGGTAAAC	0.0575717	0.0518336	0.0562447	0.0439888	0.030744	0.0474115	-	-	-	-	1.1107	0.64845	0.583819
Irf8.1	CCGTTCCGGTCACACATCCT	0.0999573	0.159251	0.124562	0.149437	0.0818818	0.13163	0.123639	0.195814	0.0535506	0.146231	0.62767	0.366205	0.583436
Usf2.2	CCACAGGCGGGGACGGCCCG	0.778212	0.891346	0.774985	0.739572	0.650908	0.724627	0.788088	0.85749	0.377012	0.740707	0.873075	0.50899	0.582985
Lat2.2	GTAGAAGTTCTGGTACCTAG	0.119108	0.0950802	0.139523	0.125021	0.0754235	0.103284	-	-	-	-	1.25271	0.730254	0.58294
Atp7a.3	AAGAAGCAGATTGAAGCCGT	0.33529	0.330057	0.423381	0.374895	0.312804	0.373757	0.509808	0.519723	0.302805	0.511464	1.01585	0.592036	0.582796
Hdac7.1	TGACCCAGAGAGCCGCTCGG	0.930112	0.995291	0.812945	0.961171	0.714164	1.32942	-	-	-	-	0.934513	0.5372	0.574845
Myd88.4	GCATCCAACAAACTGCGAGT	0.500509	0.445179	0.355044	0.46147	0.540832	0.6814	0.424037	0.540791	0.340125	0.526353	1.12429	0.646192	0.574758
Cd68.1	ATCTTGCTAGGACCGCTTAT	0.078343	0.0976527	0.0951767	0.0744958	0.113869	0.0713215	0.0497191	0.059394	0.034131	0.074207	0.802261	0.459942	0.573308
Eif2ak2.3	TACCTTGGACGCCAGGTAAG	0.158117	0.137186	0.178178	0.121811	0.151539	0.0319722	0.0887868	0.0673537	0.0892693	0.135635	1.15257	0.658158	0.571033
Ripk2.4	TATTACAGCCAAGGAACACG	0.156089	0.264347	0.224224	0.257013	0.170107	0.196069	0.220413	0.141934	0.0720839	0.21399	0.590471	0.336857	0.570488
Gpr65.4	ATAAAGTCTACCGAGCTGTG	0.160404	0.196416	0.0953248	0.179388	0.0805594	0.132765	0.116099	0.0924472	0.0906322	0.195078	0.816655	0.464596	0.568901
Tox.2	GGACCCCTACTATTGCAACA	0.204088	0.209136	0.191325	0.213032	0.162995	0.104143	0.175257	0.22012	0.0678831	0.122397	0.97586	0.554613	0.568333
Gaa.4	GGCATTAACAGCAAGCGGCG	0.241125	0.240608	0.265243	0.283204	0.186079	0.138603	0.24358	0.186073	0.131048	0.230295	1.00215	0.569043	0.567824
Cd47.2	GATTCTCTTATTCGTATGGC	0.259229	0.240893	0.263589	0.291974	0.300505	0.289038	0.450257	0.466844	0.301973	0.494845	1.07611	0.610239	0.567076
Il22ra1.3	CGGCCAGGGATCCCACCGTC	0.550433	1.07134	0.540564	0.807167	0.466693	1.0429	0.641746	0.981961	0.282077	0.969368	0.513778	0.29099	0.566374
Rhoh.4	AGGACACGGAGTGAACTATG	0.259045	0.292338	0.310538	0.33381	0.325019	0.258681	0.442234	0.465761	0.208135	0.415141	0.886117	0.501359	0.565793
Rcn1.1	TGATGGCCTTGTTACTACTG	0.16342	0.156171	0.15411	0.097952	0.112246	0.110116	0.222632	0.0765128	0.0610831	0.103218	1.04642	0.591786	0.565536
Nrp.3	TGGCAGCCTCCGCCATAAAG	0.312401	0.251638	0.284193	0.205887	0.19017	0.19021	0.269535	0.242453	0.152313	0.217547	1.24147	0.700139	0.563958
Bcl2l1.1	GCTCTGATACGCGGTCCCTG	0.4789	0.474598	0.400427	0.49617	0.426003	0.483497	0.394447	0.569029	0.274374	0.482703	1.00906	0.568411	0.563306
E2f8.4	AAAGAGGATGATCACCGCGG	0.140219	0.13702	0.150693	0.257256	0.232439	0.11817	0.173692	0.177323	0.141358	0.245569	1.02334	0.575635	0.562503
Capzb.4	GCAAACCAACAAATCCGGCT	0.183779	0.186686	0.136795	0.168589	0.121509	0.186556	0.149622	0.213653	0.121869	0.220529	0.984429	0.552622	0.561363
Dgkz.4	GGTCAGTATGCACGACTACG	0.225153	0.090067	0.0893997	0.142283	0.144007	0.0722045	0.0834595	0.121022	0.165144	0.117765	2.49984	1.40231	0.560963
Plagl1.1	GCGCCCATTCAAGTGCTCGA	0.150331	0.228309	0.162837	0.151605	0.108993	0.13034	0.12786	0.140605	0.0831998	0.225361	0.658457	0.369185	0.560682
Fn1.1	AACCAGGGCGTTGCCTAGGT	0.631811	0.557	0.503272	0.565638	0.609777	0.611915	0.7656	0.91498	0.521151	0.819497	1.13431	0.63594	0.56064
Ripk2.2	GTATATATCATGCTTCACAC	0.293822	0.25522	0.229936	0.192282	0.160586	0.330297	0.189643	0.329731	0.0979542	0.151787	1.15125	0.645341	0.560556
Prkce.2	TCAGGGAGCGTATGCGGCCA	0.45232	0.502448	0.532269	0.49776	0.572746	0.712075	0.463036	0.335186	0.249359	0.495089	0.900231	0.503666	0.559485
Myb.2	GTATTTCCGAGCCGGACCGG	0.383096	0.315978	0.306146	0.324726	0.302988	0.274981	0.172387	0.381227	0.175624	0.260147	1.21242	0.675093	0.556816
Naip5.1	CCTCGTAGCTTTGAATATAC	0.172043	0.185138	0.19309	0.129445	0.149566	0.116843	0.0879494	0.101861	0.0413034	0.0801264	0.929265	0.515478	0.554715
Smpd1.3	GTGGCCATCCGGACCCCCGG	0.348168	0.318668	0.280488	0.296067	0.155807	0.352996	0.305349	0.290736	0.133621	0.220505	1.09257	0.605976	0.554633
Ctrl65.4	ACTTTATATAGGCCTTATTC	0.254413	0.22616	0.274489	0.274196	0.247021	0.24204	0.378936	0.395426	0.199741	0.320887	1.12493	0.622467	0.55334
Tox.4	AAATCCGCCCCCACAGCCCG	0.728192	0.673253	0.713088	0.836352	0.683957	0.610135	0.654612	0.886835	0.462704	0.775467	1.0816	0.596678	0.551661
Gas2.3	TCGGGCAAAAAAGGAGCCCG	0.0832015	0.161085	0.0876038	0.105033	0.0488622	0.134274	0.18187	0.159253	0.0279189	0.0981705	0.516506	0.284392	0.550607
Skap2.4	GGGATCCGACGTTATTCCTG	0.502752	0.281792	0.404947	0.420719	0.359087	0.366475	-	-	-	-	1.78412	0.97984	0.549201
Trim26.1	GGTGCTGCGGCCCCGGAGAG	0.423301	0.425549	0.297856	0.445455	0.223493	0.475245	0.262518	0.307693	0.24478	0.448805	0.994718	0.545403	0.5483
Bmpr2.1	CCTCGCTGCATCGGCCCTTT	0.183071	0.171869	0.0728752	0.169507	0.0987455	0.152258	0.109064	0.149603	0.0576259	0.0987929	1.06518	0.5833	0.54761
Atg12.2	TGCAGTTTCGCCCGGAACGG	0.594038	0.366811	0.467624	0.464885	0.528263	0.360986	0.640365	0.402108	0.438502	0.495887	1.61947	0.884279	0.54603
Swap70.2	GGACCGTCAGACCGTATCTA	0.31733	0.26076	0.278887	0.316699	0.299132	0.4503	-	-	-	-	1.21694	0.664294	0.545871
Acat1.2	CTGCCCAGGAAGGATCCAAT	0.134174	0.185233	0.218224	0.167865	0.0789899	0.151789	0.253593	0.136699	0.0653517	0.165364	0.724351	0.3952	0.545592
Lsp1.3	GGTACTGGCTACGGCCATGC	0.128318	0.154167	0.106159	0.185842	0.052243	0.203111	0.103084	0.204523	0.103318	0.228413	0.832335	0.45233	0.543446
Slc12a4.2	TCCCATGAGTGTGCCCATGC	0.17169	0.15885	0.0986361	0.133825	0.206427	0.147438	0.127139	0.134425	0.116734	0.199005	1.08083	0.586589	0.54272
Ptpn13.4	CGAAGCAAGGCCAAGCGGCG	0.0970838	0.0983705	0.206667	0.123316	0.216958	0.0967446	0.129415	0.0875839	0.0519388	0.097044	0.986919	0.535209	0.542303
Acat1.3	CAAAAAGTAAATATCCACGG	0.155332	0.144171	0.15343	0.151208	0.162289	0.0777868	0.119293	0.0838259	0.0761039	0.13063	1.07741	0.582591	0.540732
Tox.3	GCAGGCCATTGTGATTCATG	0.103898	0.159606	0.10738	0.126528	0.033172	0.163218	0.0749486	0.164287	0.0438462	0.124836	0.650966	0.351231	0.539554
Itgal.2	TGTGTCCAGGTTGTAGCTCC	0.628026	0.594182	0.666908	0.710466	0.596436	0.723698	0.930986	0.99614	0.474195	0.832446	1.05696	0.56964	0.538942
Hdac9.1	CCTGGACCGCACCTTCAAGT	0.422997	0.429697	0.422803	0.472552	0.291251	0.550366	-	-	-	-	0.984409	0.529196	0.537578
Cdkn1b.2	GGGCAGATACGAGTGGCAGG	0.245785	0.19865	0.248328	0.184176	0.240805	0.218091	0.118879	0.135447	0.162532	0.244936	1.23728	0.663569	0.536314
Hipk2.3	GCACCTCAGTCACCTGTGGG	0.192354	0.126319	0.210292	0.123673	0.143885	0.134873	0.125459	0.126654	0.116674	0.143008	1.52277	0.815855	0.535772
Il4ra.4	ACTCCTGGTAGCCACCGGCA	0.113879	0.19504	0.163613	0.187055	0.242713	0.144694	0.178139	0.0898803	0.109086	0.348961	0.583872	0.312602	0.535395
S100a6.2	CAGCTTCTAATACATTAAGA	0.0902368	0.0516203	0.13833	0.0568626	0.0459695	0.0857473	0.0938194	0.0523563	0.0485371	0.0520869	1.74809	0.931849	0.533068
Tcta.4	GCCCAGCGCTCCGAGCACCG	0.840233	0.757271	0.560642	0.647431	0.476384	0.722839	0.668278	0.780322	0.454414	0.770639	1.10955	0.589658	0.531437
Cxcr5.2	AACTTCTGCTCTACAGTCGA	0.20715	0.0660516	0.228308	0.145415	0.25047	0.150606	-	-	-	-	3.13618	1.66308	0.530288
Alcam.2	TGAAGCACCTACCCTAGTCA	0.252067	0.203722	0.211148	0.171673	0.252411	0.133856	0.207041	0.186424	0.141358	0.215618	1.23731	0.655596	0.529857
Hipk2.4	GGGGTACGATGATGGTGCGG	0.186694	0.270515	0.0909321	0.141664	0.183027	0.165882	0.246279	0.218598	0.0448985	0.124505	0.690142	0.360617	0.522526
Skil.4	GAATGCATGACGAACGTCTG	0.165747	0.190102	0.125154	0.200944	0.075675	0.152079	0.0852762	0.170865	0.0890569	0.195604	0.871885	0.455291	0.522192
Acvr1b.4	TATCGGCAAGGGCCGGTTCG	0.593965	0.492891	0.32007	0.552106	0.374097	0.300227	0.34759	0.460718	0.342896	0.545817	1.20506	0.628225	0.521321
Romo1.2	GCCGCAGATGCCGGTGGCCG	1.04989	1.02351	1.01038	0.982666	0.873618	0.951906	0.855415	1.02253	0.534277	0.999343	1.02577	0.534628	0.521196
Pfn1.3	GGGACGGCGGCCCAGACGGA	0.620934	0.54228	0.515927	0.47537	0.493648	0.390422	0.55833	0.399671	0.4011	0.672622	1.14504	0.596323	0.520786
Tnfrsf8.4	ACCTGGCAAACAGGTCACGC	0.234365	0.0871846	0.0972197	0.143568	0.181651	0.11894	0.104832	0.103967	0.135625	0.0971334	2.68814	1.39628	0.519421
Mgat5.2	TTTGCTCTCCAAGGTAAACG	0.429548	0.445399	0.395416	0.473445	0.451744	0.480547	0.522397	0.634249	0.322219	0.644431	0.964412	0.500006	0.518456
Socs5.2	CCTACTCGCGGCACGCCCCG	0.798394	0.537248	0.495994	0.493659	0.604792	0.709666	0.545168	0.844773	0.493495	0.641208	1.48608	0.769634	0.517895
Pde6d.3	GCTTCAAACTGTATCCGCCC	0.2714	0.215752	0.229921	0.152956	0.0785869	0.129613	0.257969	0.164009	0.137664	0.211887	1.25793	0.649708	0.516491
Ptprs.1	GGCGCGCTGGGAGCCCCCCG	0.176846	0.163914	0.208186	0.168832	0.218922	0.176081	0.206792	0.179579	0.0588671	0.105767	1.07889	0.556571	0.515872
Eno3.4	GAGACAAAGCACGATACCTG	0.177699	0.13069	0.139668	0.106543	0.166318	0.134846	0.0980741	0.194252	0.0649842	0.0927479	1.35969	0.700654	0.515302
Flt3l.2	CAAATGTGCGTATACCTGAG	0.114836	0.11587	0.150815	0.189541	0.189231	0.214318	0.151942	0.223562	0.0690169	0.135185	0.991076	0.510538	0.515135
Plagl1.4	GAGCTGCCAAAACCCCAATA	0.289251	0.232234	0.194526	0.167055	0.235619	0.153442	0.194199	0.236389	0.136216	0.212325	1.24552	0.641545	0.515084
Slc29a1.4	TAAGAGTGTACGTGGGCCCG	0.201383	0.139622	0.158694	0.106408	0.165463	0.134468	0.211101	0.104316	0.0962515	0.129802	1.44235	0.741526	0.514112
Bcl2l11.4	AGGTAATCCCGACGGCGAAG	0.0389097	0.0425908	0.0516573	0.0375792	0.030103	0.0565646	0.0618531	0.0305291	0.0300358	0.0642003	0.913572	0.467845	0.512105
Rcn1.2	GAACTATCATGGAATTCAGC	0.229653	0.199318	0.296893	0.463981	0.0993984	0.211246	0.26069	0.244086	0.143256	0.242825	1.15219	0.589956	0.512029
Ddb2.1	TACTCCGTGAAGGGATCTGC	0.0927944	0.120933	0.0901628	0.15026	0.0496465	0.151118	0.0829105	0.1204	0.0402596	0.102532	0.76732	0.392653	0.51172
Ms4a1.1	GCGTTTGAAAACTCAATGAG	0.138418	0.0814126	0.190995	0.133997	0.129417	0.149068	-	-	-	-	1.70021	0.868176	0.51063
Cxcr5.4	CTTACTGACGTCCTTTAAGG	0.134428	0.233924	0.124112	0.237408	0.0586782	0.200154	-	-	-	-	0.574663	0.293165	0.510151
Cdk2ap1.3	GCTCTCACTCACCGGCGTTG	0.119416	0.0613279	0.115967	0.0672453	0.0856266	0.0899036	0.116993	0.0932419	0.0628068	0.063249	1.94717	0.993009	0.509975
Mdk.1	CTGCGGCATGGGCTTCCGCG	0.811083	0.94372	0.817344	0.979699	0.694677	0.962645	0.874401	1.10277	0.575522	1.31645	0.859453	0.437178	0.50867
Aoc2.4	CTTTATGCTACACCCAACCG	0.061986	0.0631562	0.0519373	0.083556	0.0992517	0.0961142	0.111488	0.0744205	0.0294223	0.0589694	0.981472	0.498942	0.508361
Rps6ka4.4	GCTGAGGTTCGAGTGTATGG	0.243705	0.471394	0.422725	0.429183	0.325184	0.525352	0.274409	0.514502	0.162064	0.616682	0.516987	0.2628	0.50833
Cap1.1	GGAGAGCTCGCTCCAACTTC	0.134885	0.196971	0.159907	0.172859	0.234982	0.117839	0.118789	0.16648	0.0981151	0.282505	0.684796	0.347304	0.507165
Cdkn1b.3	TGTCAGCGGGAGCCGCCAGG	0.806582	0.73065	0.762637	0.803469	0.838852	0.792839	0.698056	0.655507	0.451462	0.809906	1.10392	0.557426	0.504949
Bdh1.4	CTGACTGGCGTAGGTCCGAC	0.200477	0.170617	0.257665	0.166378	0.203986	0.142285	0.185239	0.142705	0.12021	0.202931	1.17501	0.592371	0.504141
Mxi1.1	AGCACTCGAAGCCCCCACGG	0.289446	0.410716	0.312112	0.437065	0.266238	0.326581	0.4132	0.395968	0.143082	0.403356	0.704734	0.354729	0.503351
Ptpn13.3	GCCATTCGAGACCGACTGAG	0.0902565	0.0584135	0.0900869	0.0584442	0.0457517	0.0894651	0.164557	0.114239	0.094716	0.121913	1.54513	0.776918	0.502817
Bcl2l11.3	GAACCGCAAGGTAATCCCGA	0.0822101	0.0291715	0.0545068	0.0896627	0.122265	0.071071	0.0319562	0.0472983	0.0549271	0.0388515	2.81817	1.41377	0.501664
Ccnd3.3	CACTGGAAGTAGGAGGCTCG	0.649877	0.528017	0.581717	0.514605	0.649504	0.564742	0.861432	0.781734	0.572794	0.93212	1.23079	0.614507	0.499279
Eno3.3	CTGCACAGGACAGGTACTCG	0.249826	0.269415	0.240952	0.304574	0.228192	0.291999	0.141839	0.424214	0.16908	0.365281	0.92729	0.462877	0.499172
Havcr1.1	TGTACTTACTCAACATATCG	0.350722	0.295711	0.314313	0.32887	0.304152	0.279421	0.373426	0.364365	0.272856	0.461029	1.18603	0.591841	0.499011
Pde6d.2	TCAGAGTGGTTCTTCGAGTT	0.145426	0.116928	0.0819605	0.113952	0.0729526	0.1636	0.0544377	0.0918635	0.0689102	0.111445	1.24373	0.618332	0.497161
Romo1.1	ACTCTCGCCGCAGATGCCGG	0.254183	0.207068	0.195862	0.235146	0.200192	0.349995	0.222441	0.253752	0.137418	0.226239	1.22754	0.607403	0.494815
Aes.3	GCAAAGCCGGCACTCGGTAA	0.126012	0.107314	0.0825756	0.0741345	0.141135	0.0682092	0.0816185	0.0675136	0.0917879	0.158406	1.17424	0.579446	0.493466
Btla.2	GCCCTCAGCTATACACTAGT	0.289049	0.230592	0.238108	0.279768	0.245118	0.266518	0.332701	0.396795	0.176671	0.286073	1.25351	0.617575	0.492676
Pon2.2	GTCCCGCACCATGGGCCGGA	0.710473	0.553974	0.496953	0.564613	0.487186	0.636054	0.443181	0.641209	0.358193	0.568346	1.2825	0.630238	0.491413
Isg20.1	TGACAAGTACATCCGACCCG	0.247609	0.319132	0.340946	0.47251	0.231709	0.362153	0.349216	0.335165	0.124155	0.326217	0.775882	0.380589	0.490525
Slc12a4.1	ATAGTAGTCATTTCCTCTGG	0.143636	0.169586	0.131256	0.186514	0.129688	0.2115	0.0951634	0.180937	0.0502431	0.121011	0.846976	0.415193	0.490206
Pml.2	GTGTTGCACATGCGCGCTCC	0.642305	0.848108	0.615543	0.819879	0.648918	1.07364	0.45389	0.851301	0.268755	0.724472	0.757338	0.370966	0.489829
Cyth3.4	CATCAAGGCCTGCAAGACGG	0.0937287	0.0957177	0.215629	0.164957	0.180541	0.151685	0.0728917	0.0624057	0.0620681	0.129507	0.97922	0.479263	0.489434
Acat1.4	GGCAGCCATGGAGACGCGAA	0.226808	0.225142	0.244901	0.251406	0.286311	0.302756	0.253005	0.315795	0.128025	0.25972	1.0074	0.492933	0.489312
Aip.1	CAGCGTCCGAAAGTGGAACG	0.791379	0.609291	0.596774	0.564173	0.420826	0.662869	-	-	-	-	1.29885	0.634855	0.488782
Gnpat.3	CTATGCGGTAGGCGCCTGGG	0.315779	0.345766	0.275756	0.385116	0.227469	0.446854	0.254313	0.357451	0.153345	0.344076	0.913276	0.445672	0.487993
Cd81.2	GGGCTTCGTAAACAAAGACC	0.216109	0.190298	0.202212	0.277834	0.117794	0.212591	-	-	-	-	1.13563	0.554088	0.487912
Vav2.1	TCTTTGATGTCCGAGACTTC	0.400012	0.222923	0.451812	0.222592	0.331799	0.380364	-	-	-	-	1.79439	0.872321	0.486137
Camk1d.4	CATCCCGAAGAAGGCGCTGA	0.127309	0.141711	0.0708434	0.12391	0.087453	0.12863	0.0455859	0.0534087	0.0374233	0.0857371	0.898376	0.436489	0.485864
Ifngr2.4	CTGCGGGTGCGAGCCAAGCG	0.684458	0.571285	0.699676	0.829306	0.572826	0.858904	0.607691	0.845138	0.562268	0.966904	1.1981	0.581514	0.485363
Gas2.4	GAGAGGCGGCTCCCCGCGCG	0.914474	0.717397	0.644001	0.754531	0.619505	0.875374	0.670056	0.612348	0.440271	0.71224	1.27471	0.618149	0.484933
Cd274.3	GGACCGTGGACACTACAATG	0.521135	0.490041	0.633379	0.622654	0.435378	0.559299	0.905067	0.701797	0.336611	0.655185	1.06345	0.513764	0.483111
Fcrl1.2	CTGGGAATATAACTTACTTC	0.0685264	0.13069	0.0694005	0.0768806	0.0341321	0.0633742	0.0417522	0.112877	0.0315341	0.124504	0.524341	0.253278	0.483039
Prkd2.1	AGAGCAGGATCTTGTCGTAC	0.232349	0.295559	0.286317	0.108069	0.21176	0.160298	0.16621	0.243315	0.0698219	0.183919	0.786132	0.379634	0.482914
Il9r.2	CCTGGTTCCTGATCTACAGC	0.240224	0.169789	0.273623	0.236705	0.133695	0.256053	0.146244	0.218297	0.117715	0.173471	1.41484	0.67859	0.479624
Mxi1.2	GCGCAAGGAGGCGCGCTGCG	0.306207	0.221619	0.26725	0.308199	0.223481	0.371831	0.178616	0.248102	0.180114	0.273174	1.38168	0.65934	0.477201
Ms4a1.3	GGACCTTTTGTAGGCTCTGC	0.460007	0.399813	0.442135	0.379632	0.266478	0.486372	-	-	-	-	1.15056	0.547889	0.476195
Traf6.4	ATCCCGGGGATGTCGTCCAG	0.577308	0.379374	0.489714	0.247859	0.255745	0.349731	0.327556	0.164212	0.200085	0.277596	1.52174	0.720777	0.473653
Prkcz.1	TACGGTGAGTGTGAGCCACG	0.154728	0.12927	0.119308	0.115554	0.198032	0.266446	0.109971	0.13655	0.0663682	0.11784	1.19694	0.563207	0.47054
Cklf.3	TTCCTAGTCTTATACACGTG	0.127048	0.0523444	0.090118	0.0470318	0.0436847	0.0614893	0.0758072	0.0794599	0.069689	0.0610563	2.42715	1.14139	0.470259
Il6st.1	TTCGAGCCGCGCTGGACAAC	0.877224	0.685216	0.541668	0.62794	0.463654	0.5676	0.561671	0.444942	0.312548	0.519776	1.28021	0.601313	0.469697
Tcta.1	CAGCGCTCCGAGCACCGTGG	0.612971	0.483493	0.569901	0.49697	0.478338	0.479896	0.520397	0.46268	0.327961	0.551487	1.2678	0.594685	0.469069
Marcks.2	GGCGCCCGCTGCCACCGACG	0.640567	0.636006	0.805424	0.624827	0.543189	0.552093	1.00847	0.584544	0.367832	0.779443	1.00717	0.471916	0.468556
H3f3b.1	GAAAGCCCCCCGCAAACAGC	0.111247	0.118716	0.0997209	0.0871032	0.0236536	0.0956802	0.133719	0.116768	0.0541963	0.12362	0.937083	0.438409	0.467844
Bdh1.1	GGGATGGTAGCGGGTATACG	0.219518	0.264016	0.211718	0.296573	0.339158	0.308722	0.156539	0.24776	0.105363	0.270861	0.83146	0.388992	0.467842
Gas2.2	CGCTGGAGTCCGGGGACGCG	0.81967	0.968892	0.852408	1.07135	0.769625	0.971261	0.955227	0.780451	0.366424	0.928728	0.845986	0.394544	0.466371
Pacsin1.4	ACATCCCAGGCTGGGGACCG	0.296154	0.326873	0.321122	0.413863	0.376447	0.443686	0.305972	0.328653	0.131508	0.311464	0.906023	0.422226	0.466021
Il6st.3	GTATTCGCCACGGGGCCCGG	0.892098	0.998398	1.0829	0.827148	0.751874	1.35352	0.873826	1.1807	0.400704	0.962536	0.89353	0.4163	0.465905
Bag6.2	AAATCCGGATGACCCGTGGG	0.416897	0.477787	0.423515	0.40522	0.286809	0.325688	0.285853	0.422875	0.162591	0.400453	0.872559	0.406017	0.465317
Gdi1.3	GGACCGAAACCCCTACTATG	0.214017	0.197576	0.183959	0.214905	0.124547	0.153361	0.266188	0.231953	0.125655	0.250076	1.08321	0.502468	0.463868
Flt3l.1	CTGCTGAGTCCTTGCCTGCG	0.287045	0.22515	0.246149	0.197829	0.348067	0.231175	0.283479	0.174059	0.135424	0.229604	1.2749	0.589815	0.462635
Marcks.4	CGCCGGCGCGGCCGACAAGG	0.862983	0.988028	0.847343	0.968303	0.710139	1.01225	0.937734	1.04116	0.418381	1.03564	0.87344	0.403982	0.462518
Slc29a1.2	TCGGACGGTGAGCAAATGGG	0.125046	0.13562	0.106984	0.189689	0.145903	0.225204	0.0819195	0.201272	0.114518	0.268811	0.922035	0.426015	0.462038
Crlf2.2	GCTGCTAGGCCGCAGCCCAG	0.172983	0.0934501	0.181984	0.102619	0.101024	0.0766636	0.185485	0.104438	0.0218436	0.0255602	1.85108	0.854593	0.461674
Ttc39b.2	GCCGCTCTTGAGATCCACCT	0.113015	0.0968614	0.116648	0.109545	0.0848028	0.0648995	0.101444	0.0881667	0.0530645	0.0986703	1.16677	0.537796	0.460926
Rps6ka5.3	CCTGGATTCTAACGGCCATG	0.257172	0.134255	0.216933	0.201464	0.351656	0.151135	0.28237	0.180152	0.235054	0.266912	1.91555	0.880643	0.459733
Tgfbr2.2	GATTACATCATCTTTTCGGA	0.179655	0.0988537	0.264498	0.096191	0.167274	0.111641	0.163315	0.109475	0.197806	0.237111	1.81738	0.834235	0.459032
Tank.1	AGTGTGTATTAAGATGCCGG	0.256439	0.178923	0.2107	0.133394	0.139078	0.168686	0.249827	0.182078	0.0824922	0.126084	1.43323	0.654264	0.456495
Irf4.2	TTTAAAGGCAAGTTCCGAGA	0.161377	0.182275	0.111571	0.100871	0.0949856	0.123225	0.0887795	0.133501	0.058565	0.145362	0.88535	0.402892	0.455065
Aldh4a1.3	GTTCAACGCAAAGTTCGCCG	0.207247	0.166392	0.140719	0.183088	0.121916	0.208923	0.121928	0.180747	0.116734	0.206294	1.24554	0.565862	0.454311
Lta.3	GATGGGAGATGCCGTCGGTG	0.157466	0.224998	0.192237	0.169461	0.18868	0.137468	0.184372	0.210774	0.0630246	0.198501	0.699852	0.317503	0.453672
Skil.2	GCTGGAGTGAAAATTCTCGG	0.330454	0.300032	0.278622	0.27551	0.24043	0.231512	0.326218	0.262543	0.113052	0.226678	1.10139	0.498734	0.452821
Lta.4	GACTTCTGCGCACTGAGGAG	0.143192	0.164171	0.109985	0.154252	0.162595	0.191796	0.140715	0.205284	0.0534496	0.135564	0.872211	0.394276	0.452042
Il10rb.2	AGAGAAGTCGCACTGAGTCG	0.469886	0.43257	0.215422	0.324832	0.371005	0.394969	0.339244	0.332598	0.155145	0.317701	1.08627	0.488336	0.449555
Tnfrsf1b.1	TACCCAGGTTCCGGTTTGTA	0.352279	0.297556	0.271294	0.284923	0.269729	0.277986	0.425881	0.387761	0.211245	0.398157	1.18391	0.530558	0.44814
Atg12.1	CTCTCGCCGCCGGCTCCTAC	0.316734	0.22821	0.315503	0.249667	0.381183	0.340447	0.275212	0.26427	0.208032	0.334545	1.3879	0.621836	0.44804
Cklf.1	GTCCACACGTGTATAAGACT	0.226817	0.309231	0.157242	0.278844	0.239166	0.448608	0.162337	0.241337	0.0991732	0.302698	0.733487	0.327631	0.446676
Ddb2.4	CCTGAGGAGCACCGCAACGT	0.13258	0.127884	0.196685	0.136432	0.083847	0.0938438	0.104815	0.158017	0.0526679	0.114497	1.03672	0.459993	0.443699
Endod1.3	CGGGCGCGCAGCGCGAAACG	1.25699	1.1192	1.13118	1.12639	0.746016	1.04748	1.11661	1.00333	0.586214	1.17863	1.12311	0.497368	0.442848
Nrip1.3	AGTACTGCAGGCATACGGCG	0.208636	0.143805	0.120438	0.135907	0.121607	0.0796702	0.147356	0.152371	0.0974939	0.152068	1.45083	0.641121	0.441901
Cap1.4	ACCACAGTGACAGAAATCGC	0.164848	0.209412	0.253527	0.142993	0.208228	0.164065	0.129939	0.224685	0.0906414	0.260911	0.787191	0.347403	0.44132
Ctrl66.3	TCAAGGTGGGCGGTTGATTC	0.202808	0.255438	0.17287	0.132382	0.136542	0.191896	0.163314	0.110347	0.0519218	0.148204	0.79396	0.35034	0.441256
E2f8.1	TAAACGGACAACCAGTCGCG	0.0741864	0.0812753	0.181049	0.0853672	0.109772	0.092141	0.112155	0.0281902	0.0295755	0.0735475	0.912779	0.402127	0.440553
Psmb9.1	GTCCGGAACGAGCCGGCGGT	1.10676	0.797999	1.01266	0.643554	0.796584	0.988027	1.12618	0.898553	0.502072	0.822997	1.38692	0.610053	0.439862
Inpp5b.3	GACGGAGACCGCTCGCCGGG	0.565306	0.425918	0.522645	0.493481	0.3711	0.420054	0.52734	0.433873	0.248861	0.427968	1.32727	0.581494	0.438114
Ptprs.4	GTCGGTGCAGCAGACCCCCG	0.426684	0.510581	0.259524	0.412851	0.329637	0.421966	0.342858	0.47522	0.159265	0.435428	0.835683	0.365768	0.437687
Irak4.4	TCTGGGCTTGAGGAGTCCGG	0.367072	0.550973	0.450716	0.549323	0.396087	0.64179	0.578803	0.54888	0.139851	0.481556	0.666225	0.290415	0.435911
Nrip1.2	CGTGGGATCTTACTGACGAG	0.119772	0.101255	0.126083	0.135706	0.171251	0.0962248	0.101188	0.193378	0.0571433	0.111175	1.18287	0.513995	0.434532
Bank1.2	CCAGGAAGCACTAGTACCCG	0.441231	0.213151	0.227836	0.302963	0.272829	0.30404	-	-	-	-	2.07004	0.897345	0.433491
Cd68.3	GGGTACCGTCACAACCTCCC	0.144297	0.164775	0.124194	0.125983	0.0918226	0.118575	0.236762	0.124111	0.0442773	0.117717	0.875724	0.376134	0.429512
Ptpn2.1	CACTCTATGAGGATAGTCAT	0.117609	0.0825853	0.15012	0.0966819	0.109302	0.126113	0.144219	0.112272	0.0435999	0.0715268	1.4241	0.609561	0.428034
Car2.4	GTCATCAAACTCAACGTTAA	0.242449	0.187068	0.20408	0.130638	0.190811	0.234532	0.336646	0.111635	0.0970798	0.17628	1.29605	0.550712	0.424916
Usf2.3	GGTGACATACCGCGTAGTCC	0.0778325	0.199318	0.103931	0.123456	0.0812356	0.161117	0.141559	0.141629	0.0306541	0.1858	0.390493	0.164984	0.422502
Cd68.2	GTAGGTGTCATCGTGAAGGA	0.18739	0.143774	0.251298	0.236045	0.18391	0.232355	0.231433	0.211066	0.0944897	0.173625	1.30336	0.544216	0.417549
Capzb.3	GTACCTGCACTTCCACCACG	0.111415	0.0821029	0.095516	0.0873594	0.0901404	0.0785086	0.11735	0.078605	0.0535954	0.0952738	1.35702	0.562541	0.414543
Lta.1	TGCCAAGCACCCTCAAGAGG	0.0664441	0.057343	0.0999003	0.0797322	0.05958	0.0724328	0.0397143	0.0777464	0.0381242	0.0794066	1.15871	0.480114	0.414351
Vmp1.3	GCAGAGACGGACCTATGCCG	0.148577	0.135974	0.164462	0.0720349	0.195026	0.0776459	0.175999	0.0701762	0.0347352	0.0769777	1.09269	0.451237	0.41296
Flot2.3	GCCCATGCGGCCAACATCGG	0.3895	0.237403	0.377309	0.34112	0.186232	0.244556	0.279902	0.261586	0.182118	0.2692	1.64067	0.676513	0.41234
Vps37a.3	GAAGAGCGCGTCATCCTCCG	0.231849	0.200322	0.256261	0.245864	0.226461	0.205859	0.0958282	0.242565	0.104741	0.220094	1.15738	0.475893	0.411181
Tbc1d22a.1	CGGATCAAACGGTGGGTGCT	0.212229	0.152999	0.0934877	0.135879	0.187418	0.106493	0.209459	0.118694	0.0562873	0.0987591	1.38712	0.569945	0.410883
Pik3cg.3	TGGCCGCGATGAGTACCTGG	0.885624	0.574514	0.469578	0.508663	0.430249	0.543966	0.618906	0.474945	0.297216	0.473086	1.54152	0.628248	0.407552
Ski.4	GGGCGGCTTCCAGCCGCACC	0.102604	0.0952116	0.165853	0.0991263	0.0877559	0.132735	0.151308	0.0607	0.0517353	0.117968	1.07765	0.438554	0.406955
Alcam.3	CACCAGCAACGAGGGCAGCG	0.185835	0.246516	0.151683	0.250481	0.210372	0.218555	0.189445	0.211751	0.0772895	0.25243	0.753845	0.306182	0.406161
Dgka.3	CACACCAATATCCGGAACTG	0.140217	0.205137	0.103268	0.202958	0.108457	0.213537	0.103368	0.171831	0.0633276	0.228954	0.683532	0.276596	0.404657
Pik3cg.1	GCTCCATGCCCTATGCGACC	0.198067	0.29447	0.0822687	0.162433	0.202305	0.181636	0.11114	0.191148	0.0417309	0.153604	0.672622	0.271679	0.40391
Pbx3.2	CACGGCCACGAAGGGGCGGA	0.410065	0.330909	0.36709	0.374006	0.337096	0.319614	0.278664	0.396726	0.177454	0.356448	1.23921	0.49784	0.401741
Pycard.2	GGCTATGGGCGCATCCCACG	1.53997	1.09723	1.25194	1.07856	0.880589	1.03695	1.16852	1.35439	0.675293	1.20414	1.40351	0.560811	0.399577
Il16.4	GGAGTAGGGCTGCCGGTCGG	0.786134	0.833173	0.963203	0.631777	0.844042	0.727694	0.9367	0.806882	0.489561	1.30044	0.943542	0.376458	0.398984
Cst3.2	TCCAGGGCACGCTGTAGATC	0.161699	0.121587	0.177517	0.129925	0.169239	0.120211	0.101659	0.179344	0.0703178	0.132931	1.3299	0.528981	0.39776
Ctrl66.4	CTTCTGCGGTCGCATTAACG	0.16461	0.170588	0.0955811	0.11114	0.142909	0.121524	0.130945	0.173058	0.0550449	0.143727	0.964957	0.382981	0.396889
Ctrl1.2	GGTATTTATGCAATCTACCT	0.0928813	0.0374181	0.138571	0.103962	0.113982	0.115971	-	-	-	-	2.48225	0.982856	0.395953
Flot2.4	TTGAAAGGTCCACACCGGTG	0.131428	0.140034	0.104973	0.139672	0.0793395	0.119578	0.19921	0.119301	0.0716937	0.193761	0.938543	0.370011	0.39424
Acvr2a.3	TGTGAGAGATTGCAGGCTTG	0.20557	0.136363	0.207676	0.114293	0.16229	0.149396	0.2003	0.117189	0.134272	0.22603	1.50753	0.594048	0.394055
Nedd1.4	GAGAAAATAGTCGATACCCT	0.1206	0.16511	0.17713	0.101765	0.055189	0.15537	0.173547	0.190145	0.0452069	0.158658	0.730418	0.284933	0.390095
Nedd1.2	GATGCGCTTACCTGTAGTTG	0.267229	0.225589	0.302734	0.165408	0.209772	0.209635	0.286065	0.239426	0.0987907	0.214759	1.18458	0.460006	0.388328
Elf1.4	TTGCAATGGAGCGGGCAGTG	0.304422	0.247601	0.266021	0.292763	0.260364	0.307587	0.172532	0.319677	0.156716	0.328821	1.22949	0.476599	0.387641
Aes.4	GCCCGACAGGCAGCGGTGTC	0.349936	0.302348	0.410314	0.307393	0.25967	0.328952	0.236055	0.270124	0.119616	0.269923	1.15739	0.44315	0.382886
Tmbim1.2	GTCCTGGAGAATGGGATGAC	0.192433	0.211068	0.181793	0.162702	0.210571	0.140712	0.231198	0.234956	0.0782924	0.224834	0.911714	0.348222	0.381943
Cblb.1	GGCAGAAATCCTGGTGGTCG	0.120305	0.158814	0.122025	0.168796	0.191411	0.131819	0.120705	0.0895286	0.0425089	0.147971	0.75752	0.287279	0.379236
Cpsf2.3	TAACTTATAGGACAACTCCG	0.179217	0.12538	0.239298	0.170093	0.313321	0.13909	0.128003	0.214604	0.104422	0.194024	1.42939	0.538189	0.376517
Cst3.4	CCACCTGTATGGCGCGGCTG	0.113742	0.0990692	0.124194	0.0729831	0.155422	0.120701	0.0630588	0.133296	0.0652883	0.151627	1.14811	0.430584	0.375037
Lclat1.2	ACAGGTGACGCCTTTGTGCC	0.102293	0.0869678	0.0747328	0.101683	0.0642704	0.0980603	0.0576559	0.0910491	0.043557	0.0989306	1.17622	0.440279	0.374317
Bcl2l11.1	TCGCCGTCGGGATTACCTTG	0.189727	0.0866665	0.168263	0.104496	0.10812	0.0593298	0.275958	0.152569	0.0923172	0.113619	2.18917	0.812512	0.371151
Cdkn2c.4	GTTCCGATGCCCCACATTGC	0.0971282	0.14293	0.074617	0.177204	0.089887	0.125761	0.119999	0.23314	0.0695893	0.277147	0.679551	0.251092	0.369496
Cd86.1	GGTTCTGTACGAGCACTATT	0.129301	0.0601795	0.190048	0.160609	0.0957657	0.121262	-	-	-	-	2.1486	0.789741	0.367561
Mdh2.2	GGTGGCCACAATGGTAGCGT	0.0785731	0.19088	0.131633	0.164974	0.0473051	0.163198	0.119293	0.0781138	0.025227	0.167052	0.411636	0.151013	0.36686
Socs4.1	CTTCGACTCCGACTTGTTTT	0.232627	0.0747794	0.168525	0.0985539	0.17963	0.220923	0.188576	0.180775	0.16838	0.148294	3.11084	1.13545	0.364997
Spp1.1	GCAGAATCTCCTTGCGCCAC	0.095753	0.0918122	0.129527	0.110252	0.0645306	0.191999	0.0897383	0.132909	0.0407571	0.107387	1.04292	0.379535	0.363915
Gaa.2	GGACGACGGGGAGAGCCTCG	0.438172	0.43777	0.427751	0.464663	0.443636	0.43091	0.507476	0.331402	0.121307	0.333206	1.00092	0.36406	0.363726
Usf2.4	TGCCCCCGCAGCCACGACAA	0.370461	0.343149	0.470426	0.327359	0.309387	0.336467	0.460647	0.336199	0.145327	0.370559	1.07959	0.392183	0.363269
Rnf11.3	CGACCGGGCTAGCTTTGGCG	0.141356	0.142512	0.131927	0.14725	0.162645	0.165003	0.134494	0.149553	0.0528381	0.147351	0.991892	0.358586	0.361517
Gdi1.4	GATCTCCTATGCGCACAACG	0.192842	0.136373	0.149958	0.118259	0.141707	0.105118	0.186499	0.133589	0.0517353	0.10133	1.41407	0.51056	0.361057
Vps37a.1	ATACGTACATTGCTTACTAA	0.159849	0.15762	0.17211	0.212323	0.1341	0.141964	0.112859	0.135058	0.0825062	0.225674	1.01414	0.365598	0.360501
Nrip1.4	GATGCATTAGTAACCCTTCG	0.153924	0.171482	0.18244	0.182973	0.0520139	0.179159	0.0992794	0.105428	0.0333705	0.103909	0.897611	0.321152	0.357786
Acvr2a.2	ATATGCCAATCCTCTAGCCA	0.125923	0.192707	0.12962	0.110819	0.114655	0.143541	0.171787	0.0808941	0.0352097	0.151334	0.653445	0.232662	0.356055
Sema7a.4	GGAGCCCGAACCGAGCCGGC	0.729408	0.672644	0.736639	0.588349	0.710307	0.83065	0.850472	0.642193	0.301456	0.781015	1.08439	0.38598	0.355943
Il4ra.1	TGCAGTCCACAGCGCTATCC	0.195089	0.263055	0.0818099	0.199841	0.110964	0.148378	0.0576899	0.201261	0.044808	0.170334	0.741628	0.26306	0.354707
Prkce.4	ACAATTCTCGGCTTGAAGGG	0.24246	0.216878	0.275806	0.231235	0.155764	0.144974	0.17897	0.236139	0.0680103	0.17256	1.11795	0.394126	0.352542
Myb.3	GAAAGCAGTGTCGGGAGAGG	0.320976	0.143386	0.305018	0.215706	0.157432	0.228895	0.248939	0.16094	0.125973	0.159711	2.23855	0.788756	0.352352
Cd83.4	GCGCAACTTGAGCGGCACCG	0.481641	0.519747	0.497949	0.466243	0.233434	0.516709	0.305084	0.543201	0.122868	0.376304	0.926685	0.326514	0.352346
Mxi1.4	CCTCCATGGGCAAACGCGGG	0.168489	0.145911	0.126168	0.116854	0.136014	0.146138	0.0790085	0.143901	0.0494611	0.121989	1.15474	0.405454	0.351121
Fyn.3	ACTGGGACCCTACGCACGAG	0.13233	0.0876358	0.06229	0.0723463	0.116663	0.0436129	0.0809395	0.0684933	0.0608751	0.115233	1.51	0.528276	0.349852
Tnfrsf8.1	TGGTCTTGAGTGGTCGATCC	0.19697	0.12686	0.206499	0.157609	0.219143	0.122543	0.153197	0.172681	0.150718	0.278041	1.55266	0.542071	0.349124
Usf2.1	GTGCCCCCGCAGCCACGACA	0.772282	0.857549	0.953642	0.744465	0.683118	0.818467	0.928074	0.818577	0.228563	0.728796	0.90057	0.313617	0.348243
Ltb.4	GCACGGCTTCGGCCGGCAGG	0.705267	0.614237	0.716703	0.61409	0.534097	0.628532	0.511246	0.551946	0.266942	0.670736	1.1482	0.397984	0.346615
Mdh2.3	TTGGGGAAAGTCAACCTTCG	0.138928	0.100723	0.116002	0.127182	0.0569269	0.149109	0.0662347	0.0538779	0.0435999	0.0914434	1.3793	0.476797	0.345679
Tbc1d4.4	TCACAGGAGATGCAACCCGG	0.200765	0.134916	0.21135	0.127504	0.127337	0.170086	0.204141	0.133856	0.0610831	0.118837	1.48807	0.514006	0.345418
Ski.2	CACCTGTCTCGAATCAAAGC	0.16818	0.223903	0.169795	0.15465	0.172249	0.219144	0.222226	0.156247	0.050688	0.197354	0.75113	0.256837	0.341934
Ier5.1	GTTTAGAGTCCGGCTCAGAA	0.123559	0.0888013	0.0894425	0.070643	0.177856	0.0520844	0.0415992	0.180806	0.0709328	0.149275	1.39141	0.475182	0.341512
Myd88.3	CCACCATGCGGCGACACCTG	0.481361	0.392979	0.492978	0.516888	0.456791	0.507006	0.455128	0.490135	0.270507	0.647704	1.2249	0.41764	0.340957
Pold4.4	CCTGACCTGCATTGGAAGTG	0.105903	0.0792831	0.143194	0.0616074	0.123449	0.0646586	0.143822	0.154347	0.0724398	0.159527	1.33576	0.45409	0.339949
Rabgap1l.4	CCCAGGACATGCACGACGAG	0.150777	0.118516	0.224627	0.128847	0.208401	0.0863839	0.0941041	0.0969222	0.0493104	0.114366	1.2722	0.431163	0.33891
Bmpr2.2	ATCCCAAGATCTTGTTGATA	0.0701216	0.102112	0.0413057	0.070913	0.033936	0.0976234	0.0507246	0.0354163	0.0164976	0.0711943	0.686715	0.231727	0.337442
Nfatc1.2	CAGGGTCGAGGTGACACTAG	0.0736603	0.0913442	0.121797	0.0587885	0.0662663	0.116758	0.0443246	0.126066	0.0335969	0.123511	0.806404	0.272015	0.337318
Aimp1.2	ACGCGATGCGTCGATAGGCT	0.175223	0.132694	0.140818	0.13727	0.17963	0.208644	0.126787	0.0581232	0.0484863	0.109083	1.3205	0.444491	0.336608
Vmp1.2	GACCTGGCTGGAATAACGTG	0.329551	0.228468	0.244945	0.258416	0.207965	0.285979	0.302911	0.372306	0.12462	0.257546	1.44244	0.483874	0.335456
Bmpr2.3	TCCATTCTGAATTGAGGGTG	0.269848	0.132147	0.0891131	0.081234	0.253912	0.205524	0.0815342	0.195464	0.0821324	0.120411	2.04203	0.682099	0.334029
Rabgap1l.1	CAGATGACCCACTAACCTTC	0.100419	0.2117	0.0527309	0.183763	0.0843167	0.162155	0.0785595	0.216582	0.0336422	0.212901	0.474347	0.158018	0.333128
Ifnar1.1	ATGTAGACGTCTATATTCTC	0.204425	0.15582	0.164534	0.20172	0.150038	0.190277	0.267375	0.368209	0.107744	0.246564	1.31193	0.436983	0.333083
Pik3cg.4	GCCCCAGCTGACAAGCAAAG	0.227845	0.211045	0.230354	0.371972	0.185689	0.234257	0.322582	0.317381	0.112662	0.313456	1.0796	0.35942	0.332919
Endod1.2	TCCCGCAGTGCCGAGCAGCG	0.726965	0.714734	0.808157	0.604125	0.497706	0.719133	0.459252	0.689555	0.282469	0.835422	1.01711	0.338115	0.332427
Prkcz.4	TGGGACCTGGTAAGCCTCGA	0.16875	0.142696	0.181168	0.273056	0.112998	0.271747	0.123678	0.184043	0.112265	0.28673	1.18258	0.391536	0.331085
Tgif1.1	GTTCACGATTTCCCGCCGTG	0.179103	0.216447	0.269172	0.188527	0.234247	0.163802	0.205032	0.268797	0.0569085	0.208352	0.82747	0.273136	0.330086
Romo1.4	CCGCAGATGCCGGTGGCCGT	0.392772	0.348505	0.417004	0.438944	0.279583	0.452005	0.434832	0.434498	0.142907	0.384415	1.12702	0.371752	0.329854
Elf1.1	CAAACACTAGGTCGTTCTGT	0.133189	0.158516	0.0659639	0.108568	0.0216	0.126677	0.0897383	0.21213	0.0362127	0.131955	0.840223	0.274433	0.326619
S100a1.2	TGCTGTGGACAAGGTAATGA	0.199839	0.216278	0.210524	0.203293	0.102445	0.197354	0.199799	0.25569	0.0584581	0.194288	0.923991	0.300884	0.325636
Itpr2.3	GTTCCTCAAGAAGTTCTGCA	0.12931	0.12559	0.154904	0.0585101	0.0895633	0.144132	0.153178	0.121017	0.0339965	0.102018	1.02962	0.333241	0.323655
Cpsf2.4	GCTTCCCCACGGCGAATGGG	0.147357	0.129497	0.116104	0.104304	0.0586565	0.135255	0.0873795	0.0718003	0.0320123	0.0871797	1.13792	0.367199	0.322694
Pbx3.3	GAATGGAACTAAATTTCCGA	0.0796364	0.0945166	0.0837694	0.0905245	0.100285	0.111707	0.105859	0.0354277	0.0359946	0.132782	0.842566	0.271079	0.321731
Pbx3.1	CGACCCCCAGCTAATGAGAC	0.138648	0.115048	0.0911738	0.203092	0.0875227	0.132101	0.129298	0.189955	0.0600145	0.154928	1.20514	0.387371	0.321432
Cat.1	GGTTCCCGCCTCCGGTGGTC	0.367009	0.311413	0.350664	0.411406	0.288831	0.421753	0.166139	0.22925	0.148745	0.39358	1.17853	0.377929	0.320678
Aicda.1	ACCATTTCAAAAATGTCCGC	0.340055	0.178159	0.191521	0.230649	0.150412	0.246335	-	-	-	-	1.90871	0.610598	0.3199
Slc29a1.3	ACCTGCAGCTCAACCTTGCG	0.134135	0.130231	0.12846	0.211195	0.054861	0.185544	0.0879984	0.140021	0.0616664	0.187723	1.02998	0.328498	0.318936
Irak4.2	GTCGCCAACTGTGCAGTTCG	0.550029	0.634599	0.570841	0.528369	0.361812	0.407546	0.533831	0.477169	0.133391	0.486608	0.866735	0.274125	0.316273
Pycard.3	GCTATGGGCGCATCCCACGC	0.572816	0.41734	0.72991	0.513824	0.321329	0.405808	0.445395	0.586596	0.28152	0.648951	1.37254	0.433807	0.316062
Ly6e.1	CTACTCACCAAAGCCCGCAG	0.24088	0.17424	0.185158	0.125659	0.213864	0.177119	0.202459	0.170055	0.0664327	0.152154	1.38246	0.436615	0.315825
Pold4.1	ACACTTGGTACACCTCTAGG	0.0935178	0.16553	0.137755	0.0740893	0.12548	0.187904	0.133579	0.140613	0.0355075	0.200463	0.564958	0.177127	0.313523
Pacsin1.1	ACAGCTAGAGGCGGCCAAGA	0.153924	0.184081	0.166539	0.239789	0.242306	0.197558	0.120559	0.213267	0.08029	0.307609	0.836176	0.261013	0.312151
Inppl1.2	ACTGCCCGTGGTGGGGCCGG	0.879005	0.521801	0.901624	0.798737	0.781547	0.754768	0.758809	1.11952	0.720261	1.38849	1.68456	0.518738	0.307937
Ube2t.2	GCTAATACACCTTATGAGAA	0.12783	0.107896	0.108381	0.0557713	0.0682803	0.0682205	0.208143	0.0333186	0.0206298	0.0569323	1.18476	0.362357	0.305849
Btg2.4	TGAAGTGTCTTACCGCATCG	0.324992	0.285688	0.269318	0.288985	0.391699	0.235673	0.408442	0.278603	0.1169	0.336249	1.13758	0.347659	0.305613
Cat.2	GGAGTATCTGGTGATATCGT	0.255339	0.232632	0.22036	0.275672	0.207377	0.243673	0.189734	0.187785	0.0761039	0.227109	1.09761	0.335099	0.305299
Cd83.3	GGAGGGCAGCGCAACTTGAG	0.172045	0.253291	0.162484	0.232544	0.103009	0.289292	0.139538	0.241804	0.0386238	0.187105	0.679239	0.206429	0.303912
Naip5.2	ATGTGCAGTCTGATGAGGCT	0.430606	0.215927	0.392748	0.184792	0.31093	0.292845	0.337737	0.224273	0.130641	0.215904	1.99422	0.605086	0.30342
Auh.3	ATAGACGGCCTTGCCCTCGG	0.127417	0.11884	0.15887	0.131771	0.126615	0.190642	0.0721937	0.0942652	0.0465548	0.143694	1.07217	0.323986	0.302178
Prkd2.3	GATGCGCAAGCGCTACAGCG	0.334946	0.363072	0.391134	0.399121	0.359305	0.506973	0.411946	0.606369	0.135022	0.486888	0.922531	0.277315	0.300603
Myd88.1	GCACAAACTCGATATCGTTG	0.582665	0.500562	0.533137	0.46342	0.392383	0.43764	0.287861	0.38335	0.218989	0.628511	1.16402	0.348425	0.299328
Plagl1.3	GGACCACCTCAAGTCTCACG	0.177807	0.133413	0.191553	0.229003	0.182456	0.156828	0.175719	0.166967	0.114408	0.28759	1.33276	0.397818	0.298492
Inppl1.3	AGAATCCGGTCACACCACGA	0.126574	0.152925	0.0491294	0.0809331	0.0989226	0.0904413	0.0755114	0.151824	0.0248316	0.101234	0.827685	0.245288	0.296355
S100a6.3	CCAGGAAGGCGACATACTCC	0.116986	0.178218	0.121128	0.0991372	0.0319972	0.144085	0.137419	0.0885558	0.0360869	0.186228	0.656417	0.193778	0.295206
Atg5.1	AAGATGTGCTTCGAGATGTG	0.207249	0.328735	0.171952	0.344919	0.0910464	0.409459	0.126439	0.21329	0.0401414	0.216516	0.630443	0.185397	0.294074
Eea1.2	AAAGCTGGATAACACAACTG	0.211761	0.0879272	0.144542	0.114429	0.130824	0.187261	0.0884995	0.110053	0.0870849	0.123977	2.40837	0.702427	0.291661
Jak2.1	CGTTAATGAGTGAAACCGAA	0.338185	0.0702291	0.203332	0.124202	0.122176	0.120731	0.0764182	0.128833	0.13321	0.0950054	4.81545	1.40214	0.291174
Bcr.1	GTACACACAGATTCCTCGTT	0.155034	0.106137	0.118585	0.10909	0.119147	0.281487	-	-	-	-	1.4607	0.423278	0.289777
Tmem109.4	GAACAAGTTTCAGACCCCCC	0.129211	0.0832652	0.0951767	0.146815	0.157341	0.150072	0.150519	0.225392	0.0627064	0.139749	1.5518	0.448706	0.289152
Skil.3	GGGGCTTTGAGTCAGCCAAG	0.226943	0.181881	0.173472	0.156318	0.108471	0.203148	0.232995	0.226116	0.0802285	0.22293	1.24776	0.359882	0.288422
Cr2.2	TGGTGTCCATTATGAATCGT	0.148558	0.047936	0.111718	0.0975204	0.0996111	0.111641	-	-	-	-	3.09909	0.892242	0.287905
Tgfbr1.2	GGTGAATGACAGTGCGGTTA	0.287578	0.144036	0.299631	0.304336	0.291499	0.12436	0.273222	0.128166	0.121209	0.211769	1.99657	0.572365	0.286674
Smad2.2	CAGACCCATCAAACTCGGAG	0.11157	0.13024	0.121606	0.195157	0.102948	0.146488	0.115838	0.157732	0.0343883	0.140579	0.856646	0.24462	0.285555
Car2.1	CAAACTCAACGTTAAAGGAG	0.150954	0.126557	0.0783139	0.0807852	0.131133	0.0984276	0.157239	0.0504204	0.0308805	0.0908968	1.19278	0.339731	0.284824
Smpd1.1	GAGCCTACCCGTGCCACATT	0.0899073	0.166452	0.0873528	0.135247	0.0611869	0.135623	0.08457	0.118532	0.0345024	0.227978	0.540141	0.151341	0.280187
Cyth3.2	GCAGCACGTACCGGCTTCCG	0.187514	0.237216	0.110821	0.278897	0.132231	0.251139	0.168466	0.173497	0.0420359	0.190074	0.790479	0.221155	0.279774
Pml.1	TCACTAGCAAGCCATACAGG	0.357787	0.130609	0.205904	0.308773	0.302478	0.31638	0.388681	0.353959	0.293279	0.383217	2.73937	0.765309	0.279374
Ier5.2	GTCTGAAGGGAAGCGGCGGA	0.292226	0.248577	0.265906	0.237314	0.305676	0.288613	0.201059	0.289266	0.140216	0.432236	1.17559	0.324396	0.275943
Ier5.3	TCTGAAGGGAAGCGGCGGAG	0.293118	0.248577	0.265982	0.237314	0.306075	0.288856	0.201059	0.289455	0.140216	0.432236	1.17918	0.324396	0.275102
Pfn2.2	GTCGCAGTAGCCGACAATGG	0.143953	0.110339	0.143869	0.0705792	0.0968998	0.0927352	0.235231	0.0942652	0.0403572	0.113166	1.30464	0.35662	0.273348
Irf1.1	CCGCATTCGAGTGATTGGCA	0.180352	0.251724	0.183666	0.211321	0.144077	0.217136	0.114241	0.166267	0.050101	0.257746	0.716466	0.194381	0.271305
Tnfrsf10b.2	GCTTGCAGTTCCCTTCTGAC	0.277082	0.24105	0.379466	0.343012	0.313387	0.290974	0.437572	0.239769	0.10281	0.331263	1.14948	0.310357	0.269997
Lclat1.4	TCCAGTCCACACGTGTCCGG	0.178268	0.165517	0.231003	0.085837	0.111276	0.114814	0.213426	0.157822	0.0438462	0.151054	1.07704	0.290268	0.269506
Il3ra.2	CCCGCCCTACCCACTCACCG	0.691285	0.626464	0.63596	0.576806	0.420197	0.756672	0.769501	0.571409	0.218112	0.733662	1.10347	0.297293	0.269416
Adam19.3	TCTGCCAGTGCAGCCGATGG	0.113582	0.114692	0.0986662	0.108245	0.101107	0.0745492	0.169699	0.0477493	0.0388935	0.147682	0.990325	0.263359	0.265932
Smad2.1	GGATGGAAAAAATCAGCCGG	0.116534	0.143871	0.114056	0.158257	0.098127	0.212833	0.123177	0.149845	0.0371976	0.174171	0.80999	0.213569	0.263669
Romo1.3	CCCACGGCCACCGGCATCTG	0.375095	0.259481	0.209327	0.313523	0.276123	0.413938	0.186754	0.275341	0.106015	0.279608	1.44556	0.379154	0.262289
Auh.4	GCCAAACTAGCAATTAACCA	0.156702	0.138918	0.14442	0.128824	0.103854	0.158145	0.0564048	0.181127	0.0628068	0.212721	1.12801	0.295254	0.261747
Ets1.4	CTATGACAGCTTCGACTACG	0.23052	0.247887	0.211862	0.222962	0.217655	0.209717	0.198731	0.200384	0.0689511	0.287706	0.929939	0.239658	0.257714
Lsp1.2	CCACTGAGTTGTGAGCCTGG	0.11642	0.130545	0.0723986	0.0893595	0.0453559	0.140815	0.0413726	0.0668398	0.0316461	0.138892	0.891799	0.227847	0.255492
Jak2.2	TACAGATACGGAGTGTCCCG	0.235939	0.0966661	0.162669	0.24335	0.223775	0.265846	0.257633	0.140297	0.135223	0.218497	2.44076	0.618876	0.253559
Ctsd.4	GACTGTGAAACACTGCGGCG	0.236598	0.197444	0.22501	0.0906653	0.128019	0.179613	0.152667	0.202767	0.0553909	0.183329	1.1983	0.302139	0.25214
Tnfaip3.4	GGCACATGCGCAGAACCCCT	0.449752	0.435424	0.313297	0.388346	0.306653	0.462102	0.329886	0.464563	0.15836	0.611196	1.03291	0.259099	0.250845
Scyl2.2	GTCGTAGTCGGGTTAGCTGT	0.0971908	0.161063	0.101919	0.1294	0.121891	0.183809	0.104303	0.120854	0.0269686	0.178972	0.603435	0.150686	0.249714
Dgka.4	AACATCCCGAGCACGCACGG	0.279732	0.211616	0.228082	0.185554	0.299569	0.181652	0.175142	0.256543	0.0614347	0.186388	1.32189	0.329607	0.249346
Socs6.1	AGTTATGCCCAAACATCGGG	0.283656	0.113346	0.218796	0.225314	0.200387	0.239216	0.166385	0.202513	0.129948	0.208987	2.50256	0.6218	0.248465
B4galnt1.2	TCTAGCAGATCGAGTCTCGG	0.0661688	0.0500457	0.0418999	0.0729041	0.0570851	0.0952853	0.0735625	0.080221	0.0297486	0.0912279	1.32217	0.326091	0.246634
Vps37a.4	GATGACGCGCTCTTCGCCAG	0.11266	0.169275	0.143459	0.166982	0.181131	0.125886	0.185671	0.152522	0.0231967	0.14176	0.665543	0.163633	0.245865
Irf4.1	CTCCAAGTTCATGACGCGTG	0.110348	0.122741	0.0865549	0.0697692	0.0771764	0.0542737	0.094652	0.06866	0.0241917	0.110576	0.899031	0.218779	0.24335
Scyl2.3	AAACATCATGCCGAGGCCCG	0.181695	0.120861	0.143706	0.152401	0.190013	0.15038	0.0735625	0.117352	0.0692091	0.189237	1.50334	0.365727	0.243277
Prkcz.3	CTTTTCCACAGGGTTCAGCG	0.0769334	0.0579952	0.137765	0.0868857	0.0612055	0.0595332	0.0960328	0.0246587	0.0365288	0.113941	1.32655	0.320593	0.241675
Ctrl40.2	TTTACAATGCTCTGTCCGGA	0.254156	0.184316	0.266926	0.209689	0.13965	0.254178	0.108072	0.258259	0.0885819	0.27301	1.37891	0.324464	0.235304
Cklf.4	AAGGGCCGACGGCTTACGAC	0.476497	0.489295	0.626165	0.456443	0.53125	0.453016	0.532372	0.424988	0.224436	0.98833	0.973844	0.227086	0.233185
Pold4.3	GAACCGCTTCCGACCCATGG	0.0854559	0.0844431	0.089473	0.0702966	0.0516287	0.110971	0.0521771	0.0767231	0.035694	0.151364	1.01199	0.235815	0.233021
Btg2.1	ATGAAGTGTCTTACCGCATC	0.228007	0.162785	0.124846	0.121852	0.231195	0.149073	0.228079	0.110737	0.067217	0.207107	1.40066	0.324553	0.231714
Hipk2.2	CTGGGCTGGCCATTATACCC	0.127366	0.0560701	0.108565	0.0661851	0.0470891	0.0655111	0.0678438	0.0707296	0.0666372	0.126822	2.27155	0.525437	0.231313
Psen2.3	CATCTACACGCCCTTCACGG	0.167227	0.111206	0.110973	0.0731517	0.123349	0.0799178	0.17685	0.107133	0.036988	0.107288	1.50375	0.344753	0.229262
Dgkz.1	CCGGAGCAGCGACTCGGAGT	0.229653	0.119881	0.246417	0.184948	0.164752	0.223728	0.279458	0.129057	0.107393	0.244936	1.91567	0.438451	0.228876
Scyl2.1	GGTCGACACATTGCCAGTGG	0.164373	0.225991	0.089499	0.223831	0.0735823	0.251156	0.0417494	0.222932	0.0371925	0.22859	0.727343	0.162704	0.223696
Ski.1	CGGCTGGAAGCCGCCCCGGC	0.380097	0.327208	0.387955	0.281747	0.298479	0.271515	0.299669	0.280789	0.0506964	0.195197	1.16164	0.259719	0.22358
Irf1.4	AGCCGCAACAGACGAGGATG	0.319546	0.302229	0.187122	0.347823	0.262991	0.305262	0.330933	0.260949	0.0835847	0.356684	1.0573	0.234338	0.221639
Scyl2.4	TTCACTGACCAGTATACCCG	0.175022	0.0999356	0.18206	0.141849	0.125251	0.0983722	0.111599	0.0430268	0.0461895	0.119207	1.75134	0.387473	0.221243
Ltb.3	AGGACTGCGCAACAGGGCCC	0.240014	0.232403	0.217474	0.220677	0.211929	0.208958	0.212432	0.300092	0.0724103	0.317708	1.03275	0.227914	0.220687
Gas2.1	AGCTTCGCGGCGCTGGAGTC	0.503134	0.352821	0.320938	0.502679	0.351988	0.458267	0.345756	0.353893	0.160236	0.51312	1.42603	0.312277	0.218983
Irf4.4	ACCCGGACGACAATGGACAG	0.131684	0.110379	0.089871	0.116927	0.0465068	0.0639793	0.110339	0.140111	0.0231563	0.0889101	1.19302	0.260446	0.218308
Etf1.1	CAAAGACCAGATTTCACGAG	0.207698	0.156337	0.171314	0.185239	0.184207	0.179132	0.183559	0.118359	0.0413837	0.143727	1.32853	0.287932	0.21673
Tmbim1.4	AACCAGTCGGCAAATACGTG	0.13397	0.123842	0.18869	0.135563	0.13511	0.137032	0.0313677	0.124191	0.0318532	0.136319	1.08179	0.233666	0.216
Ube2t.1	GATGCCCGGGGGAGGTTCGA	0.188292	0.158339	0.111762	0.132551	0.0302784	0.183788	0.0828562	0.115406	0.0359946	0.141636	1.18917	0.254135	0.213707
Adam19.2	GCATACACACACGTACCCCG	0.187249	0.0811734	0.136657	0.0956605	0.0544904	0.079028	0.0489056	0.166918	0.0567715	0.115395	2.30678	0.491974	0.213273
Cdkn2c.3	GTAAACGTCAACGCTCAAAA	0.170445	0.164447	0.0872181	0.148825	0.169774	0.206775	0.112999	0.152672	0.0498701	0.228109	1.03647	0.218624	0.210931
Cd68.4	CTACCTGGACTACATGGCGG	0.142002	0.0723231	0.118389	0.102219	0.130335	0.106241	0.0348798	0.0634204	0.0233634	0.0568269	1.96344	0.411132	0.209394
Aes.2	CATCTCGATGTTCAATCCGT	0.0950504	0.0618167	0.0809839	0.0540984	0.0326352	0.0390198	0.001	0.0609353	0.0231563	0.0719715	1.53762	0.321743	0.209248
Pfn2.4	AGGGCTCGAAGATGGCCGGT	0.101102	0.107985	0.0868683	0.10048	0.0808877	0.117022	0.0780306	0.11263	0.0246058	0.127228	0.936267	0.1934	0.206565
Etf1.3	CAGTGCTGCCGATAGGAACG	0.084943	0.0639508	0.119503	0.0823952	0.110312	0.0644832	0.0817795	0.0903182	0.0337164	0.127397	1.32825	0.264656	0.199251
Ube2t.4	CTAGCCATCGAACCTCCCCC	0.111528	0.0909089	0.0930489	0.117627	0.0304017	0.145657	0.105579	0.109229	0.0204531	0.084138	1.22681	0.24309	0.198149
Gnpat.1	GATCCCCCTATACAAGGGCG	0.0887545	0.0564586	0.0840347	0.0474611	0.160103	0.0688452	0.0747796	0.0642347	0.0577368	0.190001	1.57203	0.303876	0.193302
Tank.4	ACACGTCGCTCTAAGATTTG	0.0994123	0.118103	0.104329	0.206817	0.121051	0.188156	0.127716	0.206637	0.0304277	0.187968	0.841745	0.161878	0.192312
Wdpcp.2	GTTACCTTCTGCATTCCAGG	0.137746	0.217717	0.131545	0.171479	0.123549	0.134476	0.208416	0.121017	0.0120418	0.0997505	0.632684	0.120719	0.190804
Irf8.3	GCTTCACGAACACGCCCTTG	0.143613	0.113641	0.15563	0.160813	0.125802	0.209945	0.0643249	0.186544	0.0301967	0.125294	1.26374	0.241007	0.190709
Ube2t.3	TGCCAGCACGTGATGCCCGG	0.385941	0.28888	0.459026	0.28111	0.240032	0.323785	0.373818	0.357494	0.0711791	0.281978	1.33599	0.252428	0.188944
Irak4.1	AGGTTGCGTATGTATGTCGA	0.0833786	0.121306	0.0685597	0.136499	0.0737779	0.148558	0.080692	0.0830993	0.033996	0.262832	0.687344	0.129345	0.188181
Pacsin1.3	GAGAGCGGAAACCCCTTCGG	0.242277	0.167861	0.243957	0.0624272	0.120305	0.158067	0.177141	0.226116	0.0314391	0.115814	1.44332	0.271462	0.188082
Auh.1	GTAAACATACAACATGGCGG	0.167694	0.110363	0.251959	0.115777	0.117756	0.148868	0.168493	0.108006	0.0480048	0.168121	1.51947	0.285537	0.187919
Csf2ra.1	CTTCTCCACGCTACTGCTTC	0.157208	0.149242	0.0557389	0.154229	0.0918821	0.102439	0.108006	0.173244	0.0371611	0.189565	1.05337	0.196034	0.186101
Cdkn2c.2	GGGGCATCGGAACCATAAGG	0.240499	0.202967	0.174541	0.197454	0.0245868	0.205462	0.196637	0.198487	0.0287472	0.131447	1.18492	0.218697	0.184568
Gpd2.1	GGAGGTATCGCACACCACCG	0.275846	0.188158	0.288311	0.229509	0.244843	0.2891	0.198051	0.27428	0.101467	0.376646	1.46603	0.269396	0.183759
Cd200.2	GCCATCTCCTGGAAGGGTAC	0.133233	0.127325	0.108749	0.0821455	0.0884415	0.0799913	0.0410345	0.0589943	0.0263552	0.140398	1.0464	0.187718	0.179393
Tgfbr2.4	CCTTGTAGACCTCGGCGAAG	0.177065	0.0805166	0.184362	0.158817	0.0847787	0.161049	0.151346	0.262872	0.0559368	0.142933	2.19911	0.391349	0.177958
Ptpn13.1	GGAGACATTTTCATCCGTAA	0.121047	0.125444	0.149225	0.173854	0.0578912	0.124422	0.168907	0.121105	0.032523	0.193192	0.964949	0.168345	0.17446
Fcrl1.1	GCAGGTTCACACGGTAGAGC	0.135596	0.187374	0.194526	0.210223	0.141256	0.311185	0.133681	0.200627	0.0355804	0.283821	0.723666	0.125362	0.173232
Ptprs.2	GATCAGATTGGAGTGTCGGG	0.22663	0.218654	0.295982	0.246185	0.21272	0.252072	0.286671	0.27428	0.0583745	0.325948	1.03648	0.179091	0.172788
Itgav.4	CGAAAAGAATGACACAGCGG	0.126534	0.110556	0.167861	0.0904681	0.224742	0.132242	0.175923	0.0802182	0.0373727	0.190149	1.14452	0.196545	0.171727
Eif2ak2.4	TGAACAAATCGTGACCGGAG	0.178	0.135911	0.116556	0.131318	0.10053	0.181902	0.193801	0.203966	0.0403185	0.181032	1.30968	0.222714	0.170052
Fth1.4	GTAGTTCTGGCGCACTTGCG	0.189003	0.16508	0.157605	0.215844	0.213642	0.159304	0.215759	0.139143	0.0493104	0.253625	1.14492	0.194423	0.169814
Cd200.4	GGAGCGGGGTGAATCATCAC	0.22872	0.173678	0.114277	0.252021	0.167192	0.205295	0.148627	0.200148	0.0484187	0.221519	1.31693	0.218576	0.165975
Tbc1d4.1	GTTATCCAAGGCTGCCATGA	0.158958	0.109975	0.125419	0.132706	0.0648437	0.0798297	0.152199	0.0495181	0.018994	0.0810537	1.44541	0.234338	0.162126
Nsmaf.4	GAGCCTTACCGATCCTAACG	0.174001	0.108906	0.0969011	0.168732	0.114788	0.145616	0.0740943	0.0934413	0.0322673	0.125171	1.59771	0.257786	0.161347
Map3k5.1	TGGAGATGAGCGACGCCTTC	0.215313	0.230942	0.166661	0.323734	0.121367	0.189628	0.14274	0.255175	0.0488455	0.331199	0.932325	0.147481	0.158186
Gnpat.2	CTTTCTAGGGAGTCGCTGAC	0.118791	0.0447238	0.0893997	0.0765732	0.0729388	0.125618	0.172219	0.0544486	0.0371925	0.0908698	2.6561	0.409294	0.154096
Alcam.4	GGACCGCGGCGGAGATCAAG	0.241495	0.136759	0.307866	0.168671	0.143656	0.218717	0.246211	0.298173	0.0532908	0.200081	1.76585	0.266346	0.150832
Tmbim1.3	TGGACGGGAGGAACCGGCTG	0.284194	0.201661	0.201882	0.282557	0.215256	0.237412	0.166479	0.344802	0.0468029	0.225369	1.40927	0.207672	0.147362
Irf4.3	GTCCGCACGCGTCATGAACT	0.173922	0.113871	0.22535	0.246269	0.219245	0.242561	0.190979	0.285264	0.0420999	0.187554	1.52737	0.224469	0.146964
Slc29a1.1	GCTCATCAATTGTAATCGGG	0.144515	0.172447	0.102163	0.127651	0.107781	0.109646	0.0959194	0.145607	0.0172984	0.142318	0.838027	0.121548	0.145041
Rnf11.4	GGAGATGTCATCCGAAGTCG	0.240014	0.172171	0.175756	0.247725	0.137641	0.231654	0.143422	0.242453	0.0356342	0.177539	1.39404	0.200712	0.143979
Il4ra.3	TCTACTATACGGCGCGTGTG	0.293206	0.286798	0.271028	0.281791	0.154977	0.25189	0.125713	0.126091	0.0492719	0.345374	1.02234	0.142662	0.139544
Ttc39b.4	GTCTGAAGCAGAGAATCGCG	0.26112	0.192867	0.140712	0.193809	0.147999	0.179505	0.153427	0.167854	0.0560254	0.309726	1.35389	0.180887	0.133606
Flot2.1	AGGACGTAGAGACGGCCGAG	0.175246	0.0764664	0.120791	0.131734	0.137279	0.0992766	0.196891	0.0830638	0.0320265	0.10526	2.2918	0.30426	0.13276
Smpd1.2	GATTCAAGATGTAGGTCTCG	0.176846	0.147559	0.168009	0.198595	0.0749849	0.186486	0.124472	0.137379	0.0298104	0.196341	1.19848	0.15183	0.126686
Trim26.4	GGAGAACATTGAACGGCTGA	0.218691	0.18693	0.200035	0.228281	0.105785	0.188036	0.1437	0.160338	0.0339965	0.237851	1.16991	0.142932	0.122173
Traf6.2	AGCAGTATTTCATTGTCAAC	0.192763	0.191622	0.164545	0.240799	0.151892	0.240878	0.087906	0.166883	0.0313151	0.261896	1.00596	0.119571	0.118863
Cmtm4.1	TATCTGCATCGAGACTATCA	0.287199	0.183792	0.100246	0.184631	0.122889	0.174503	0.0321231	0.199448	0.0403401	0.230293	1.56263	0.175168	0.112099
Mdh2.1	TGTGTGAGCGATATCGTAGA	0.199654	0.258632	0.15508	0.298265	0.163435	0.233069	0.220475	0.317341	0.025062	0.293591	0.77196	0.0853634	0.11058
Dgka.2	CAGTACATCGCTGACCCTTT	0.191978	0.247266	0.111858	0.107353	0.22055	0.145204	0.137725	0.195062	0.0200149	0.235713	0.776401	0.084912	0.109366
Nfatc1.4	CAAGACCACGGACCCGGAGG	0.391582	0.255773	0.421516	0.303617	0.253225	0.213811	0.351123	0.260622	0.0506161	0.321019	1.53097	0.157673	0.102989
Adam19.4	CCAATCCGGTGCCAGGCCAA	0.0946801	0.0771189	0.0997394	0.105301	0.0502198	0.0831404	0.112299	0.0648184	0.0123184	0.0992703	1.22772	0.124089	0.101073
Camk1d.1	AGTGAAGTGCATCCCGAAGA	0.292128	0.195277	0.253787	0.216665	0.073955	0.182468	0.168713	0.200092	0.0222031	0.147184	1.49597	0.150853	0.10084
Cmtm4.4	TCTAAACCATAAAACCGGAG	0.0773878	0.0376281	0.0835484	0.0800135	0.0635154	0.0997286	0.0519337	0.00116688	0.0227332	0.129301	2.05665	0.175816	0.0854868
Ifngr2.3	CATCCCGGAACAAATCGAAG	0.0579097	0.0618314	0.096312	0.0608929	0.0712988	0.0433262	0.032588	0.0699372	0.001	0.0136798	0.936573	0.0731003	0.0780508
Mdh2.4	GTGTGTGAGCGATATCGTAG	0.391068	0.496592	0.330884	0.538858	0.376655	0.417054	0.326229	0.534701	0.0258482	0.476932	0.787503	0.0541968	0.0688211
E2f8.2	ACAACCAGTCGCGGGGACAG	0.293118	0.166005	0.315225	0.102969	0.107068	0.182023	0.469345	0.249276	0.0206298	0.202692	1.76573	0.101779	0.0576414
Nsmaf.2	GGCACCGTATAAGATAGAGC	0.158183	0.173495	0.0998192	0.216603	0.0955849	0.289505	0.0361936	0.213405	0.00948981	0.203607	0.911743	0.0466085	0.0511202
Itgav.2	GCTGACAGAGTACTTCTCGG	0.160743	0.0871502	0.115298	0.11099	0.13263	0.0635175	0.139762	0.0950998	0.00741912	0.0819568	1.84444	0.0905248	0.0490799
Ect2.2	CATTGAGTCCATCTTTACAC	0.0146907	0.0407978	0.0418072	0.0410141	0.001	0.0460515	0.126944	0.0860962	0.001	0.0623102	0.360086	0.0160487	0.0445691
Ctrl66.2	AATTCTCCGGCAAGGACGCC	0.0468729	0.0692754	0.0266506	0.0270162	0.0254499	0.0717308	0.0593796	0.0305657	0.001	0.0395745	0.676616	0.0252688	0.0373458
Bub1.4	ATAGGTCTTCCACTGTCGCA	0.0426056	0.0873442	0.0632143	0.0444924	0.0375098	0.0360805	0.0552911	0.0951532	0.001	0.0566575	0.48779	0.0176499	0.0361834
Slc12a4.3	GTTACTCACGGAAACACGGG	0.0395088	0.0383384	0.0339131	0.0647397	0.0655176	0.0325483	0.035605	0.0357917	0.001	0.0307404	1.03053	0.0325304	0.0315668
S100a6.1	TCTGGACCGTAACAAGGATC	0.0770919	0.0462604	0.0831756	0.122483	0.001	0.0635348	0.086571	0.0612277	0.001	0.0196974	1.66648	0.050768	0.0304643
Rbm39.1	TAGTGAAACTGGCCGATCTA	0.0518679	0.0476915	0.0496801	0.0487345	0.0347987	0.0269189	0.0799796	0.0775676	0.001	0.0310138	1.08757	0.0322438	0.0296475
Gdi1.1	CACCCCCATAGTAGGGGTTT	0.018069	0.0185171	0.0252711	0.0268985	0.001	0.0272459	0.0289998	0.0506444	0.001	0.035816	0.975798	0.0279205	0.028613
Tubb2a.1	CAACCAGATCGGCGCTAAGG	0.0870561	0.126688	0.0884119	0.100267	0.140295	0.180201	0.0793995	0.102598	0.001	0.0553023	0.68717	0.0180824	0.0263143
Gpr65.2	CCTCGAACACTATTTGTTCC	0.0328438	0.0605088	0.0234324	0.0459052	0.001	0.0246295	0.00925995	0.0980063	0.001	0.070137	0.542794	0.0142578	0.0262674
Pon2.1	GCTTATCCGGTGCAAAGCTG	0.0802393	0.0919094	0.0941156	0.0649565	0.0365157	0.0566988	0.0824795	0.0186894	0.00120448	0.0557878	0.873026	0.0215903	0.0247304
Lta.2	GATCGTGCCTTTCTCCGACA	0.0902565	0.173271	0.124226	0.0832962	0.0614852	0.0883299	0.0305795	0.0618372	0.001	0.0922212	0.520898	0.0108435	0.0208169
Nusap1.4	GTACCTTCATGTTAGCCCGG	0.0969018	0.0827796	0.0885396	0.0785172	0.134227	0.112263	0.0876303	0.105772	0.001	0.0426762	1.1706	0.0234322	0.0200173
Ptpn2.2	GCCCGATGCCCGCACTGCAA	0.117907	0.156337	0.144918	0.128332	0.0557559	0.108409	0.162139	0.203157	0.001	0.0699459	0.754184	0.0142968	0.0189566
Smad2.4	GTTAGAATCTCCGTGTGCCG	0.0973812	0.161291	0.0603472	0.114624	0.0669648	0.152425	0.0598521	0.0683207	0.001	0.0953668	0.60376	0.0104858	0.0173676
B4galnt1.3	GCGCATTAGCGACCCACACG	0.0519976	0.0781652	0.0914651	0.0297616	0.0825329	0.062077	0.106448	0.0675229	0.001	0.0879004	0.665227	0.0113765	0.0171017
Wbp5.2	ACAAACTTATAGTGACGCGT	0.0685028	0.149925	0.0791457	0.106843	0.0782112	0.102304	0.0770369	0.0543117	0.001	0.134774	0.456913	0.00741983	0.0162391
Il2rg.3	CAAAGGAGGGGCCCTAGGAG	0.122534	0.114831	0.146537	0.1283	0.120355	0.0774509	0.188811	0.167216	0.001	0.0587682	1.06708	0.017016	0.0159463
Sat1.1	ATCCTGCGACTGATCAAGGT	0.14662	0.172803	0.147059	0.102925	0.099133	0.182893	0.181879	0.116631	0.001	0.075787	0.848477	0.0131949	0.0155512
Nfatc1.3	GGGCTTCGCCCACTGATACG	0.0959462	0.0952985	0.122466	0.06248	0.0918139	0.0754216	0.0701667	0.0517857	0.001	0.0668912	1.0068	0.0149496	0.0148487
Smad2.3	CATACTATGAACTAAACCAG	0.0438502	0.0409185	0.0560622	0.0314968	0.001	0.0458275	0.001	0.0478996	0.001	0.063937	1.07165	0.0156404	0.0145947
Ski.3	TAGGGCCACATTGGGGGCCA	0.0948717	0.0934675	0.0714336	0.0817423	0.073397	0.0338281	0.104344	0.0339061	0.001	0.0723112	1.01502	0.0138291	0.0136244
Pfn1.2	TCTTGTTGATCAAACCACCG	0.076388	0.0848615	0.102846	0.0832962	0.0403592	0.0933105	0.0642687	0.122332	0.001	0.0817723	0.900149	0.0122291	0.0135856
Tbc1d4.2	CGACACTAAATCAGTCGTGC	0.123683	0.179482	0.122753	0.128413	0.0299307	0.0844801	0.16364	0.124412	0.001	0.106861	0.689114	0.00935799	0.0135797
Itpr2.2	GTAACCTCTTGTTCACCGTC	0.0633641	0.0811734	0.0294805	0.0760838	0.081492	0.0427405	0.176194	0.125841	0.001	0.103047	0.780603	0.00970433	0.0124318
Nedd1.3	CCCTTGGGAACAGTCGGCCA	0.0876448	0.0553445	0.121042	0.0464339	0.0337848	0.0138441	0.108239	0.001	0.001	0.0523093	1.58362	0.0191171	0.0120717
Irf8.4	GCTACTGCACAGCAACCGCA	0.0658977	0.07398	0.0679926	0.0567869	0.0254571	0.118818	0.118593	0.0258512	0.001	0.0956286	0.89075	0.0104571	0.0117397
Fcrl1.4	TCTGGTGTACCACACCCCGC	0.0892908	0.0667335	0.0664046	0.0487345	0.0559495	0.0556678	0.0455142	0.0850556	0.001	0.0673603	1.33802	0.0148455	0.0110951
Gpd2.3	TTATCGGAGGCGGAGCCACA	0.109378	0.172041	0.0267328	0.124185	0.159058	0.100655	0.165315	0.126426	0.001	0.143727	0.635767	0.00695762	0.0109437
Cat.4	GGTAGTTGGCCACTCGAGCG	0.0955973	0.128519	0.162891	0.108487	0.0808581	0.114926	0.145659	0.106067	0.001	0.12318	0.743839	0.00811819	0.0109139
Lsp1.4	GCGAAGGGTGAGTTCCACTA	0.0911343	0.106546	0.0701885	0.109329	0.100097	0.0984616	0.106463	0.101981	0.001	0.107287	0.855349	0.00932081	0.0108971
Pde6d.1	TCCCTGTTTCGGCATCCCGA	0.141808	0.144317	0.0953248	0.172553	0.173057	0.135281	0.111748	0.229335	0.001	0.0944872	0.982612	0.0105834	0.0107707
Spp1.3	ATTCAGCTGTACTCACCGGG	0.0911343	0.14696	0.0986662	0.156898	0.153275	0.108783	0.135654	0.108985	0.001	0.152098	0.62013	0.00657472	0.0106022
Nusap1.1	TGACGCCTTCACCTTAGACT	0.103937	0.118516	0.0549858	0.114071	0.10686	0.124625	0.100917	0.124635	0.001	0.109706	0.876984	0.00911527	0.0103939
Itpr2.4	TCAGGAGGAACCGGGAGCCG	0.128298	0.106546	0.124194	0.119908	0.124776	0.153524	0.0733537	0.167971	0.001	0.096358	1.20415	0.010378	0.00861851
Dgka.1	GCAGCTGAGCGAAGTCTTCT	0.0947015	0.0835023	0.0481583	0.0839628	0.0551737	0.0904536	0.0645088	0.122625	0.001	0.106597	1.13412	0.00938111	0.00827171
Myb.4	GTCGTCCTACGAAAAAGGCG	0.1206	0.106792	0.0868194	0.0554086	0.0315056	0.0638559	0.0837395	0.03126	0.001	0.113185	1.12929	0.00883512	0.00782361
Nsmaf.3	GCCAGTGGGAGCCCTAAATG	0.176212	0.161689	0.170162	0.124071	0.150294	0.188319	0.159172	0.0824243	0.001	0.117657	1.08982	0.00849927	0.00779877
Elf1.2	GATGACGACATCACCCTTAC	0.158183	0.210208	0.290428	0.205575	0.142159	0.271642	0.258722	0.292209	0.001	0.171114	0.752505	0.00584405	0.00776613
Fth1.2	ACGTTTCCGATACTCACGTG	0.0833867	0.107854	0.071024	0.0940925	0.107518	0.0974414	0.0750579	0.113009	0.001	0.169473	0.773142	0.00590065	0.00763204
Tbc1d22a.2	CCGCTTGGCCTTCACCGGAG	0.0856083	0.0945317	0.0648037	0.0702552	0.0197592	0.0992766	0.0908983	0.086231	0.001	0.145816	0.905604	0.00685798	0.00757282
Capzb.1	CCAGGTCGATCAGATCGCTG	0.0748871	0.0436958	0.0491659	0.046829	0.0721797	0.0782799	0.0255045	0.141089	0.001	0.0779639	1.71383	0.0128265	0.0074841
Psen2.1	CACTGCATGCGTAGCGGTCC	0.195547	0.201778	0.211718	0.179968	0.101976	0.198318	0.28502	0.134319	0.001	0.145752	0.969122	0.00686097	0.00707957
Cdkn2c.1	AGAAGCCTCCTGGCAATCTC	0.0993848	0.0758998	0.0294713	0.0590306	0.0337329	0.0625676	0.0355798	0.0809676	0.001	0.108192	1.30942	0.00924283	0.00705872
Cd83.2	AGAAAAGCTTGTTCCGTACC	0.137262	0.172333	0.13201	0.22712	0.156562	0.236718	0.154117	0.216913	0.00120448	0.215354	0.796493	0.005593	0.00702203
Car2.2	TTCACTGGAACACCAAATAT	0.0900694	0.0810426	0.0770715	0.121657	0.0189408	0.0527078	0.0806035	0.0470543	0.001	0.132617	1.11138	0.00754052	0.00678481
Ptpn2.4	GGAAACTTGGCCACTCTATG	0.17385	0.213705	0.159664	0.21316	0.148002	0.227377	0.163196	0.136889	0.001	0.20364	0.813508	0.00491062	0.00603635
Gaa.3	ATGGAGAAGGGAGAGTACCG	0.175947	0.228614	0.105258	0.239092	0.100317	0.209099	0.198959	0.305186	0.001	0.230981	0.769624	0.00432935	0.00562529
Spp1.2	ACTAACTACGACCATGAGAT	0.165289	0.147745	0.0583407	0.119901	0.0871235	0.15944	0.175577	0.149815	0.001	0.164267	1.11875	0.00608763	0.00544148
Trim26.2	CAGGCCGGTTCCCCGATATG	0.123505	0.0671424	0.0779518	0.12331	0.0347083	0.081046	0.0858945	0.122733	0.001	0.100804	1.83946	0.00992026	0.00539304
Nsmaf.1	CTCCAAGTTGAGAAGCAGTA	0.0978552	0.0907925	0.123695	0.127517	0.0171669	0.121252	0.107145	0.20841	0.001	0.172694	1.07779	0.00579058	0.00537265
Eea1.1	CCTTGAGAGCCAACTCGCCC	0.19461	0.159543	0.111227	0.161795	0.0921133	0.153668	0.0926861	0.167781	0.001	0.157102	1.2198	0.0063653	0.00521831
Ptpn13.2	CTTGGAATGACATTGTATTG	0.166178	0.128942	0.121055	0.126443	0.054534	0.1279	0.123219	0.165886	0.001	0.168048	1.28878	0.00595068	0.00461728
Cblb.3	GCACTTCGTGCCTTACCGCG	0.118563	0.0413568	0.102339	0.0487345	0.0672642	0.0791672	0.154159	0.0498367	0.001	0.080138	2.86683	0.0124785	0.0043527
Eea1.4	GGTAATGACTCGGGTCATGG	0.0714038	0.0458273	0.059296	0.0874478	0.0676214	0.175144	0.0827595	0.0454945	0.001	0.18147	1.55811	0.00551054	0.00353669
